# Supplementary material for: The Relationship Between Parental Phubbing and Chinese Adolescents’ Mobile Phone Addiction: A Longitudinal Study
Source: Research Square preprint supplement (doi:10.21203/rs.3.rs-6684101/v1), 2025-06-27
Supplement: Supplementary file 1 [file 600505ee450928d1bc76f51a.xlsx]

## Sheet: 调回归
ID	性别	年龄	人均月收入	地理区域	父亲学历	母亲学历	X1_1	X1_2	X1_3	X1_4	X1_5	X1_6	X1_7	X1_8	X1_9	X1	M1_1	M1_2	M1_3	M1_4	M1_5	M1_6	M1_7	M1_8	M1_9	M1_10	M1	M2_1	M2_2	M2_3	M2_4	M2_5	M2_6	M2_7	M2_8	M2_9	M2_10	M2	W1_1	W1_2	W1_3	W1_4	W1_5	W1_6	W1_7	W1_8	W1_9	W1_10	W1_11
1	1	11	1	4	2	2	5	5	5	4	5	5	4	5	5	4.77778	4	4	3	3	3	4	4	5	4	4	3.8	3	4	3	3	3	1	3	3	3	3	2.9	3	2	3	2	1	1	1	4	3	2	1
2	1	11	2	4	5	1	4	4	5	5	5	5	5	5	5	4.77778	1	1	2	2	1	1	1	1	3	1	1.4	2	1	2	3	3	3	2	3	3	2	2.4	3	2	4	5	5	3	3	3	3	3	4
3	0	10	5	3	5	5	4	4	4	1	4	3	4	5	4	3.66667	2	2	2	1	1	3	3	3	2	3	2.2	5	5	5	4	5	5	5	5	4	5	4.8	6	5	4	3	3	4	4	6	4	5	6
4	0	14	6	3	3	3	3	1	3	4	3	3	2	1	2	2.44444	2	1	1	1	3	2	2	3	3	4	2.2	5	5	5	5	5	5	4	4	5	4	4.7	3	2	1	3	2	2	3	1	2	1	1
5	1	13	6	3	5	4	3	4	2	1	3	2	2	4	2	2.55556	2	2	2	4	3	3	3	3	1	3	2.6	5	4	5	5	4	5	4	5	5	5	4.7	1	1	1	2	3	3	3	2	1	2	4
6	1	11	6	1	5	5	3	2	1	2	2	1	3	2	2	2	3	2	2	3	3	3	4	3	3	3	2.9	4	4	5	5	3	4	5	4	5	4	4.3	3	2	2	5	3	4	5	3	3	3	5
7	1	14	5	1	2	4	3	4	3	2	3	2	2	2	2	2.55556	4	3	5	3	4	4	3	4	5	4	3.9	3	4	4	3	4	3	3	4	4	3	3.5	4	5	4	4	4	4	3	4	6	4	4
8	0	11	5	3	5	3	4	4	5	5	4	4	3	3	5	4.11111	5	4	5	5	5	4	3	4	4	5	4.4	4	4	5	5	4	5	4	4	4	5	4.4	4	3	4	3	4	6	5	3	5	3	4
9	1	10	10	5	4	3	5	5	4	4	4	5	4	5	4	4.44444	2	3	4	4	3	2	4	4	3	4	3.3	5	4	5	5	5	5	5	5	4	5	4.8	4	4	6	5	6	3	4	4	4	3	5
10	0	12	4	3	3	2	3	2	3	5	4	5	2	4	5	3.66667	3	4	3	3	4	4	4	4	3	4	3.6	3	3	2	2	3	3	3	3	3	3	2.8	3	2	3	1	2	1	2	2	2	1	4
11	0	13	1	2	1	1	5	4	4	5	5	5	5	5	5	4.77778	3	1	2	3	3	2	3	3	2	1	2.3	3	3	1	2	3	1	3	3	3	1	2.3	4	3	4	4	3	4	3	4	3	4	4
12	0	12	6	3	5	4	2	4	1	2	3	2	1	2	3	2.22222	5	5	5	5	5	5	5	5	4	5	4.9	4	4	4	5	4	5	5	4	5	5	4.5	5	4	3	6	3	4	6	6	4	4	4
13	0	11	7	1	2	5	5	5	5	5	5	5	5	5	5	5	4	4	5	4	4	4	3	4	4	4	4	4	4	5	4	5	4	3	4	4	3	4	4	2	4	4	4	2	5	3	5	1	4
14	1	14	1	3	2	1	4	4	5	5	4	5	4	4	3	4.22222	5	4	3	4	4	4	4	4	3	4	3.9	1	3	3	3	3	1	3	2	3	1	2.3	3	4	1	5	4	3	4	3	3	4	3
15	0	13	4	3	1	1	4	5	4	4	4	3	4	5	5	4.22222	2	2	2	1	1	3	1	2	1	3	1.8	3	3	3	4	3	3	4	3	1	2	2.9	1	2	1	3	2	1	1	2	2	1	4
16	1	10	5	1	1	1	1	2	2	4	3	1	2	3	2	2.22222	2	4	4	2	3	4	4	3	3	4	3.3	3	3	4	5	3	3	3	3	2	3	3.2	4	4	6	6	3	5	5	4	4	3	4
17	0	12	6	3	5	2	5	5	5	5	4	5	5	5	4	4.77778	5	5	4	4	5	5	5	5	4	4	4.6	4	4	3	4	4	5	4	4	5	5	4.2	4	4	6	5	3	4	5	6	4	4	5
18	1	10	6	2	3	4	5	5	5	5	5	5	5	5	5	5	3	1	4	2	4	3	1	4	3	3	2.8	3	3	3	3	4	4	3	4	4	3	3.4	4	3	4	4	5	4	6	5	6	4	3
19	1	14	7	5	5	3	3	4	4	2	3	3	3	2	4	3.11111	3	2	2	4	3	4	3	3	4	4	3.2	4	3	3	4	4	1	4	4	3	1	3.1	1	2	2	3	3	3	2	2	1	3	3
20	0	12	1	3	2	1	3	1	4	2	2	2	2	2	2	2.22222	3	2	2	3	3	3	3	2	3	1	2.5	4	5	4	4	5	4	5	5	5	4	4.5	2	2	2	3	2	1	2	1	2	2	4
21	0	12	9	1	5	3	3	4	2	3	3	3	3	4	4	3.22222	4	4	5	4	5	5	4	5	4	5	4.5	3	4	3	3	3	4	4	1	3	3	3.1	3	3	3	4	4	5	5	4	3	3	4
22	1	13	6	4	3	4	3	3	1	2	3	4	3	4	3	2.88889	3	3	3	1	2	3	3	3	1	2	2.4	3	2	4	5	3	3	3	3	4	3	3.3	4	3	4	5	4	4	5	5	6	2	5
23	1	12	5	4	5	4	1	4	4	3	2	1	3	3	3	2.66667	3	1	4	1	3	3	1	2	3	2	2.3	3	3	3	4	4	5	4	3	4	3	3.6	4	3	5	5	3	4	3	4	4	6	4
24	1	10	5	5	5	2	5	4	5	4	5	5	3	5	5	4.55556	4	4	5	5	4	4	5	4	5	4	4.4	5	5	3	5	5	5	5	5	5	4	4.7	5	5	5	5	6	5	5	5	5	5	4
25	0	11	1	3	1	2	4	4	5	3	4	5	4	4	4	4.11111	4	5	2	4	3	3	4	4	4	4	3.7	3	3	3	3	1	1	1	3	2	1	2.1	1	1	3	1	2	2	1	4	2	1	2
26	0	13	2	4	1	1	4	4	3	4	4	4	5	4	5	4.11111	2	2	3	3	3	3	4	3	3	3	2.9	3	2	3	3	3	3	3	2	1	1	2.4	3	6	4	4	4	4	5	3	5	3	3
27	1	10	7	4	4	5	4	4	3	2	3	4	3	4	4	3.44444	5	4	5	3	4	4	4	4	4	5	4.2	3	4	4	5	5	5	4	4	4	5	4.3	6	6	4	4	4	5	4	5	6	4	5
28	1	13	2	3	1	2	3	4	2	2	4	4	5	4	4	3.55556	5	4	4	5	5	4	5	4	5	5	4.6	4	5	3	4	5	5	5	5	4	5	4.5	4	4	3	5	5	6	4	5	4	4	6
29	0	10	1	4	2	3	5	3	4	3	5	5	4	4	4	4.11111	5	5	5	4	5	5	4	4	4	4	4.5	3	3	3	2	2	1	3	3	1	2	2.3	4	4	1	5	5	5	3	3	2	3	3
30	0	12	3	3	2	4	3	3	2	4	4	4	5	3	3	3.44444	4	5	4	5	4	3	5	5	5	5	4.5	4	3	4	4	3	4	4	4	3	4	3.7	1	3	2	2	2	2	3	1	3	2	4
31	1	13	3	1	3	1	4	4	4	3	4	4	4	4	3	3.77778	2	1	1	2	3	3	4	4	3	1	2.4	4	4	5	5	5	4	5	4	3	3	4.2	3	4	5	3	5	3	4	4	4	3	3
32	1	12	4	1	2	4	1	2	4	1	1	1	3	2	1	1.77778	4	4	3	3	4	4	4	4	3	5	3.8	5	4	5	5	5	5	5	5	4	5	4.8	4	5	5	4	6	4	5	6	4	5	5
33	1	14	1	2	1	1	5	5	5	4	4	5	5	5	5	4.77778	4	5	3	3	3	3	3	3	3	5	3.5	3	3	4	3	3	3	4	3	3	4	3.3	5	3	4	1	6	5	3	4	3	4	5
34	1	13	3	1	4	2	4	4	3	3	3	4	3	3	2	3.22222	3	2	4	1	2	2	3	3	3	3	2.6	3	3	5	3	1	3	3	4	3	3	3.1	5	6	5	4	5	4	5	4	4	6	4
35	1	12	9	2	3	1	1	1	4	2	2	3	2	1	2	2	5	4	5	5	4	5	5	4	5	5	4.7	5	5	5	5	5	5	5	5	4	5	4.9	1	1	1	1	3	4	3	1	3	2	2
36	0	12	10	1	4	3	4	5	4	4	3	5	4	4	4	4.11111	4	4	3	4	4	4	3	4	4	4	3.8	4	5	5	4	4	5	4	4	5	5	4.5	3	4	3	3	4	4	4	4	5	3	4
37	0	14	4	5	1	4	3	2	2	1	3	2	2	2	2	2.11111	2	3	3	3	3	1	1	3	3	3	2.5	3	4	3	3	4	4	3	4	4	4	3.6	4	6	5	6	5	6	4	4	4	4	4
38	1	13	3	3	2	2	5	5	4	4	4	4	4	5	4	4.33333	4	4	5	3	3	3	4	3	4	5	3.8	3	3	2	3	2	2	2	3	2	1	2.3	4	4	3	4	4	4	4	3	3	4	3
39	0	14	1	1	2	2	4	5	4	4	4	5	3	5	4	4.22222	4	4	4	5	5	4	5	4	3	5	4.3	1	3	3	3	3	4	4	1	3	1	2.6	5	3	3	1	3	5	2	5	3	4	4
40	1	11	3	4	1	1	2	4	4	2	2	2	3	3	3	2.77778	4	4	1	2	1	2	4	2	3	2	2.5	3	4	3	3	3	4	3	3	3	4	3.3	3	3	1	1	2	2	1	3	1	2	2
41	0	11	1	5	1	1	2	1	1	4	2	4	3	1	2	2.22222	5	4	5	3	4	5	4	5	3	3	4.1	4	4	5	5	4	5	5	4	4	5	4.5	4	3	4	3	5	4	2	4	4	3	4
42	0	12	1	3	1	2	4	4	5	4	4	5	3	4	4	4.11111	3	2	3	3	1	2	3	3	3	3	2.6	3	4	3	2	1	2	4	3	3	3	2.8	5	5	3	5	5	4	3	4	4	3	5
43	0	10	2	3	5	2	1	2	1	2	1	1	2	1	2	1.44444	5	5	4	5	5	4	5	5	5	5	4.8	5	4	4	3	4	5	5	4	4	4	4.2	4	4	3	3	4	5	5	4	3	2	5
44	1	14	6	2	5	5	5	5	5	5	5	5	5	5	5	5	5	3	3	4	5	4	4	4	3	4	3.9	1	3	3	2	1	3	3	3	2	3	2.4	4	4	1	4	4	3	5	4	4	3	3
45	0	12	7	1	1	3	4	3	4	4	4	4	4	3	5	3.88889	3	2	4	3	3	3	3	3	3	2	2.9	4	4	5	4	5	5	4	5	4	4	4.4	2	3	1	1	3	3	3	3	3	1	3
46	0	10	6	5	4	5	4	3	5	4	4	4	5	5	4	4.22222	3	2	4	2	3	3	4	3	4	3	3.1	4	3	4	4	3	5	4	4	3	4	3.8	3	1	3	4	3	4	4	4	4	4	4
47	0	10	5	4	2	2	4	2	3	4	3	4	5	4	3	3.55556	2	2	2	1	3	3	3	2	3	3	2.4	4	4	3	3	1	3	3	3	4	3	3.1	4	5	3	5	3	5	6	4	6	4	5
48	0	12	1	1	2	1	2	4	4	2	2	4	3	2	3	2.88889	3	3	4	3	3	3	4	3	3	3	3.2	5	4	3	5	4	4	4	5	5	5	4.4	4	4	3	6	4	6	2	4	3	4	3
49	1	14	3	2	2	5	5	4	4	4	5	5	5	5	4	4.55556	3	3	2	2	1	3	2	3	1	3	2.3	3	3	1	3	3	2	4	3	2	3	2.7	3	5	1	3	5	3	5	3	1	3	2
50	1	14	5	3	1	2	4	3	3	4	4	3	3	4	4	3.55556	4	4	5	4	5	5	4	5	4	4	4.4	4	5	5	5	4	5	4	5	4	3	4.4	2	3	2	3	3	2	3	3	3	2	2
51	0	13	3	1	4	3	3	2	2	1	3	3	3	2	2	2.33333	2	3	2	3	3	2	1	3	3	2	2.4	5	4	5	5	5	4	5	5	4	4	4.6	4	4	3	4	4	4	5	4	4	3	3
52	0	10	10	4	4	3	2	2	2	1	3	1	3	3	2	2.11111	3	4	3	3	4	4	3	4	3	4	3.5	5	4	5	5	5	5	4	5	5	4	4.7	4	6	4	5	4	6	5	4	6	6	5
53	1	13	10	1	1	3	3	3	3	4	5	5	3	5	4	3.88889	2	2	2	1	1	2	3	2	2	1	1.8	3	3	3	3	2	3	4	3	1	4	2.9	5	4	5	1	6	3	5	6	4	4	4
54	1	10	5	2	3	4	5	5	4	4	4	4	3	4	4	4.11111	1	1	1	2	3	2	3	3	3	2	2.1	3	2	3	2	2	4	3	3	3	3	2.8	4	4	3	3	4	6	5	4	4	3	4
55	1	12	1	2	1	1	2	1	3	2	1	2	2	2	1	1.77778	5	4	4	4	3	3	4	3	5	4	3.9	3	3	3	4	3	3	2	4	4	3	3.2	1	2	1	2	2	1	3	2	3	2	2
56	0	10	6	1	4	2	4	4	4	3	3	3	5	4	4	3.77778	5	4	5	3	4	4	5	4	2	4	4	4	5	4	5	3	5	4	4	4	4	4.2	3	4	1	4	2	3	3	4	4	4	5
57	1	14	1	1	1	1	3	2	3	3	2	4	4	4	2	3	4	5	4	3	4	4	4	4	4	4	4	3	1	3	3	3	4	3	4	3	2	2.9	5	5	3	5	6	6	5	5	4	5	5
58	0	12	2	2	2	3	3	3	1	5	3	3	2	4	2	2.88889	3	2	2	3	3	4	3	4	1	4	2.9	3	3	3	3	3	3	5	4	4	3	3.4	4	4	6	5	4	5	2	5	5	3	4
59	0	13	2	2	1	1	3	3	3	2	4	3	3	2	4	3	4	4	3	4	3	4	4	3	4	4	3.7	2	3	3	3	1	1	3	2	3	3	2.4	1	1	2	1	1	3	3	2	1	2	5
60	0	13	3	3	5	3	5	5	4	5	4	4	4	5	5	4.55556	2	2	3	1	3	2	1	3	2	3	2.2	3	3	2	3	1	1	3	3	1	4	2.4	3	2	2	2	3	3	1	1	1	3	3
61	0	12	1	1	1	1	1	2	2	2	1	1	1	2	3	1.66667	5	5	2	3	4	4	5	4	5	5	4.2	3	4	3	4	3	4	3	4	4	3	3.5	3	5	3	4	4	4	1	3	3	3	5
62	0	11	1	1	1	1	3	2	3	4	3	3	4	2	2	2.88889	2	1	1	3	3	2	2	2	4	4	2.4	2	2	3	3	1	3	3	4	3	3	2.7	4	4	3	4	5	6	5	6	4	4	6
63	1	13	6	1	3	1	5	5	5	5	5	4	4	5	5	4.77778	4	5	3	5	3	3	3	4	4	4	3.8	3	3	3	4	1	3	2	3	2	3	2.7	3	3	1	2	1	1	1	2	3	2	3
64	0	10	7	5	3	3	4	5	4	3	4	5	4	4	5	4.22222	2	1	2	1	2	1	2	2	1	2	1.6	3	3	3	3	3	2	3	3	1	1	2.5	3	3	3	3	3	4	6	4	4	2	4
65	1	10	6	1	4	2	5	5	5	4	5	5	5	5	5	4.88889	2	3	3	3	3	4	4	3	3	3	3.1	3	3	3	3	3	1	3	3	1	2	2.5	2	2	1	1	2	2	3	2	2	3	3
66	0	14	10	4	5	5	4	4	4	4	4	4	2	4	3	3.66667	5	4	5	4	5	5	5	4	4	5	4.6	5	5	5	5	5	5	5	5	5	4	4.9	4	4	3	4	5	4	5	5	5	4	3
67	1	11	3	4	5	2	3	3	4	4	4	4	3	4	3	3.55556	3	2	4	3	4	3	3	4	4	3	3.3	5	3	4	5	4	2	5	5	4	3	4	5	5	6	5	4	4	6	4	5	5	3
68	1	11	5	4	5	5	5	5	5	4	5	5	5	5	5	4.88889	5	4	5	4	5	4	4	4	4	4	4.3	5	5	4	4	3	3	5	5	3	3	4	4	3	3	4	3	5	3	4	5	3	2
69	1	13	10	3	4	2	3	3	4	5	3	3	4	2	4	3.44444	3	4	4	3	4	3	4	4	3	4	3.6	5	4	5	5	4	5	5	4	5	5	4.7	5	6	4	6	6	6	4	6	6	3	4
70	0	12	9	5	3	3	5	5	5	5	5	5	4	5	5	4.88889	2	2	1	1	3	2	2	3	1	1	1.8	1	2	3	3	3	1	3	3	1	3	2.3	2	2	2	1	2	3	3	2	3	4	4
71	0	13	1	1	2	1	4	4	4	3	4	4	4	4	3	3.77778	2	1	2	2	3	2	1	3	3	3	2.2	2	3	3	2	3	2	3	3	2	3	2.6	4	3	3	6	4	4	3	6	3	3	5
72	1	12	4	4	4	1	3	4	5	4	4	3	5	4	4	4	5	5	5	4	5	5	5	5	5	5	4.9	3	4	4	5	4	5	4	4	5	4	4.2	5	5	5	5	5	5	6	6	4	3	4
73	1	14	3	1	5	1	2	2	1	5	1	2	3	3	2	2.33333	5	4	2	3	3	4	5	4	3	4	3.7	3	4	4	4	3	4	4	4	3	4	3.7	3	3	3	4	3	3	3	4	3	3	3
74	1	10	6	4	3	5	4	1	3	5	5	4	4	3	4	3.66667	4	4	5	3	4	4	4	4	4	4	4	4	4	4	4	5	4	4	5	3	4	4.1	4	5	4	4	4	3	5	4	5	5	5
75	0	14	5	2	1	1	4	4	5	5	3	4	4	5	3	4.11111	5	3	5	5	4	4	3	3	4	4	4	3	3	3	3	3	3	1	1	1	3	2.4	2	2	2	2	3	1	3	1	2	3	3
76	1	12	10	2	4	1	1	3	1	2	2	2	3	2	2	2	5	5	5	5	3	5	5	4	5	5	4.7	3	4	4	4	3	4	4	3	4	4	3.7	3	3	3	2	3	3	3	4	4	3	4
77	1	10	1	1	1	1	5	4	5	2	5	4	4	5	5	4.33333	5	4	4	4	5	5	5	5	5	5	4.7	4	4	4	4	4	5	5	4	4	4	4.2	4	4	3	4	6	6	5	4	4	5	5
78	0	14	3	1	1	3	1	2	2	2	2	1	2	1	2	1.66667	4	3	3	3	3	4	1	3	4	5	3.3	3	3	3	3	4	4	3	4	4	3	3.4	5	3	4	6	5	4	6	6	3	3	5
79	1	13	10	5	5	5	3	2	2	1	3	1	4	2	3	2.33333	5	4	5	4	4	4	4	4	5	5	4.4	4	5	5	5	4	4	5	4	4	3	4.3	3	4	3	3	2	5	4	6	3	4	3
80	1	12	4	2	2	3	4	3	4	2	3	3	4	3	5	3.44444	5	3	4	5	4	4	4	4	2	4	3.9	3	3	3	3	3	3	4	3	3	4	3.2	1	2	1	3	3	1	1	2	2	1	2
81	1	12	2	1	2	1	5	5	5	5	5	5	5	5	5	5	3	4	4	3	5	5	3	4	5	5	4.1	4	4	3	3	3	4	4	4	4	3	3.6	4	5	4	4	4	3	5	4	3	3	3
82	1	13	4	1	2	1	5	4	4	3	5	4	4	5	5	4.33333	4	4	4	2	4	4	4	4	3	3	3.6	3	1	3	2	3	3	4	3	3	3	2.8	4	4	3	6	6	4	5	6	6	6	3
83	1	12	8	4	4	5	4	4	5	5	4	4	3	3	4	4	2	2	2	3	3	2	3	2	3	3	2.5	3	3	4	5	3	4	3	4	3	3	3.5	3	3	2	4	3	2	3	2	3	4	3
84	0	14	9	5	5	2	5	5	5	5	5	5	5	5	5	5	5	5	5	3	4	4	5	4	5	5	4.5	5	5	5	5	4	5	5	4	5	5	4.8	6	6	6	6	5	5	4	5	4	5	6
85	0	14	1	1	5	3	5	5	5	5	5	4	5	5	5	4.88889	4	4	5	3	2	3	4	4	4	3	3.6	3	3	3	3	1	3	1	1	3	2	2.3	3	1	1	1	3	3	2	1	3	2	3
86	0	10	10	5	4	3	5	4	4	4	4	5	5	4	4	4.33333	2	1	2	1	1	2	2	1	3	3	1.8	4	3	3	4	3	3	4	4	4	3	3.5	4	4	3	3	4	2	4	4	3	3	4
87	0	12	10	4	5	1	4	5	4	5	4	5	4	3	5	4.33333	5	5	5	3	5	5	4	4	4	4	4.4	5	5	5	5	4	5	5	4	4	5	4.7	5	3	4	5	5	6	5	6	4	3	5
88	1	14	3	3	5	5	5	4	5	3	5	5	4	5	5	4.55556	3	3	4	3	3	4	3	4	2	4	3.3	2	3	3	2	1	3	3	3	1	3	2.4	3	3	4	3	3	4	5	3	4	2	3
89	1	14	3	4	1	2	5	5	4	5	5	5	5	5	5	4.88889	4	3	3	5	4	4	5	4	4	4	4	4	4	4	5	4	3	4	3	3	4	3.8	5	4	4	6	5	5	6	5	5	6	5
90	1	12	5	5	5	3	5	5	4	3	5	5	5	5	5	4.66667	3	4	3	3	3	4	5	4	4	4	3.7	4	3	3	3	2	3	4	4	4	3	3.3	2	2	3	4	5	1	4	2	2	2	3
91	1	10	1	1	3	2	5	4	5	5	3	4	5	5	5	4.55556	4	4	4	3	4	4	3	3	5	3	3.7	3	3	3	3	4	5	4	4	3	4	3.6	3	4	2	4	3	3	3	4	4	2	4
92	1	13	4	4	3	3	4	3	3	4	2	2	3	4	2	3	3	1	2	2	4	4	3	3	3	1	2.6	4	5	3	3	3	2	3	4	2	3	3.2	4	4	3	4	4	6	4	6	6	4	6
93	0	13	1	2	1	1	1	3	2	1	1	1	3	3	2	1.88889	4	2	2	2	3	3	2	2	4	3	2.7	3	4	3	5	3	5	3	2	4	4	3.6	2	3	3	3	3	4	2	2	2	3	4
94	1	10	9	4	2	5	4	4	3	4	5	4	3	4	4	3.88889	5	3	5	4	4	4	4	4	4	4	4.1	3	4	3	4	3	3	3	4	4	3	3.4	2	3	3	3	3	2	4	1	3	2	1
95	0	14	5	1	1	2	4	5	5	4	4	4	3	4	4	4.11111	5	5	4	5	4	4	4	4	4	4	4.3	3	3	3	5	3	2	3	4	3	3	3.2	3	4	3	2	2	3	2	3	2	4	4
96	0	14	4	2	2	1	3	3	2	4	3	4	4	2	4	3.22222	5	5	5	5	5	5	5	5	4	5	4.9	5	4	4	5	5	5	5	5	4	4	4.6	4	4	1	3	4	4	5	3	4	3	4
97	1	13	5	5	5	5	2	2	3	2	3	2	2	1	2	2.11111	5	5	5	5	5	4	5	4	5	5	4.8	5	4	5	5	5	4	5	5	4	4	4.6	4	4	3	5	3	5	5	4	5	4	4
98	0	12	5	1	1	1	4	5	5	4	4	5	5	4	5	4.55556	4	3	5	3	4	4	4	4	4	4	3.9	2	3	2	3	2	1	3	3	1	1	2.1	2	2	2	1	4	2	4	3	3	1	3
99	0	10	9	3	4	5	2	2	3	2	3	3	3	2	2	2.44444	5	5	4	4	3	3	3	4	4	4	3.9	4	5	4	5	5	5	5	4	4	4	4.5	6	6	4	5	5	4	5	5	6	5	6
100	0	11	2	2	5	3	3	2	2	1	3	2	2	3	2	2.22222	2	1	1	1	2	3	3	3	3	3	2.2	5	5	5	5	5	5	5	5	4	5	4.9	1	2	1	2	1	2	1	3	2	3	2
101	0	13	2	2	2	2	5	5	5	5	5	5	5	4	5	4.88889	1	3	2	3	1	3	3	3	4	3	2.6	3	4	3	5	4	4	5	4	4	4	4	3	4	2	4	5	5	4	4	5	3	3
102	1	12	4	3	5	2	5	5	5	5	5	5	5	5	5	5	3	2	4	3	3	3	3	3	4	4	3.2	4	4	4	4	5	5	4	5	5	5	4.5	6	4	4	6	4	5	5	5	6	4	4
103	0	12	4	4	2	2	4	2	5	5	5	4	5	3	4	4.11111	5	5	5	3	4	4	4	4	4	5	4.3	4	4	4	4	5	3	3	3	3	4	3.7	3	3	4	5	3	3	6	4	3	3	4
104	1	11	5	3	4	4	3	3	3	3	3	4	3	4	4	3.33333	5	5	5	4	5	5	5	5	4	5	4.8	5	4	4	4	5	5	5	4	5	5	4.6	5	4	4	5	5	4	5	6	4	4	4
105	1	11	7	2	4	5	2	3	2	2	2	2	3	2	2	2.22222	2	1	4	3	3	3	4	3	4	2	2.9	5	3	3	4	3	5	4	3	4	5	3.9	3	2	3	2	3	1	2	3	3	3	1
106	0	13	7	1	3	1	2	2	1	2	1	1	3	1	1	1.55556	5	4	4	4	4	4	5	4	5	4	4.3	4	5	4	5	4	5	4	4	4	4	4.3	3	3	4	1	5	4	3	5	4	4	2
107	0	13	4	4	2	4	4	5	4	4	4	5	5	5	5	4.55556	2	3	2	1	3	3	3	3	1	3	2.4	1	3	3	3	3	3	3	1	2	3	2.5	6	5	4	4	6	5	5	5	4	3	4
108	1	11	4	2	2	1	5	5	4	4	4	4	4	3	5	4.22222	5	5	4	4	5	5	5	4	4	5	4.6	3	3	3	4	3	3	4	3	3	4	3.3	3	3	3	3	2	4	4	3	4	3	3
109	1	14	1	2	1	2	5	5	5	4	5	5	5	5	5	4.88889	5	4	5	4	5	4	5	4	4	5	4.5	4	3	3	3	3	4	4	4	3	4	3.5	4	4	6	4	6	5	4	5	3	4	5
110	0	14	2	2	4	3	4	4	3	2	5	5	4	4	2	3.66667	3	5	4	3	4	4	4	4	5	4	4	4	4	3	4	3	5	4	4	3	3	3.7	1	2	3	4	3	2	2	1	2	1	1
111	0	13	9	3	5	2	2	2	1	2	2	1	3	2	2	1.88889	4	5	5	3	5	5	4	4	5	5	4.5	4	3	4	3	4	4	4	3	3	5	3.7	4	4	4	2	2	4	3	5	3	5	6
112	1	14	3	3	2	1	1	3	1	2	1	3	1	3	2	1.88889	5	4	5	4	4	4	4	4	5	5	4.4	5	4	4	5	5	5	5	5	4	5	4.7	5	6	3	5	6	5	5	6	5	4	4
113	1	12	10	4	4	5	3	1	2	5	1	1	2	3	2	2.22222	3	4	2	2	4	3	3	3	3	4	3.1	5	5	3	5	4	4	4	4	4	4	4.2	4	3	2	4	5	3	2	6	4	4	4
114	0	13	7	5	3	4	5	5	5	5	5	4	5	5	5	4.88889	4	4	3	3	4	3	4	4	4	4	3.7	5	4	5	4	4	5	5	4	4	4	4.4	6	4	4	5	5	4	3	4	4	4	4
115	0	12	2	2	1	2	1	3	2	2	3	2	3	2	2	2.22222	3	2	1	2	4	2	3	3	4	3	2.7	4	5	5	5	4	4	4	5	4	4	4.4	2	3	3	5	4	1	3	2	1	2	1
116	1	12	1	2	4	3	4	4	5	3	4	5	4	3	3	3.88889	3	3	4	3	3	3	3	3	1	2	2.8	5	4	4	3	4	5	4	4	5	5	4.3	3	4	3	4	4	4	4	3	4	3	3
117	1	10	1	5	2	2	5	5	4	5	5	5	5	4	4	4.66667	4	3	4	3	4	5	5	4	4	5	4.1	4	5	4	3	4	5	4	5	3	5	4.2	4	4	4	5	4	4	5	5	5	3	6
118	1	10	4	1	5	4	2	2	2	2	1	2	1	3	2	1.88889	4	5	5	4	4	4	5	4	4	4	4.3	4	4	3	4	4	5	5	4	5	5	4.3	3	3	4	2	3	4	3	3	3	4	6
119	0	10	10	2	2	2	5	5	5	3	5	5	5	5	5	4.77778	2	5	3	3	4	3	4	4	3	4	3.5	3	1	4	3	3	3	3	3	3	1	2.7	3	5	1	2	2	3	4	3	3	1	1
120	1	11	1	2	1	2	3	4	4	3	5	5	2	2	1	3.22222	4	4	4	5	4	4	5	5	4	4	4.3	3	4	4	4	4	3	5	4	4	2	3.7	2	2	2	1	2	3	3	2	1	3	2
121	0	11	6	2	3	3	3	4	1	4	4	5	4	4	4	3.66667	3	3	3	1	2	3	3	2	3	2	2.5	3	4	3	4	5	3	4	4	4	3	3.7	4	4	2	3	2	3	5	4	4	4	4
122	0	11	1	3	3	3	3	5	2	2	3	3	2	2	2	2.66667	4	3	3	3	3	3	3	4	3	4	3.3	3	4	4	3	4	4	3	3	3	3	3.4	5	3	3	4	6	5	5	6	5	4	5
123	0	10	4	3	3	4	5	4	4	4	4	3	4	4	4	4	2	1	1	1	3	1	3	2	1	3	1.8	3	3	3	3	3	1	3	3	1	1	2.4	5	4	4	4	6	4	5	4	2	3	4
124	0	14	9	5	5	5	1	2	1	1	2	2	2	2	3	1.77778	4	3	4	3	4	3	4	5	4	4	3.8	5	5	5	5	5	5	5	5	4	5	4.9	3	3	4	2	4	3	1	1	3	3	2
125	1	14	4	1	1	1	3	2	4	2	4	3	2	4	3	3	4	3	4	2	5	4	3	4	4	3	3.6	3	3	3	3	3	3	2	2	2	3	2.7	2	2	2	1	1	1	1	3	2	1	3
126	0	10	5	4	4	2	4	3	5	4	5	4	5	5	5	4.44444	3	4	5	3	3	3	4	3	4	4	3.6	3	3	3	1	3	1	3	3	1	3	2.4	3	4	3	3	3	5	4	3	3	4	4
127	0	14	8	2	5	2	5	5	5	3	5	5	5	5	3	4.55556	4	5	5	5	5	4	5	5	4	5	4.7	4	4	4	5	5	5	4	4	5	5	4.5	6	5	4	4	6	4	6	4	6	4	4
128	1	14	5	1	2	1	4	4	5	3	4	5	5	5	4	4.33333	5	4	5	4	5	4	5	4	4	4	4.4	3	1	4	3	4	4	4	4	5	3	3.5	5	4	4	4	4	5	4	6	4	4	3
129	1	12	7	5	2	2	1	2	2	2	2	2	1	2	2	1.77778	5	5	5	4	4	5	5	4	4	5	4.6	5	5	5	5	5	5	4	5	5	5	4.9	4	6	5	4	6	4	5	4	5	5	6
130	0	10	6	1	1	3	5	4	4	4	5	5	5	5	5	4.66667	4	4	3	3	4	3	4	4	4	3	3.6	3	4	4	4	3	4	5	4	3	2	3.6	1	2	3	4	1	2	2	3	2	1	2
131	0	14	10	3	5	5	4	5	4	4	5	2	5	5	5	4.33333	4	3	2	2	3	3	2	3	1	3	2.6	3	3	3	3	3	3	2	2	4	2	2.8	3	3	3	4	4	4	4	4	3	1	3
132	1	14	4	3	1	1	4	2	2	1	3	2	3	4	2	2.55556	3	3	4	3	3	2	4	3	4	3	3.2	3	3	3	3	3	4	3	3	2	3	3	5	6	6	3	4	4	4	5	6	4	5
133	0	11	9	1	1	2	4	4	4	3	4	3	4	4	5	3.88889	5	4	3	5	4	4	5	4	3	4	4.1	4	4	4	4	3	5	5	4	4	4	4.1	3	5	3	6	5	5	3	5	4	4	4
134	0	14	8	4	5	5	4	1	5	4	3	3	4	2	3	3.22222	3	4	4	4	3	3	5	3	4	2	3.5	5	5	5	5	5	5	5	5	4	5	4.9	5	5	6	6	6	4	4	4	4	3	5
135	0	13	5	2	1	4	3	1	4	3	4	3	3	3	3	3	4	5	4	4	4	5	5	4	4	4	4.3	3	3	3	4	3	3	2	3	3	3	3	3	2	3	1	2	2	1	3	3	1	2
136	1	10	2	1	1	1	2	3	2	4	1	3	1	3	2	2.33333	2	2	3	1	2	3	3	3	3	3	2.5	5	5	5	5	4	5	4	5	4	5	4.7	5	4	2	4	5	5	5	4	4	3	4
137	0	12	9	3	4	5	5	5	4	4	4	5	5	5	4	4.55556	4	5	5	4	4	3	5	4	5	4	4.3	4	4	4	3	4	3	4	4	4	3	3.7	5	5	6	4	5	4	5	6	5	5	4
138	0	14	7	4	5	4	3	4	4	4	1	3	3	2	2	2.88889	3	2	4	3	3	4	1	3	4	1	2.8	4	5	5	4	4	4	5	3	4	4	4.2	3	3	4	4	5	3	3	5	4	4	3
139	0	13	2	1	1	1	2	4	3	3	3	3	3	2	3	2.88889	5	4	4	5	5	4	5	4	5	4	4.5	4	4	4	5	5	5	4	5	4	5	4.5	6	6	5	5	6	6	4	6	4	3	4
140	1	13	2	1	1	1	5	5	4	5	5	5	4	5	4	4.66667	3	4	5	4	3	5	3	4	3	5	3.9	3	3	2	3	2	2	3	3	3	3	2.7	3	3	2	2	2	2	4	1	4	1	1
141	1	12	2	3	1	2	3	3	3	2	3	3	3	3	4	3	4	5	5	3	5	4	3	5	4	5	4.3	4	4	5	5	5	5	3	4	4	5	4.4	3	4	5	3	4	2	4	4	4	2	3
142	1	10	2	2	1	1	5	4	5	5	5	4	5	5	5	4.77778	5	5	5	4	3	4	5	4	4	4	4.3	3	3	3	2	3	3	3	2	3	3	2.8	5	6	5	6	4	6	5	4	4	4	4
143	0	13	7	1	3	2	3	2	1	4	2	2	2	2	4	2.44444	2	3	3	2	3	2	3	2	3	2	2.5	4	5	5	5	4	5	4	5	5	4	4.6	3	3	2	2	4	3	3	4	4	1	1
144	1	12	9	4	2	2	3	2	2	4	3	3	2	2	2	2.55556	5	5	4	5	5	5	4	5	5	5	4.8	4	5	5	5	5	5	5	5	5	5	4.9	5	4	6	5	3	5	5	4	6	6	5
145	0	10	3	1	2	2	3	2	2	3	4	4	3	3	2	2.88889	4	5	5	4	4	4	5	4	4	5	4.4	4	5	4	5	5	5	5	4	4	5	4.6	3	1	2	3	3	1	3	2	2	3	2
146	0	12	1	1	2	3	4	3	3	2	3	5	4	2	3	3.22222	2	3	2	3	1	3	3	3	3	2	2.5	2	3	1	3	3	2	3	4	4	3	2.8	4	3	3	4	3	2	4	4	5	4	5
147	1	11	6	5	3	4	1	4	2	3	1	4	3	2	3	2.55556	3	3	3	3	3	2	3	2	3	4	2.9	3	3	5	4	4	5	4	4	4	4	4	5	4	4	5	3	4	4	6	6	2	4
148	1	11	2	2	2	1	5	5	5	5	5	5	5	3	5	4.77778	2	2	1	3	2	1	3	3	3	3	2.3	2	1	3	4	2	3	2	3	3	3	2.6	3	3	2	3	1	4	2	3	3	4	4
149	1	13	5	5	5	5	4	4	4	5	3	4	4	3	2	3.66667	2	2	1	3	3	1	2	3	2	2	2.1	3	4	3	4	4	2	3	4	3	3	3.3	4	4	6	6	6	4	6	5	5	4	5
150	0	13	2	1	1	3	3	4	1	3	4	3	3	4	4	3.22222	3	2	1	3	3	4	3	3	3	4	2.9	4	5	4	3	4	3	4	3	2	1	3.3	2	2	1	4	2	4	3	3	2	1	2
151	1	13	2	2	4	2	2	1	3	4	2	3	3	1	2	2.33333	4	4	3	3	4	4	4	4	4	4	3.8	3	3	3	3	2	3	3	1	3	3	2.7	4	4	3	4	5	6	3	5	3	1	2
152	1	10	9	3	2	4	5	5	5	3	5	5	5	5	4	4.66667	3	3	4	3	3	4	4	3	4	4	3.5	3	2	3	3	3	3	3	3	4	3	3	5	5	4	5	4	4	4	4	4	3	5
153	0	14	6	4	3	3	5	5	5	5	5	5	5	5	5	5	4	4	4	4	4	4	3	4	5	4	4	5	5	4	4	4	5	4	4	5	4	4.4	4	4	5	6	4	5	5	4	2	3	6
154	0	14	9	5	2	5	5	5	4	4	4	5	3	5	4	4.33333	2	1	1	1	3	3	2	3	3	3	2.2	3	3	3	4	3	4	4	3	3	3	3.3	3	2	3	3	4	2	2	3	2	2	2
155	0	12	3	2	1	2	4	5	3	3	4	3	4	4	4	3.77778	2	3	3	3	1	3	4	3	3	1	2.6	3	2	3	4	2	3	3	3	1	4	2.8	3	3	3	3	2	1	5	4	2	1	3
156	0	13	4	4	1	2	2	2	4	2	3	3	3	2	2	2.55556	1	3	1	3	2	2	3	3	2	2	2.2	4	4	4	4	4	5	4	5	4	4	4.2	4	3	4	4	4	2	3	4	4	4	3
157	1	12	2	1	2	5	5	5	5	5	4	5	5	5	5	4.88889	3	4	4	3	3	3	3	3	3	2	3.1	4	4	4	5	5	4	5	5	5	4	4.5	5	5	3	5	6	4	4	6	6	5	5
158	0	13	5	5	5	5	1	3	2	4	4	5	3	4	3	3.22222	2	2	2	3	3	1	1	3	1	3	2.1	5	5	5	4	4	5	5	5	4	5	4.7	3	3	1	4	2	2	2	4	1	2	5
159	1	10	2	1	1	1	4	4	3	3	4	4	3	3	2	3.33333	3	4	4	3	4	4	3	3	3	4	3.5	3	3	2	3	4	3	3	3	2	3	2.9	3	3	2	3	1	2	4	3	3	3	3
160	0	13	7	2	3	2	5	4	5	5	5	5	4	5	3	4.55556	4	5	3	3	4	3	3	3	4	4	3.6	4	3	4	4	4	4	3	4	2	4	3.6	3	2	2	1	2	1	3	3	2	1	4
161	0	14	1	1	2	1	2	3	3	4	1	4	2	2	2	2.55556	2	1	4	1	1	3	3	3	2	3	2.3	1	3	3	4	1	2	4	3	3	4	2.8	4	4	1	3	3	3	2	5	6	2	4
162	1	11	3	4	4	2	4	3	3	5	3	3	4	4	4	3.66667	1	1	3	1	2	1	3	2	3	2	1.9	3	3	4	1	2	4	4	3	4	3	3.1	6	4	4	6	5	6	6	4	6	4	4
163	0	10	7	4	4	5	4	5	3	2	4	3	4	4	4	3.66667	2	2	1	3	2	4	4	3	3	3	2.7	4	4	3	4	3	4	4	4	4	1	3.5	3	2	3	6	4	3	4	3	2	2	3
164	0	13	7	2	5	5	5	5	5	5	4	5	5	5	5	4.88889	3	5	2	4	3	4	4	5	4	3	3.7	5	5	3	5	5	5	5	4	4	5	4.6	5	6	4	4	6	6	5	5	6	5	5
165	1	13	10	3	5	5	1	2	2	4	3	3	2	4	2	2.55556	4	1	2	3	1	3	1	3	4	2	2.4	4	5	4	4	4	5	3	5	4	4	4.2	2	3	3	1	1	1	1	1	2	3	1
166	0	14	9	5	5	4	4	2	1	4	3	1	3	4	3	2.77778	4	4	4	3	4	4	5	5	5	4	4.2	4	5	5	5	5	4	5	4	5	5	4.7	3	4	3	4	4	4	3	3	4	3	3
167	0	11	5	3	5	4	2	2	2	3	2	2	5	4	5	3	2	2	1	3	3	3	1	3	1	3	2.2	3	4	3	4	4	5	3	3	3	3	3.5	6	4	3	5	3	6	4	4	4	6	6
168	1	12	1	2	2	2	5	5	4	3	5	5	4	5	5	4.55556	2	2	1	1	1	1	1	2	3	3	1.7	3	3	3	3	1	2	1	1	3	1	2.1	2	3	1	1	1	3	2	3	3	2	2
169	1	14	7	5	3	3	2	4	4	2	1	3	3	1	2	2.44444	3	5	5	3	3	3	3	4	3	4	3.6	4	4	4	5	5	4	4	5	3	4	4.2	4	6	5	5	3	4	4	4	4	4	5
170	0	12	9	4	1	1	4	3	3	4	4	4	4	5	5	4	3	2	2	2	3	1	3	2	4	1	2.3	4	4	3	5	4	4	3	4	3	4	3.8	3	2	3	3	2	4	3	1	3	3	1
171	0	13	4	5	1	2	3	3	3	3	3	4	4	3	4	3.33333	2	2	2	2	4	3	3	3	2	2	2.5	3	3	3	4	3	4	3	3	3	4	3.3	3	3	4	1	3	3	4	4	3	4	3
172	0	13	1	2	2	2	5	5	4	3	4	4	4	4	5	4.22222	5	4	5	4	5	5	5	5	5	4	4.7	3	4	3	4	3	5	4	3	3	4	3.6	5	5	6	6	6	4	5	4	5	5	4
173	0	14	2	1	5	4	4	3	3	5	5	5	3	2	3	3.66667	5	4	5	4	5	5	5	5	5	5	4.8	5	4	4	5	4	5	4	5	4	5	4.5	4	3	1	4	4	2	4	4	5	4	3
174	1	13	1	1	2	1	5	5	5	5	4	5	5	5	5	4.88889	3	2	3	3	3	3	3	3	1	4	2.8	1	3	1	3	3	2	2	2	1	3	2.1	4	1	3	4	3	3	4	6	2	3	4
175	1	14	2	4	2	1	3	4	3	5	2	4	3	4	4	3.55556	2	2	1	1	3	1	2	3	1	2	1.8	3	3	3	3	3	2	4	3	1	3	2.8	1	2	2	2	3	3	3	3	3	3	3
176	0	11	2	5	3	3	5	4	5	5	5	5	5	5	5	4.88889	4	1	4	3	4	4	4	3	3	5	3.5	3	3	2	1	4	3	4	3	3	3	2.9	3	3	3	4	5	4	3	5	3	3	3
177	1	13	9	4	3	4	5	5	5	5	5	5	5	3	5	4.77778	4	5	4	4	4	3	4	4	4	4	4	3	3	3	3	3	4	3	3	1	3	2.9	5	5	4	6	5	5	5	4	4	3	5
178	1	11	6	4	2	5	5	5	4	4	5	4	5	5	5	4.66667	4	4	3	4	3	5	5	4	4	4	4	3	2	4	3	1	3	3	1	3	2	2.5	4	4	3	3	4	3	4	4	3	4	3
179	0	10	10	4	5	2	4	4	4	4	4	5	4	5	4	4.22222	5	5	5	4	5	5	5	5	4	5	4.8	4	4	3	5	5	5	3	3	4	4	4	4	6	3	5	5	4	6	4	5	6	4
180	0	11	5	5	1	2	1	1	1	2	3	3	3	3	2	2.11111	3	3	3	2	3	3	3	2	3	4	2.9	5	5	5	5	4	5	3	5	5	5	4.7	3	3	2	2	3	3	3	2	3	3	3
181	0	11	8	5	5	5	3	2	2	4	2	4	4	4	3	3.11111	3	2	4	2	3	3	3	3	1	4	2.8	4	4	5	5	5	5	5	5	4	4	4.6	4	3	3	5	3	6	3	5	5	2	4
182	1	11	10	2	1	2	4	5	4	3	5	5	5	5	5	4.55556	4	5	5	4	4	4	4	4	4	4	4.2	5	4	5	5	5	4	4	5	4	5	4.6	5	3	3	5	5	6	6	5	6	5	4
183	0	12	3	5	4	1	5	5	5	4	5	5	4	5	4	4.66667	3	2	3	3	3	1	3	3	3	3	2.7	1	3	1	3	3	3	1	3	3	2	2.3	4	4	3	2	4	4	5	4	3	4	3
184	0	13	3	2	1	1	5	4	4	5	5	5	3	5	5	4.55556	3	2	3	3	3	3	4	2	3	1	2.7	1	1	3	3	3	1	4	2	1	3	2.2	2	3	3	3	2	3	4	4	4	2	1
185	0	10	2	3	2	1	1	3	2	2	2	2	2	1	2	1.88889	2	3	2	3	3	3	3	3	4	4	3	5	5	5	5	5	5	5	5	5	4	4.9	2	2	1	3	2	1	2	1	3	2	2
186	1	14	5	2	3	1	2	2	4	2	3	3	3	2	2	2.55556	5	5	5	5	5	5	4	5	4	5	4.8	5	4	5	4	5	5	5	5	5	4	4.7	3	4	4	5	5	3	4	4	3	4	4
187	0	11	8	2	2	4	3	3	2	5	4	3	3	4	3	3.33333	2	2	4	3	4	3	1	3	3	3	2.8	3	3	3	4	5	3	4	4	3	3	3.5	5	5	6	5	5	4	5	4	4	4	5
188	0	14	5	1	5	4	2	4	3	3	3	2	2	2	3	2.66667	5	5	5	5	4	5	5	5	5	5	4.9	4	5	4	3	3	4	4	4	4	3	3.8	3	3	4	5	4	4	4	4	4	3	4
189	1	12	5	4	2	4	5	4	4	4	4	5	5	5	4	4.44444	4	4	4	4	4	5	5	4	5	4	4.3	5	4	5	5	5	5	5	5	4	4	4.7	5	6	4	3	6	6	5	5	4	6	5
190	0	13	4	3	1	1	4	4	5	4	5	4	4	5	3	4.22222	3	4	3	3	3	3	3	3	4	5	3.4	3	3	3	3	4	4	3	4	4	3	3.4	3	3	2	2	1	3	4	3	3	1	4
191	0	11	5	4	1	1	3	2	1	2	3	2	2	3	2	2.22222	3	5	2	5	4	4	3	4	5	5	4	4	4	3	5	4	5	4	5	4	4	4.2	3	3	4	3	3	4	6	3	3	4	2
192	1	12	2	2	4	4	4	4	4	2	4	4	3	4	4	3.66667	5	5	5	4	4	4	5	5	4	5	4.6	4	5	5	4	4	5	4	4	4	4	4.3	5	4	4	4	4	4	5	4	5	3	4
193	0	13	1	3	5	1	3	3	3	2	3	3	2	3	3	2.77778	4	2	3	3	3	3	3	4	5	3	3.3	3	4	4	3	5	5	4	4	3	5	4	4	5	4	4	5	4	3	5	5	4	4
194	1	13	1	3	5	4	5	4	4	5	5	5	5	5	5	4.77778	3	1	2	1	3	3	3	3	4	1	2.4	1	2	2	3	3	1	3	1	2	3	2.1	4	2	4	3	4	5	5	4	1	4	4
195	1	12	2	3	2	3	1	2	2	1	3	2	3	2	2	2	3	3	2	4	4	4	4	4	4	4	3.6	3	4	4	4	4	4	4	4	3	3	3.7	3	1	1	3	3	2	1	3	3	2	3
196	1	13	1	5	4	5	3	2	4	4	2	2	4	3	3	3	5	4	5	5	5	4	5	5	5	4	4.7	4	4	4	4	4	4	4	4	4	4	4	4	3	3	5	6	4	5	4	4	3	4
197	0	12	1	1	1	3	3	2	3	3	3	1	2	3	4	2.66667	5	5	5	5	5	5	5	5	5	5	5	3	3	4	3	3	4	3	5	4	4	3.6	6	4	4	4	6	6	6	6	4	4	4
198	1	12	2	4	3	3	4	3	3	4	4	5	5	4	5	4.11111	3	4	5	3	4	4	3	4	3	4	3.7	4	3	4	5	3	5	4	4	4	5	4.1	3	3	2	3	1	2	3	5	3	4	4
199	0	13	5	1	1	1	2	4	1	4	4	4	2	3	3	3	4	3	4	4	4	4	5	5	4	5	4.2	3	2	3	4	5	4	3	3	2	4	3.3	2	2	2	1	2	4	1	3	2	1	2
200	1	13	8	1	2	2	4	4	5	4	4	3	4	4	4	4	4	5	3	3	4	4	4	5	5	4	4.1	3	5	3	4	4	4	4	3	3	3	3.6	3	3	2	1	4	1	4	2	3	1	3
201	0	13	9	1	5	4	5	5	5	5	5	4	4	4	5	4.66667	3	3	4	4	3	4	5	4	3	2	3.5	4	5	4	5	5	5	4	4	4	4	4.4	3	1	2	3	5	5	5	4	3	3	3
202	1	13	1	1	1	1	5	5	4	4	4	4	5	4	5	4.44444	5	5	5	5	4	5	5	4	4	4	4.6	4	4	2	4	4	4	4	5	5	4	4	6	3	3	5	4	4	6	4	5	4	6
203	1	14	3	2	1	1	5	5	4	5	5	5	3	5	3	4.44444	1	1	2	1	2	1	2	2	1	3	1.6	3	3	3	3	1	3	3	3	3	2	2.7	3	2	2	3	4	4	4	3	4	3	5
204	1	12	1	4	3	1	3	1	5	3	3	3	3	2	2	2.77778	4	5	5	5	4	5	4	5	4	4	4.5	3	3	3	3	3	1	3	4	3	3	2.9	4	4	1	5	2	4	4	4	5	4	5
205	0	10	4	4	4	2	4	2	4	3	4	1	2	4	3	3	3	3	3	3	3	3	1	4	4	4	3.1	5	4	5	5	5	5	4	4	5	4	4.6	2	3	2	2	2	2	3	1	1	2	4
206	1	10	1	5	2	1	3	3	4	5	3	5	3	4	2	3.55556	4	5	5	4	4	5	5	4	4	4	4.4	4	4	4	4	4	5	4	4	4	4	4.1	4	3	3	3	4	3	4	3	4	4	4
207	1	14	10	4	4	5	3	4	2	3	3	1	3	2	4	2.77778	4	5	5	4	4	5	4	4	4	4	4.3	3	4	4	5	5	5	4	3	3	3	3.9	5	3	5	5	5	4	5	6	3	5	5
208	1	12	2	3	2	5	4	3	4	3	2	3	3	2	3	3	2	3	4	2	3	3	3	1	3	3	2.7	3	4	4	4	3	4	4	4	4	4	3.8	4	4	3	5	3	4	4	3	4	4	3
209	0	10	2	2	1	3	5	5	4	4	4	4	3	5	4	4.22222	5	5	5	3	4	4	4	4	5	4	4.3	5	4	4	5	5	4	5	4	3	4	4.3	6	5	6	6	6	5	5	4	5	6	4
210	1	10	5	1	1	2	5	5	5	5	5	5	4	5	4	4.77778	2	2	2	3	2	3	2	4	4	4	2.8	4	3	3	1	3	1	3	3	3	3	2.7	2	1	3	2	3	1	1	1	1	3	3
211	1	10	6	1	3	1	4	5	4	4	4	5	4	4	5	4.33333	1	2	1	1	3	3	3	3	3	4	2.4	4	4	3	4	3	5	4	5	3	3	3.8	4	4	4	4	5	2	4	4	4	4	5
212	1	10	1	3	3	1	3	2	2	3	3	2	3	2	2	2.44444	5	5	5	5	5	5	5	5	5	4	4.9	4	5	4	4	4	4	4	4	4	4	4.1	5	4	5	4	6	4	6	4	5	5	5
213	1	12	10	5	5	5	5	2	4	3	3	5	3	5	3	3.66667	2	2	2	1	2	2	2	2	1	3	1.9	4	3	5	4	4	4	4	4	3	3	3.8	3	3	3	3	2	3	1	3	4	2	3
214	0	14	3	2	4	3	4	4	5	4	4	4	4	5	3	4.11111	5	5	5	5	5	4	5	5	4	4	4.7	3	3	4	3	3	4	3	3	1	3	3	4	3	2	4	3	3	5	5	3	5	4
215	1	12	7	4	5	5	3	3	3	3	2	3	2	1	1	2.33333	3	2	3	3	3	3	2	3	3	4	2.9	4	4	4	4	5	5	4	4	3	4	4.1	3	1	2	3	1	3	3	3	3	3	3
216	1	10	6	4	4	3	3	3	3	3	3	2	2	2	4	2.77778	3	3	2	3	4	3	2	4	3	4	3.1	5	5	4	3	5	4	5	4	4	4	4.3	4	3	5	4	5	4	4	4	2	4	3
217	0	10	1	3	2	1	5	4	5	4	4	4	4	5	4	4.33333	4	5	5	5	4	4	4	4	5	4	4.4	3	3	3	1	2	1	4	4	2	1	2.4	5	5	6	4	4	5	5	6	4	4	5
218	1	14	4	1	4	1	5	4	5	4	4	5	5	5	5	4.66667	3	1	4	3	3	3	3	3	3	3	2.9	3	3	3	5	4	4	4	3	3	3	3.5	3	2	3	3	3	2	1	1	1	3	4
219	0	12	5	1	3	1	5	3	3	3	4	4	1	5	2	3.33333	3	1	2	1	2	3	4	2	2	2	2.2	3	3	4	3	3	3	3	2	3	1	2.8	3	3	3	4	3	3	4	4	3	4	4
220	0	14	5	4	5	3	2	3	3	3	3	1	3	2	3	2.55556	5	4	5	3	4	5	5	4	4	4	4.3	3	3	4	5	3	5	4	2	4	4	3.7	2	3	3	2	2	2	1	2	2	3	4
221	1	14	2	2	1	1	2	3	3	2	3	2	5	3	4	3	5	3	5	3	4	4	3	4	4	4	3.9	5	4	4	4	4	5	4	4	3	3	4	4	3	4	5	5	4	4	4	4	3	4
222	1	14	6	4	4	4	3	3	4	3	2	4	1	3	2	2.77778	3	3	2	3	3	4	4	3	3	3	3.1	5	5	4	5	4	4	5	5	5	4	4.6	5	5	4	5	6	4	6	5	4	4	5
223	0	12	10	3	5	5	5	4	4	4	4	5	4	4	4	4.22222	3	4	5	4	5	4	3	5	3	4	4	3	4	3	1	3	4	3	3	3	3	3	4	3	3	6	6	3	6	3	4	3	4
224	0	11	9	3	3	3	1	2	3	3	4	1	4	3	2	2.55556	2	2	2	1	2	3	1	3	1	3	2	4	3	3	5	4	5	4	4	5	5	4.2	4	1	4	3	4	3	2	4	3	3	2
225	0	13	7	2	1	1	3	3	3	3	2	2	3	2	1	2.44444	2	2	3	3	3	3	3	3	4	2	2.8	3	3	3	2	3	3	4	3	3	3	3	3	1	2	4	1	2	2	3	2	1	3
226	1	13	1	1	1	1	4	4	5	4	5	3	3	4	5	4.11111	3	4	2	2	1	3	2	3	3	3	2.6	3	3	3	3	1	1	3	3	2	3	2.5	3	4	4	3	6	4	6	5	4	4	4
227	0	10	10	5	3	5	3	4	4	4	4	4	5	4	3	3.88889	3	4	1	2	3	3	4	4	4	2	3	4	3	3	3	4	4	3	3	3	2	3.2	6	4	5	6	6	4	5	6	5	3	5
228	1	10	4	3	2	1	5	3	5	4	3	5	5	5	5	4.44444	4	4	3	3	3	4	4	4	4	4	3.7	4	4	4	4	3	5	5	4	4	3	4	3	4	3	2	3	4	4	3	3	3	3
229	1	13	10	2	5	5	5	5	5	5	5	5	5	5	5	5	4	4	4	3	5	4	5	4	3	4	4	5	5	5	5	5	5	5	5	5	4	4.9	5	5	4	4	5	5	6	4	6	5	5
230	1	12	1	3	2	1	4	4	4	4	3	3	3	3	4	3.55556	3	1	2	1	1	3	3	2	3	3	2.2	3	4	3	3	3	2	3	1	3	3	2.8	1	1	4	4	1	3	4	3	1	1	3
231	1	10	8	5	5	5	2	2	3	2	2	1	3	4	2	2.33333	2	2	2	3	3	3	1	3	3	3	2.5	4	4	5	4	4	5	5	5	5	4	4.5	4	4	4	4	3	5	3	3	3	3	6
232	0	13	6	3	5	2	2	3	2	1	1	1	1	2	2	1.66667	5	5	5	5	5	5	5	5	5	5	5	5	4	5	5	5	5	5	4	5	4	4.7	5	4	5	6	5	5	5	3	4	6	6
233	1	12	1	1	1	1	5	4	3	5	4	3	5	4	4	4.11111	5	5	5	5	5	4	4	4	4	5	4.6	3	3	4	3	3	2	4	4	4	4	3.4	4	5	3	4	4	4	5	4	6	4	4
234	0	14	10	5	2	5	3	2	1	4	4	4	3	4	2	3	2	2	2	1	3	1	4	2	3	3	2.3	4	4	4	5	4	5	4	5	4	4	4.3	2	3	3	3	3	2	2	1	3	1	4
235	1	13	5	3	5	4	4	3	5	4	4	4	3	4	4	3.88889	4	3	5	4	5	4	4	4	4	5	4.2	5	5	5	5	3	4	4	5	4	3	4.3	2	1	3	4	4	3	3	2	2	4	3
236	1	11	5	4	4	2	4	4	3	3	3	4	4	4	3	3.55556	5	5	5	5	4	5	5	5	4	5	4.8	3	3	2	3	3	3	3	4	1	3	2.8	4	4	4	4	4	3	4	4	4	3	4
237	0	10	4	5	4	4	3	1	1	4	4	3	4	3	3	2.88889	4	1	4	3	4	4	4	4	4	4	3.6	4	4	5	4	4	5	4	3	4	5	4.2	5	5	5	5	4	6	6	6	6	4	5
238	1	10	6	1	3	1	4	1	3	2	3	2	4	4	5	3.11111	2	3	3	3	3	4	4	3	4	3	3.2	4	4	4	5	4	4	4	4	4	4	4.1	3	4	3	4	3	4	5	3	3	4	2
239	0	14	4	4	5	5	4	3	4	3	4	4	5	4	3	3.77778	5	4	5	4	5	4	5	5	5	5	4.7	3	4	2	2	4	4	3	3	3	3	3.1	3	4	3	4	3	4	4	2	4	3	3
240	1	10	8	2	3	3	3	4	5	4	5	3	4	5	4	4.11111	2	1	2	1	3	1	3	2	3	1	1.9	1	3	3	4	3	1	3	3	2	3	2.6	3	2	3	3	3	1	5	2	1	2	1
241	0	12	6	2	3	5	4	4	2	4	2	3	3	5	3	3.33333	4	5	5	4	4	4	4	4	4	4	4.2	3	3	3	4	3	4	5	3	4	4	3.6	5	3	3	4	3	3	5	3	4	2	4
242	1	11	4	4	1	1	4	3	4	4	4	5	4	4	4	4	3	2	4	3	3	4	2	3	4	1	2.9	3	3	2	3	3	3	3	4	3	3	3	4	6	4	6	3	5	5	5	5	4	4
243	1	13	8	1	1	2	5	5	5	5	5	4	5	4	5	4.77778	1	1	1	2	3	1	2	3	1	1	1.6	4	4	4	4	4	4	4	4	3	4	3.9	3	6	4	5	3	4	3	4	3	5	5
244	0	11	5	4	5	3	3	3	3	1	2	3	3	3	2	2.55556	4	4	3	5	4	4	4	4	4	4	4	4	5	4	5	5	5	4	5	5	5	4.7	5	6	4	5	4	4	6	6	3	5	5
245	0	12	1	1	3	1	5	5	5	4	5	4	4	5	4	4.55556	4	3	2	3	3	3	3	3	1	4	2.9	3	1	3	3	2	1	3	1	3	1	2.1	2	3	2	3	3	2	1	2	1	3	4
246	1	14	3	2	2	1	4	3	4	3	4	3	3	3	4	3.44444	5	5	5	5	5	4	5	5	4	4	4.7	4	4	3	3	4	3	4	4	4	3	3.6	4	4	4	3	4	3	5	4	3	4	3
247	0	10	1	3	1	1	4	5	4	4	4	5	4	4	3	4.11111	2	2	1	2	3	1	3	3	3	3	2.3	3	3	1	3	3	2	4	3	2	1	2.5	6	5	5	6	4	6	4	6	4	6	5
248	0	14	3	4	3	2	3	2	3	3	3	4	4	3	4	3.22222	5	5	5	4	5	5	5	5	5	5	4.9	4	3	3	4	4	5	3	3	4	4	3.7	3	3	1	1	3	3	3	4	3	2	3
249	0	13	2	1	3	1	5	5	5	4	5	4	4	5	5	4.66667	2	1	2	1	2	1	2	2	4	1	1.8	3	3	4	3	1	2	4	3	1	3	2.7	3	3	1	3	3	2	3	4	1	3	2
250	0	14	2	2	1	1	4	2	4	4	3	2	3	1	3	2.88889	2	3	3	1	3	3	3	3	3	3	2.7	3	3	3	2	3	1	3	1	4	2	2.5	2	3	2	3	4	4	3	5	3	2	1
251	1	10	5	2	3	1	3	3	2	1	3	2	3	5	2	2.66667	3	4	5	1	3	2	3	3	1	3	2.8	3	2	3	4	4	1	3	4	3	2	2.9	3	3	4	5	4	4	5	4	4	2	4
252	0	14	5	4	3	5	4	5	5	3	4	5	5	4	5	4.44444	2	3	4	1	3	3	3	3	3	3	2.8	4	4	3	3	3	3	4	4	3	3	3.4	5	6	5	6	5	6	4	6	4	6	4
253	0	13	4	1	2	2	2	4	3	1	2	1	2	4	2	2.33333	5	5	5	5	5	5	5	5	5	5	5	4	4	3	3	5	5	4	3	4	5	4	4	3	6	6	4	5	4	5	6	3	3
254	1	10	4	1	2	2	3	2	2	4	4	4	3	4	4	3.33333	4	4	4	4	3	3	4	3	5	4	3.8	3	3	1	4	3	1	3	4	3	3	2.8	3	2	1	2	2	2	1	4	3	3	3
255	0	12	2	4	2	1	4	3	3	5	4	4	3	3	2	3.44444	2	1	2	3	3	1	3	3	3	2	2.3	3	3	3	5	4	4	4	4	3	3	3.6	3	3	2	2	2	1	3	3	3	3	2
256	0	10	1	5	4	4	3	3	3	2	2	1	1	2	2	2.11111	3	3	2	2	3	2	3	3	3	3	2.7	5	5	3	5	5	5	5	4	5	5	4.7	3	3	2	3	6	4	3	4	4	1	3
257	0	14	7	2	1	3	5	4	4	4	4	3	4	5	4	4.11111	2	1	2	3	3	3	4	3	4	3	2.8	4	3	4	4	3	4	4	4	3	3	3.6	4	6	4	6	3	6	5	6	5	4	4
258	0	13	8	3	2	3	3	2	3	3	2	4	3	4	2	2.88889	3	3	3	3	3	4	3	3	3	2	3	4	4	4	3	3	3	5	4	4	4	3.8	1	4	4	4	3	2	3	4	1	3	4
259	0	12	9	4	3	3	4	4	3	5	4	3	3	1	1	3.11111	2	3	3	3	2	2	2	3	3	4	2.7	3	3	4	3	4	4	3	3	4	3	3.4	4	3	4	2	3	4	2	3	3	4	3
260	0	12	1	1	1	1	5	5	5	5	4	3	5	4	5	4.55556	3	1	4	3	3	2	2	3	3	2	2.6	3	2	3	3	2	1	2	3	3	1	2.3	3	1	4	3	2	2	2	2	2	3	4
261	0	14	2	1	1	2	5	3	4	4	4	5	4	5	4	4.22222	2	2	2	1	3	2	1	3	3	2	2.1	4	5	3	4	3	5	5	4	4	4	4.1	4	1	4	3	5	5	3	2	4	3	4
262	1	11	3	4	1	3	3	4	3	4	3	4	3	3	3	3.33333	5	5	5	4	5	5	5	5	5	5	4.9	5	4	3	5	4	5	4	4	4	4	4.2	5	3	4	6	5	4	3	3	4	4	4
263	0	11	3	2	1	2	5	5	5	5	5	5	3	4	4	4.55556	3	5	5	4	3	4	4	4	5	5	4.2	3	3	3	3	3	4	3	2	1	3	2.8	1	5	3	3	2	1	2	1	2	2	2
264	1	14	1	1	3	2	2	1	1	2	3	2	2	4	3	2.22222	2	1	2	3	3	3	3	3	3	2	2.5	4	4	3	4	3	5	4	5	4	3	3.9	3	2	3	4	4	3	4	3	3	4	4
265	1	10	7	2	3	3	3	5	4	5	4	5	3	3	4	4	4	5	4	4	4	4	4	4	4	5	4.2	5	4	4	4	5	5	4	5	4	4	4.4	3	3	3	5	4	1	4	2	5	3	3
266	1	11	1	1	2	1	1	2	1	4	3	3	3	2	2	2.33333	5	5	5	5	4	4	5	5	4	4	4.6	3	3	3	3	1	3	2	3	3	3	2.7	3	4	5	3	5	2	5	2	3	4	4
267	0	12	6	2	2	3	3	4	4	5	3	3	4	4	3	3.66667	3	3	2	1	3	1	3	3	3	1	2.3	3	1	3	4	4	3	3	3	1	3	2.8	2	4	4	2	5	2	3	3	4	3	2
268	1	11	2	2	1	2	4	4	4	3	2	4	5	4	4	3.77778	3	1	2	1	2	2	3	3	1	3	2.1	4	5	3	5	4	5	4	4	4	4	4.2	3	2	3	3	3	3	2	4	2	3	4
269	0	14	4	2	2	3	3	4	3	4	4	4	3	4	4	3.66667	5	5	5	5	4	5	5	5	4	5	4.8	3	3	3	3	3	1	3	2	2	1	2.4	3	4	3	6	3	4	4	4	4	4	4
270	1	11	2	5	1	3	4	3	4	2	4	4	4	5	3	3.66667	4	4	4	4	3	4	4	4	5	5	4.1	2	3	1	4	3	4	3	2	1	3	2.6	2	2	1	2	3	1	1	2	2	1	4
271	1	10	3	3	1	1	3	4	2	5	4	4	3	3	4	3.55556	5	4	5	4	4	4	4	4	5	5	4.4	3	4	3	4	2	4	3	4	3	4	3.4	2	2	3	2	2	1	3	4	2	2	3
272	1	13	2	1	1	1	3	2	3	1	4	3	3	2	3	2.66667	3	3	5	5	3	4	4	3	4	4	3.8	4	5	3	5	5	4	4	5	4	3	4.2	4	5	5	5	4	3	5	4	5	4	3
273	1	14	4	1	2	1	5	5	4	5	5	4	4	5	5	4.66667	2	4	3	3	3	3	4	3	3	4	3.2	3	1	3	3	3	5	3	3	3	3	3	1	1	4	1	3	2	3	2	3	1	4
274	1	10	1	2	4	3	4	4	2	2	3	4	3	4	4	3.33333	5	5	4	4	4	4	5	3	4	5	4.3	3	1	3	4	3	2	1	3	3	2	2.5	3	2	2	4	4	4	3	4	3	3	4
275	1	13	8	5	4	5	1	3	2	3	3	1	2	3	2	2.22222	5	5	5	5	5	5	5	5	5	5	5	4	5	5	5	5	5	4	3	5	5	4.6	4	4	4	5	3	1	3	3	3	3	3
276	0	14	3	1	3	2	5	5	5	5	5	5	5	5	5	5	3	3	2	3	3	3	4	3	3	2	2.9	3	4	3	3	3	4	3	2	3	2	3	3	3	4	5	4	4	4	5	3	1	4
277	0	13	1	3	3	2	3	5	3	5	4	4	4	4	4	4	3	1	3	3	3	4	3	3	1	3	2.7	3	3	3	3	1	3	3	1	3	3	2.6	3	3	3	3	2	4	1	4	3	3	3
278	0	10	6	5	4	5	2	2	1	3	3	1	2	3	1	2	4	2	2	3	4	4	3	3	3	4	3.2	4	5	5	5	5	5	4	5	5	5	4.8	4	3	3	3	3	5	2	2	3	3	6
279	1	11	6	4	5	3	5	5	4	5	5	2	4	5	5	4.44444	4	4	2	4	3	4	4	4	3	4	3.6	4	3	5	5	4	5	4	4	4	5	4.3	4	4	4	5	3	6	3	2	3	2	3
280	0	12	3	1	1	1	5	3	5	4	4	5	4	4	4	4.22222	5	5	5	4	5	4	5	5	5	4	4.7	4	3	5	5	4	5	4	5	3	5	4.3	5	3	3	5	5	4	6	4	6	4	6
281	0	12	2	1	2	1	2	2	1	2	3	2	2	1	2	1.88889	5	5	5	4	5	3	5	5	5	4	4.6	4	3	4	4	3	4	3	3	4	4	3.6	5	6	3	4	5	5	5	6	4	4	4
282	0	13	10	4	3	2	4	4	4	2	4	4	4	5	4	3.88889	5	4	5	5	5	4	5	4	4	5	4.6	4	4	5	4	5	5	4	4	3	5	4.3	3	2	3	3	3	4	4	4	3	3	4
283	0	14	7	5	4	3	2	5	4	4	3	3	3	2	3	3.22222	2	1	2	3	2	1	1	3	1	3	1.9	1	3	3	4	3	3	3	3	3	3	2.9	3	4	4	4	3	4	5	5	4	4	5
284	0	11	9	4	3	4	5	5	4	4	5	5	4	5	5	4.66667	1	2	2	1	2	2	1	2	3	2	1.8	1	4	2	2	4	1	4	4	1	1	2.4	2	2	1	4	3	3	2	2	2	1	2
285	1	13	2	1	1	1	2	3	3	3	1	2	2	3	2	2.33333	5	5	3	4	4	4	5	4	5	5	4.4	3	3	3	4	3	3	1	3	3	3	2.9	5	4	4	5	5	4	3	4	6	6	5
286	0	14	6	3	2	3	5	5	5	4	5	5	5	5	5	4.88889	2	2	1	3	3	2	3	3	3	3	2.5	3	3	3	1	3	2	3	3	2	1	2.4	3	3	2	3	4	3	4	3	1	2	3
287	0	12	5	2	1	3	3	3	2	2	3	4	5	2	5	3.22222	4	3	2	3	3	4	4	4	4	3	3.4	4	4	4	4	3	4	4	3	3	4	3.7	3	2	2	5	3	5	3	4	3	3	4
288	0	12	4	1	2	1	2	2	3	4	4	3	4	4	3	3.22222	4	5	5	4	3	4	4	4	4	4	4.1	3	3	3	3	3	3	5	4	3	3	3.3	3	4	4	1	2	4	5	4	1	3	3
289	1	12	1	1	1	1	4	5	5	5	3	5	4	4	4	4.33333	2	2	2	3	4	3	3	4	3	1	2.7	2	3	1	3	1	1	4	2	3	2	2.2	2	2	1	2	1	4	2	1	3	2	2
290	0	14	6	1	2	1	5	5	4	5	5	5	5	4	5	4.77778	3	4	2	3	3	3	1	3	2	3	2.7	1	3	1	3	3	3	3	2	1	3	2.3	1	3	3	1	1	2	2	2	3	1	3
291	0	13	7	3	4	5	5	2	2	5	5	5	3	5	4	4	3	4	4	3	3	3	4	3	1	4	3.2	3	3	3	3	3	2	3	3	3	2	2.8	3	3	3	5	4	3	2	4	3	2	2
292	1	12	3	2	2	4	4	3	4	3	4	4	3	3	5	3.66667	5	4	5	5	5	4	5	5	4	5	4.7	5	4	4	4	5	3	4	5	4	3	4.1	3	2	2	2	3	3	3	3	4	2	2
293	0	12	8	5	4	4	3	5	4	5	3	4	4	5	4	4.11111	2	1	1	1	2	3	1	2	3	2	1.8	4	5	5	5	4	4	5	5	4	5	4.6	3	3	2	6	3	3	4	3	3	3	4
294	0	14	6	4	3	4	2	2	1	2	2	2	2	4	2	2.11111	5	5	4	4	4	5	5	5	5	4	4.6	4	4	5	4	4	5	5	4	4	5	4.4	3	3	2	3	5	2	3	1	3	4	3
295	0	14	8	5	4	5	5	5	4	5	5	5	5	5	5	4.88889	5	4	4	3	5	4	4	4	4	4	4.1	4	4	4	4	5	5	4	4	4	5	4.3	3	3	3	4	3	3	4	4	3	4	3
296	1	13	6	4	5	5	3	2	1	4	3	2	3	4	4	2.88889	5	5	5	4	4	5	5	4	5	5	4.7	4	5	5	4	4	5	4	5	5	4	4.5	5	5	4	4	4	3	5	4	5	5	4
297	1	13	1	4	3	2	5	3	4	3	4	4	3	4	3	3.66667	4	4	3	3	4	4	4	3	5	3	3.7	3	3	3	3	4	3	2	3	2	2	2.8	5	3	4	4	5	4	4	4	4	4	4
298	1	13	3	3	2	1	4	5	5	5	5	5	5	4	5	4.77778	4	5	2	4	4	4	4	4	4	5	4	1	1	3	3	4	1	3	3	3	2	2.4	3	2	2	3	6	4	3	4	3	2	4
299	0	14	1	4	5	2	1	1	1	2	2	2	2	3	1	1.66667	4	1	2	4	3	4	5	3	3	3	3.2	4	3	3	5	4	4	4	4	3	4	3.8	4	3	3	6	4	4	5	3	5	2	2
300	0	10	3	3	3	2	4	2	3	4	3	2	3	3	3	3	1	1	1	2	1	2	3	2	2	3	1.8	3	1	3	3	3	4	3	4	4	3	3.1	1	2	3	2	2	2	1	2	1	2	2
301	1	12	1	2	1	1	4	4	4	5	5	5	5	5	5	4.66667	4	5	4	5	3	4	4	5	5	4	4.3	3	3	4	3	4	4	2	3	3	3	3.2	4	4	4	5	4	4	4	3	4	3	2
302	1	11	1	3	3	3	2	1	4	2	2	2	3	2	2	2.22222	2	1	4	2	1	1	3	2	3	1	2	4	5	5	5	5	5	5	5	5	3	4.7	2	1	1	1	3	1	1	2	1	2	3
303	1	12	9	5	4	5	2	3	4	4	3	1	4	2	3	2.88889	2	2	2	2	1	1	3	2	1	3	1.9	4	3	4	5	3	4	3	3	4	3	3.6	4	3	2	3	5	4	2	4	3	4	4
304	0	12	4	2	1	2	4	3	3	2	4	1	4	4	5	3.33333	5	4	5	5	4	5	4	4	4	5	4.5	4	5	4	4	4	4	3	4	5	4	4.1	2	3	1	1	2	2	2	3	2	1	3
305	1	12	6	1	1	1	1	2	2	3	3	2	4	2	2	2.33333	5	5	5	5	4	5	5	5	4	5	4.8	4	4	3	5	5	5	4	5	4	5	4.4	4	3	4	6	5	6	5	4	4	4	4
306	0	12	5	1	3	2	2	4	2	3	2	1	3	4	3	2.66667	4	4	3	4	3	4	5	3	5	4	3.9	3	4	3	2	3	4	3	3	3	2	3	4	4	4	5	3	4	4	4	4	4	5
307	1	12	4	1	1	1	4	5	5	5	4	5	5	5	5	4.77778	2	2	2	3	4	2	3	3	3	3	2.7	2	3	3	1	2	3	3	1	3	2	2.3	2	2	2	2	4	2	2	3	3	3	4
308	1	10	9	1	5	4	1	2	2	3	1	2	3	3	2	2.11111	4	4	4	4	3	3	3	3	4	4	3.6	5	5	5	5	5	5	5	5	5	5	5	4	3	5	3	3	4	4	6	4	4	5
309	1	14	4	1	2	3	2	3	3	4	3	3	3	4	2	3	3	1	1	3	2	3	2	4	1	2	2.2	3	4	4	4	3	1	4	3	2	4	3.2	3	3	3	2	4	3	3	4	3	2	2
310	1	12	6	4	2	4	5	5	5	5	5	4	5	5	5	4.88889	3	4	3	4	4	4	4	4	4	5	3.9	3	1	3	4	2	2	3	3	2	1	2.4	3	3	5	3	3	5	3	4	5	2	2
311	0	10	10	3	3	5	4	3	5	4	4	4	4	4	4	4	2	3	1	2	2	2	3	2	3	2	2.2	3	4	4	5	4	4	4	4	3	3	3.8	5	4	4	4	6	4	5	3	4	3	5
312	1	13	2	1	2	2	4	5	5	4	5	5	5	5	5	4.77778	3	4	2	3	3	3	3	4	4	3	3.2	3	3	3	1	3	3	3	3	3	1	2.6	1	1	1	2	1	1	1	2	1	3	3
313	0	12	1	3	5	4	3	3	4	1	3	1	3	1	2	2.33333	3	2	2	3	3	3	4	3	3	4	3	4	4	4	5	4	5	5	4	5	4	4.4	5	4	4	4	6	5	2	4	4	6	4
314	1	10	1	1	4	1	3	4	4	4	4	3	4	4	4	3.77778	4	4	4	4	4	4	4	4	4	4	4	3	3	3	3	3	4	3	3	3	3	3.1	5	5	4	5	6	4	6	6	6	5	4
315	0	11	8	2	5	5	5	5	5	5	4	5	5	5	5	4.88889	4	4	4	4	3	4	4	4	4	5	4	3	3	3	3	3	3	3	4	3	3	3.1	4	3	4	6	4	4	5	4	3	3	4
316	1	11	8	5	4	4	3	4	4	3	4	2	3	3	2	3.11111	3	1	1	3	3	3	2	4	1	3	2.4	5	4	4	4	4	5	5	4	4	4	4.3	4	4	4	4	4	6	4	4	3	6	5
317	1	10	5	5	2	2	5	4	4	5	5	4	5	5	5	4.66667	4	4	2	2	3	3	3	3	3	4	3.1	3	4	3	4	3	3	4	4	4	3	3.5	3	3	3	4	3	3	3	3	4	4	4
318	1	13	4	4	4	3	4	4	2	2	3	4	5	5	3	3.55556	2	2	2	2	3	2	3	2	1	4	2.3	4	4	3	3	4	4	4	5	4	4	3.9	1	3	3	3	2	2	3	3	2	3	4
319	0	12	9	5	2	5	5	5	4	5	5	5	5	4	5	4.77778	4	4	2	4	3	4	4	3	3	5	3.6	3	3	3	4	4	4	4	4	3	3	3.5	3	2	1	3	3	3	2	2	3	2	3
320	0	13	4	3	1	1	2	2	2	3	3	3	5	1	3	2.66667	4	4	5	5	4	3	3	4	4	5	4.1	3	3	3	4	4	3	3	4	4	3	3.4	3	3	4	3	4	3	3	4	4	4	3
321	1	10	1	3	2	1	3	2	4	2	2	4	3	2	2	2.66667	5	5	5	3	5	4	5	5	3	4	4.4	4	3	4	3	3	3	3	4	3	3	3.3	4	5	4	5	5	5	5	5	5	4	5
322	0	10	8	2	5	4	3	2	3	2	4	3	3	4	3	3	4	4	4	4	3	4	4	5	4	4	4	5	5	5	5	5	4	5	5	5	5	4.9	3	3	3	3	3	4	4	4	3	1	4
323	0	14	6	3	3	3	3	3	4	4	4	5	3	4	4	3.77778	5	5	5	4	4	5	5	5	5	5	4.8	5	4	4	5	4	5	4	5	5	5	4.6	4	4	4	4	5	5	5	3	2	4	3
324	1	10	6	2	3	5	4	5	5	5	5	5	5	3	4	4.55556	4	5	3	4	3	3	5	3	4	4	3.8	4	5	5	5	5	5	5	3	4	4	4.5	4	3	4	5	3	3	4	4	4	3	4
325	1	12	7	4	4	2	5	5	4	5	5	5	4	4	5	4.66667	2	2	2	2	2	2	1	3	2	4	2.2	2	3	3	3	2	1	3	2	2	1	2.2	1	1	3	1	3	2	3	3	2	3	3
326	1	11	6	1	2	4	3	4	4	2	3	1	3	3	3	2.88889	3	3	3	2	3	3	4	3	3	3	3	4	4	5	5	4	4	4	4	5	4	4.3	6	6	5	5	6	4	4	4	3	5	5
327	0	10	2	1	2	1	1	4	3	4	2	1	3	3	5	2.88889	5	4	5	5	5	5	5	4	5	5	4.8	4	4	5	5	4	5	5	4	4	5	4.5	5	6	3	4	5	4	4	4	4	5	3
328	0	12	7	2	3	2	5	4	5	5	5	5	5	5	5	4.88889	2	5	4	3	4	3	4	3	3	3	3.4	3	3	4	4	4	3	3	4	4	3	3.5	5	5	3	5	5	4	5	4	6	5	5
329	0	14	4	2	4	2	3	2	3	1	2	4	3	2	2	2.44444	5	4	5	4	5	4	4	5	4	4	4.4	3	3	4	3	3	3	4	4	3	3	3.3	5	4	4	4	5	6	5	4	5	4	4
330	1	12	1	2	2	1	4	4	5	5	4	4	4	4	4	4.22222	5	5	4	4	5	5	5	4	5	5	4.7	4	5	3	4	3	4	5	4	4	4	4	5	6	4	4	4	4	5	4	5	4	5
331	0	12	5	1	2	3	5	5	5	3	4	4	3	3	4	4	4	2	2	3	3	3	3	3	3	3	2.9	4	3	4	5	4	4	3	4	4	5	4	4	4	5	5	6	4	4	4	6	4	4
332	0	11	7	2	2	1	2	2	2	3	3	3	1	2	2	2.22222	4	4	3	4	3	3	3	4	3	4	3.5	5	4	5	4	5	5	5	5	5	5	4.8	3	3	2	2	2	3	4	4	3	3	3
333	1	11	4	4	1	4	4	3	4	2	4	1	3	3	3	3	1	2	2	3	1	3	4	2	1	1	2	4	5	4	4	4	4	4	4	4	4	4.1	3	3	4	5	4	4	2	3	3	2	4
334	1	10	1	2	1	1	4	4	4	2	4	4	5	4	4	3.88889	5	4	5	4	4	5	5	4	4	4	4.4	4	4	5	4	5	5	5	4	4	4	4.4	4	4	6	5	4	5	6	6	5	4	5
335	1	11	1	2	4	4	4	5	5	5	4	5	5	4	4	4.55556	5	4	5	5	4	4	5	5	4	5	4.6	4	4	5	5	4	5	5	5	5	5	4.7	5	4	6	5	6	6	5	5	4	4	4
336	0	13	6	3	4	4	2	2	1	1	3	2	2	2	2	1.88889	5	4	5	5	5	5	5	5	5	5	4.9	5	4	5	5	5	5	5	5	5	5	4.9	6	6	3	3	4	3	4	5	3	5	5
337	1	12	1	1	3	4	5	5	5	5	4	5	5	5	5	4.88889	4	5	4	4	5	5	4	5	4	4	4.4	4	4	3	3	3	4	3	4	4	3	3.5	5	6	4	5	5	6	5	4	6	6	6
338	0	14	9	3	3	5	2	1	1	3	4	2	3	2	3	2.33333	5	4	5	5	5	4	3	4	4	4	4.3	5	4	4	4	4	5	5	5	5	5	4.6	5	6	5	5	5	5	4	6	4	5	5
339	1	14	1	1	4	4	5	5	5	4	5	4	5	5	5	4.77778	5	5	5	4	4	5	5	4	4	5	4.6	4	4	4	4	4	5	5	4	5	4	4.3	5	5	4	6	6	4	6	6	5	6	5
340	1	12	10	4	3	5	4	3	4	5	3	3	5	2	3	3.55556	3	3	4	2	2	3	4	3	4	2	3	5	4	5	5	5	5	5	5	5	4	4.8	5	6	6	5	6	5	5	4	5	6	5
341	1	10	1	4	2	1	4	3	4	1	4	4	3	4	3	3.33333	3	2	3	1	3	4	4	3	3	3	2.9	3	3	4	3	3	4	4	4	4	4	3.6	6	5	6	6	6	5	6	6	6	5	5
342	1	10	3	3	1	3	5	5	4	4	5	5	5	5	4	4.66667	5	5	4	4	4	5	4	4	4	5	4.4	5	4	5	4	5	5	4	5	4	5	4.6	6	6	4	6	6	6	6	6	5	5	4
343	1	12	2	2	1	4	4	5	5	4	5	4	5	4	5	4.55556	2	2	3	3	3	1	1	3	3	3	2.4	3	4	3	4	3	4	3	5	3	4	3.6	6	5	5	6	5	4	6	6	4	4	4
344	1	10	1	1	3	3	3	3	4	3	5	4	4	2	3	3.44444	5	4	4	4	3	4	4	4	4	4	4	3	3	1	4	2	3	4	3	3	3	2.9	5	3	4	5	6	5	5	5	5	5	5
345	0	13	6	4	4	2	5	4	5	5	4	5	4	5	4	4.55556	4	5	4	3	5	5	4	5	5	4	4.4	3	3	3	4	5	4	4	4	4	3	3.7	4	3	4	3	3	3	4	5	4	5	5
346	0	12	8	5	2	5	5	5	4	4	5	4	5	4	4	4.44444	3	4	2	3	2	2	1	3	3	4	2.7	3	3	4	5	3	3	3	2	4	3	3.3	3	3	3	4	3	2	3	4	3	5	3
347	1	10	4	1	1	1	1	3	3	2	3	1	2	3	1	2.11111	3	4	4	4	3	3	4	3	1	3	3.2	3	4	3	4	3	4	3	4	4	2	3.4	4	4	4	5	4	4	2	4	1	3	5
348	1	11	8	2	4	3	4	3	4	4	4	3	3	2	2	3.22222	5	4	5	5	4	5	5	4	5	5	4.7	4	5	5	5	5	5	5	5	5	5	4.9	4	5	4	5	4	4	6	5	6	4	4
349	1	11	7	4	4	4	5	5	4	5	5	5	5	5	5	4.88889	4	2	3	2	3	3	4	3	3	3	3	4	2	3	3	3	4	3	3	3	3	3.1	3	3	3	5	4	3	2	3	3	3	4
350	0	12	6	4	2	4	5	5	4	4	5	5	4	4	4	4.44444	4	4	4	3	3	3	4	4	4	2	3.5	3	3	3	4	3	5	3	2	3	4	3.3	5	3	3	5	6	4	6	5	4	4	5
351	1	13	3	3	3	1	3	3	3	4	4	5	5	4	3	3.77778	2	3	1	1	2	3	3	2	3	3	2.3	4	4	4	4	4	4	4	5	5	5	4.3	5	4	5	6	6	4	5	6	6	6	5
352	1	10	5	3	5	3	5	3	4	5	4	5	5	5	5	4.55556	4	5	5	4	5	5	4	4	4	5	4.5	4	4	4	4	5	4	4	3	3	4	3.9	5	3	4	4	4	4	5	4	5	4	4
353	1	14	9	3	5	3	2	1	2	3	4	2	4	2	2	2.44444	3	5	5	3	3	3	4	4	4	3	3.7	4	5	5	5	5	5	5	5	5	4	4.8	4	3	4	3	3	2	5	3	3	4	4
354	1	11	9	1	2	3	3	2	3	2	2	2	4	3	2	2.55556	5	5	5	4	4	3	5	4	3	4	4.2	4	4	3	5	5	4	4	4	5	3	4.1	4	4	3	4	4	3	4	3	3	3	1
355	1	13	2	3	4	5	4	4	5	5	4	5	4	4	4	4.33333	5	5	4	4	4	4	5	4	4	5	4.4	3	4	3	5	4	3	3	4	5	3	3.7	3	2	3	4	3	3	2	3	3	3	4
356	1	10	1	1	1	1	4	3	3	3	4	3	3	3	2	3.11111	1	3	1	2	3	2	2	2	3	3	2.2	4	4	4	4	4	5	4	4	4	4	4.1	4	3	6	2	4	6	5	4	4	3	4
357	1	14	7	5	5	3	4	4	4	5	5	5	5	5	5	4.66667	4	3	3	5	4	5	5	4	3	4	4	4	5	5	4	4	5	5	4	5	5	4.6	6	4	3	6	5	5	5	5	5	4	5
358	0	11	3	1	1	1	2	2	4	4	4	3	4	3	4	3.33333	2	3	2	1	4	2	2	3	3	3	2.5	4	5	3	4	4	4	4	4	3	2	3.7	3	3	3	1	3	2	3	3	1	2	4
359	1	10	4	2	4	3	2	4	5	4	3	5	4	4	3	3.77778	5	4	5	4	4	4	5	4	4	5	4.4	4	4	3	4	3	5	5	4	4	3	3.9	6	4	6	6	4	4	5	5	5	4	5
360	0	10	5	3	4	3	2	4	4	5	3	1	4	2	3	3.11111	2	1	1	2	3	3	3	3	3	3	2.4	3	3	3	3	4	3	3	3	3	3	3.1	4	5	4	3	4	3	3	5	2	3	4
361	1	11	8	5	5	5	4	2	2	2	4	3	4	3	2	2.88889	5	4	4	3	5	4	5	5	4	5	4.4	4	4	3	4	4	4	3	4	3	3	3.6	5	3	6	5	6	5	6	5	5	3	3
362	1	10	9	2	1	3	3	2	3	1	3	4	1	2	1	2.22222	4	4	5	2	4	3	4	4	4	4	3.8	4	4	5	4	3	3	4	4	4	3	3.8	4	3	4	3	5	4	6	5	3	3	5
363	0	13	8	5	2	5	2	3	1	5	3	3	2	4	4	3	2	1	2	2	1	3	2	3	4	3	2.3	5	5	5	5	5	5	4	4	5	5	4.8	6	6	5	2	6	5	4	5	4	4	4
364	1	12	6	3	4	5	5	5	5	4	5	5	4	5	5	4.77778	5	4	4	5	5	4	5	4	2	3	4.1	3	3	4	3	3	4	4	3	4	3	3.4	6	4	6	6	6	6	5	4	6	4	4
365	1	10	3	3	5	1	4	5	4	4	5	5	5	4	5	4.55556	4	4	4	3	3	4	5	4	3	3	3.7	3	4	3	5	3	4	4	3	4	3	3.6	3	3	5	6	3	4	6	4	3	3	4
366	1	13	2	2	3	3	4	4	5	5	5	5	5	4	5	4.66667	4	4	4	4	4	4	4	3	4	5	4	4	4	3	4	5	4	5	5	5	4	4.3	5	5	5	3	3	6	3	5	3	5	6
367	1	14	10	2	4	4	1	2	2	2	1	2	3	3	2	2	4	4	4	3	4	4	5	4	4	3	3.9	3	3	4	1	5	4	4	4	4	4	3.6	6	5	4	5	5	6	5	4	5	4	5
368	1	11	1	2	2	1	4	3	4	3	4	5	2	4	5	3.77778	5	4	5	3	5	4	5	4	5	4	4.4	3	1	3	3	2	1	3	2	3	3	2.4	3	3	4	4	4	3	4	2	3	2	3
369	0	11	10	5	4	5	5	5	5	5	4	4	4	5	5	4.66667	4	4	3	5	3	4	3	4	4	4	3.8	5	4	5	5	5	5	5	5	5	5	4.9	5	5	4	5	5	4	5	5	5	5	4
370	0	10	6	5	3	2	5	5	5	5	5	5	4	5	5	4.88889	4	3	3	4	3	4	4	3	3	4	3.5	3	3	3	4	4	3	3	3	3	2	3.1	5	6	6	6	5	5	5	4	3	3	4
371	1	11	10	2	4	4	5	2	5	4	4	4	5	5	4	4.22222	2	2	1	3	1	2	3	2	3	2	2.1	4	4	3	4	4	4	4	4	5	4	4	3	3	2	4	3	4	4	4	4	3	4
372	1	10	5	5	2	2	3	2	2	3	3	4	4	1	1	2.55556	3	5	4	3	3	3	3	4	3	4	3.5	3	3	3	3	5	4	5	4	3	3	3.6	5	5	4	5	5	3	6	5	4	5	5
373	0	11	5	4	3	2	4	4	5	4	2	4	4	5	3	3.88889	2	1	2	3	1	1	3	2	3	2	2	3	3	3	3	3	1	3	3	3	3	2.8	4	4	4	6	6	5	5	5	4	6	5
374	1	12	2	2	3	3	4	5	5	5	4	4	5	4	5	4.55556	4	3	5	3	4	4	4	4	4	4	3.9	3	4	4	3	3	4	3	1	3	3	3.1	5	6	4	5	4	5	5	4	4	6	4
375	1	10	2	2	4	4	2	2	1	2	2	1	2	3	2	1.88889	5	5	5	4	5	4	4	5	4	4	4.5	4	4	4	4	4	5	4	4	5	4	4.2	4	6	4	4	3	4	3	4	4	6	6
376	1	11	1	1	1	1	1	3	3	3	3	5	4	3	3	3.11111	3	4	4	3	5	3	4	4	4	4	3.8	3	3	3	4	2	3	3	4	4	3	3.2	3	3	2	3	3	3	3	3	3	3	2
377	1	13	5	3	3	1	5	5	4	2	4	3	5	4	5	4.11111	3	3	3	3	3	3	4	4	1	1	2.8	4	4	5	4	4	4	4	3	3	4	3.9	6	5	4	5	4	6	3	5	4	4	4
378	1	14	7	3	3	5	3	1	1	3	2	1	2	2	2	1.88889	5	4	5	5	5	5	5	5	5	5	4.9	5	5	5	5	5	5	5	5	5	5	5	3	3	3	3	5	4	4	3	3	3	5
379	0	12	6	5	4	5	4	4	4	3	2	4	3	4	3	3.44444	5	5	5	3	4	4	4	5	4	4	4.3	5	5	5	5	5	5	5	4	5	4	4.8	4	3	4	5	4	4	4	4	3	4	5
380	1	14	3	3	1	1	2	3	1	2	4	3	3	4	3	2.77778	4	4	4	5	4	4	5	4	4	5	4.3	3	3	2	3	1	3	3	3	2	2	2.5	4	4	3	6	5	4	5	5	5	5	5
381	1	11	2	2	4	3	5	4	4	5	5	4	5	4	4	4.44444	5	5	5	4	5	5	4	5	4	5	4.7	5	4	4	5	4	5	5	3	4	3	4.2	5	6	4	5	5	4	4	6	3	5	4
382	0	13	3	1	1	2	1	3	3	4	3	4	3	4	3	3.11111	5	5	5	5	4	5	5	5	5	5	4.9	4	4	4	4	4	4	4	4	4	4	4	3	3	3	5	5	4	2	3	4	2	3
383	0	14	10	1	3	2	1	1	2	2	2	1	1	1	2	1.44444	5	4	5	4	5	4	4	5	4	5	4.5	5	5	5	5	5	5	5	5	5	5	5	4	3	6	4	4	3	5	4	3	3	3
384	1	12	6	5	3	3	3	2	2	4	4	2	5	4	5	3.44444	4	4	4	4	3	4	4	4	3	4	3.8	3	4	3	3	3	5	3	3	1	3	3.1	5	3	4	4	5	4	6	4	4	3	5
385	0	11	5	2	2	2	4	3	4	3	3	1	3	4	2	3	4	5	5	3	3	4	4	3	4	4	3.9	3	2	3	3	2	4	3	3	3	3	2.9	5	4	4	4	6	6	6	6	5	5	4
386	0	14	8	4	2	1	5	4	4	5	4	5	5	4	4	4.44444	2	4	4	3	3	3	3	4	3	4	3.3	1	3	2	3	3	2	3	3	1	3	2.4	3	3	2	2	2	2	3	3	3	3	4
387	0	14	9	3	5	3	4	5	4	4	5	4	3	4	4	4.11111	4	4	4	5	5	4	5	4	4	4	4.3	3	3	3	4	4	4	3	4	4	3	3.5	3	5	3	1	4	3	4	3	2	4	4
388	1	14	4	4	4	3	4	5	4	5	3	4	5	5	4	4.33333	1	1	2	1	2	3	3	2	3	1	1.9	1	3	2	3	2	1	4	3	3	3	2.5	1	2	3	1	1	3	3	2	1	1	1
389	0	11	3	5	2	4	5	5	4	4	5	5	3	5	5	4.55556	3	1	2	1	3	2	1	2	3	3	2.1	3	3	3	3	1	1	2	3	1	1	2.1	1	1	3	3	2	4	1	1	2	3	3
390	1	14	8	1	1	2	1	2	4	2	3	3	5	3	5	3.11111	2	3	1	2	2	3	1	2	1	2	1.9	4	5	4	5	4	5	4	4	4	4	4.3	3	1	3	4	4	2	1	3	2	3	3
391	1	13	9	1	1	2	3	4	4	3	2	1	3	3	3	2.88889	4	3	5	3	4	4	5	4	5	4	4.1	4	2	5	5	4	5	3	3	4	4	3.9	3	4	4	4	4	3	3	3	3	3	5
392	1	10	1	4	2	2	3	2	3	3	3	3	3	3	2	2.77778	4	4	5	3	5	4	5	4	4	3	4.1	4	4	5	5	5	5	4	4	4	5	4.5	3	3	4	1	3	4	3	3	2	3	2
393	1	11	9	1	2	3	5	5	4	5	5	5	5	5	5	4.88889	4	4	4	3	3	4	4	2	3	3	3.4	4	3	5	4	4	5	4	4	4	3	4	4	3	4	2	1	4	3	3	4	3	3
394	1	13	8	1	5	5	4	5	5	5	3	4	4	5	5	4.44444	5	5	5	5	4	4	4	5	5	4	4.6	5	4	5	5	4	5	5	5	5	4	4.7	4	5	4	6	3	4	6	6	3	3	4
395	0	11	10	2	5	3	5	5	5	5	4	5	5	5	5	4.88889	2	1	2	3	2	1	2	3	1	4	2.1	1	3	3	2	3	3	3	3	2	3	2.6	3	2	4	2	2	2	3	4	4	3	2
396	0	11	1	4	5	1	3	4	4	1	3	4	3	3	2	3	5	4	5	5	4	4	4	4	4	5	4.4	5	5	5	3	5	5	5	4	5	5	4.7	4	5	4	3	5	5	5	4	4	4	6
397	1	10	10	4	2	5	1	2	2	2	1	1	2	2	2	1.66667	5	4	5	5	5	5	4	5	4	5	4.7	5	5	5	5	5	5	5	4	4	5	4.8	5	3	6	4	6	2	5	4	5	4	5
398	1	12	5	1	5	1	2	4	3	1	2	3	2	4	2	2.55556	5	4	5	5	4	5	5	4	5	5	4.7	3	4	3	3	3	4	3	3	3	3	3.2	6	4	4	5	6	6	6	4	3	5	5
399	0	11	5	1	3	1	3	5	3	3	4	4	4	5	4	3.88889	5	5	4	1	5	5	4	4	4	5	4.2	3	4	4	3	3	3	4	4	4	3	3.5	3	2	3	3	3	4	5	4	3	4	5
400	0	11	9	5	5	5	5	5	4	5	5	5	5	5	5	4.88889	4	5	4	3	4	4	4	3	4	4	3.9	3	3	3	5	1	3	3	4	3	4	3.2	4	3	4	5	1	1	5	3	3	3	4
401	0	10	3	4	5	4	3	3	4	4	4	3	3	4	4	3.55556	1	4	2	3	2	3	1	4	3	4	2.7	3	3	3	2	3	4	3	3	2	3	2.9	1	3	4	1	1	1	2	1	4	2	1
402	1	12	4	1	4	5	5	3	5	4	4	4	4	5	4	4.22222	5	3	5	4	5	4	4	5	5	3	4.3	3	3	4	5	3	3	5	4	3	3	3.6	4	3	3	5	6	4	5	5	3	3	3
403	0	10	1	3	5	3	3	1	3	3	1	1	3	2	2	2.11111	4	5	2	3	5	4	4	3	3	4	3.7	4	3	3	3	3	2	4	3	3	3	3.1	5	6	5	6	3	6	3	4	4	5	5
404	1	12	2	4	2	1	5	5	5	5	5	4	5	5	5	4.88889	2	3	3	3	3	1	3	4	1	3	2.6	1	3	1	1	2	2	1	3	3	1	1.8	3	2	3	4	4	2	3	1	2	4	2
405	0	12	3	5	4	3	5	4	3	3	4	5	5	4	4	4.11111	5	4	3	5	4	4	5	4	4	4	4.2	3	3	4	4	5	5	4	4	3	4	3.9	2	4	2	2	2	1	2	2	3	3	3
406	0	10	10	2	2	3	3	3	4	2	2	1	2	2	2	2.33333	5	5	5	5	5	5	5	5	4	5	4.9	4	4	4	5	4	4	4	4	3	4	4	3	4	3	4	3	4	4	4	4	4	4
407	0	11	9	5	5	5	2	2	1	3	3	3	4	3	3	2.66667	2	2	2	2	2	4	3	3	3	4	2.7	4	5	5	4	5	5	5	4	5	5	4.7	4	4	5	5	2	3	3	2	3	4	6
408	1	13	1	4	1	2	3	3	3	3	3	3	4	4	4	3.33333	5	5	5	5	4	5	5	5	5	4	4.8	4	5	4	4	3	3	3	4	4	3	3.7	2	2	2	2	3	3	3	1	1	1	2
409	0	11	10	4	4	4	5	4	5	4	4	5	4	5	4	4.44444	4	4	5	4	4	3	4	4	4	3	3.9	3	3	3	2	3	3	3	3	3	3	2.9	1	3	1	2	2	3	5	3	2	3	1
410	1	11	1	4	4	4	3	3	3	1	3	3	3	3	2	2.66667	5	5	5	5	5	5	5	5	5	5	5	4	4	4	4	4	4	4	5	5	4	4.2	3	3	4	5	6	3	4	2	3	3	2
411	0	12	3	1	2	5	2	4	3	3	3	1	1	2	3	2.44444	3	3	2	3	3	4	3	3	3	3	3	4	4	3	3	4	5	3	4	4	4	3.8	3	4	2	2	3	3	2	1	3	3	3
412	1	12	9	3	4	5	5	4	5	4	5	5	5	5	5	4.77778	2	3	2	1	3	3	1	3	3	4	2.5	4	4	3	4	4	3	4	4	2	3	3.5	4	4	3	2	4	1	4	3	3	3	3
413	1	14	7	5	4	3	3	1	1	1	3	2	3	2	2	2	5	5	5	5	4	5	4	4	5	4	4.6	5	5	5	5	5	5	5	5	4	5	4.9	6	3	4	4	6	5	6	5	6	5	4
414	0	14	8	1	3	2	5	5	4	5	4	5	5	5	4	4.66667	4	5	5	5	3	5	4	4	4	4	4.3	4	5	4	3	4	5	5	4	4	4	4.2	3	4	3	1	3	2	4	2	4	4	4
415	0	10	5	4	3	4	3	2	2	1	1	4	2	2	3	2.22222	3	3	4	1	3	4	4	3	4	3	3.2	3	3	3	4	4	4	4	4	4	3	3.6	4	4	5	4	4	4	5	6	4	3	4
416	0	10	6	3	1	4	5	4	5	4	4	4	5	5	5	4.55556	4	2	3	3	3	4	5	4	4	3	3.5	3	4	1	3	1	1	3	4	3	1	2.4	1	3	2	3	2	2	4	4	3	3	3
417	0	13	7	3	2	2	3	4	3	2	3	2	2	3	2	2.66667	4	5	5	5	4	4	4	4	4	4	4.3	5	4	5	5	5	5	5	5	4	4	4.7	4	4	4	5	5	4	4	4	4	5	5
418	1	13	2	1	5	1	3	3	4	4	4	3	4	4	2	3.44444	4	5	5	4	4	4	4	4	4	5	4.3	3	3	4	3	3	4	3	3	4	3	3.3	5	3	5	4	3	4	4	4	4	5	5
419	1	12	10	2	3	5	4	5	5	3	5	3	4	5	5	4.33333	4	4	5	4	3	5	5	3	4	5	4.2	3	3	3	4	3	2	3	3	1	3	2.8	1	3	4	1	1	3	3	1	2	3	1
420	1	12	8	4	4	5	5	5	5	1	5	5	5	5	5	4.55556	4	3	4	3	4	3	5	4	4	4	3.8	3	3	3	3	2	1	3	4	3	2	2.7	3	2	3	4	2	2	2	2	2	3	3
421	0	13	5	3	1	1	3	4	3	4	2	4	2	2	2	2.88889	5	4	5	4	4	5	5	4	4	4	4.4	3	4	5	4	5	3	4	4	3	3	3.8	3	3	3	1	1	3	3	1	4	4	3
422	1	13	2	2	3	2	3	4	4	3	4	3	5	4	4	3.77778	2	2	3	3	1	3	3	3	3	3	2.6	3	3	3	4	3	3	4	3	3	3	3.2	2	1	1	3	2	1	1	2	2	1	1
423	0	13	5	3	2	2	5	5	4	5	4	5	4	4	5	4.55556	4	4	4	4	3	4	5	5	5	5	4.3	4	3	4	4	3	5	4	3	4	4	3.8	3	2	3	4	3	2	3	3	3	3	3
424	1	14	9	4	5	5	5	5	4	3	4	5	4	5	4	4.33333	2	2	1	2	3	2	3	3	3	1	2.2	4	5	3	3	5	5	5	5	5	3	4.3	4	3	6	6	4	6	6	4	5	4	4
425	0	12	6	5	4	3	3	4	2	3	4	4	3	3	4	3.33333	2	3	3	1	3	3	3	3	3	2	2.6	4	3	3	3	5	4	3	4	3	4	3.6	4	3	3	5	5	4	4	3	5	4	6
426	1	10	6	5	4	5	3	4	4	4	4	4	3	4	4	3.77778	5	3	4	4	4	4	5	4	4	5	4.2	3	1	3	3	3	3	4	3	3	3	2.9	2	2	2	1	1	2	1	1	3	3	4
427	0	14	9	3	5	5	5	4	4	5	4	5	5	5	5	4.66667	5	4	5	4	4	4	4	4	4	4	4.2	3	3	4	5	4	4	4	5	3	4	3.9	3	3	4	3	3	4	4	4	3	5	3
428	1	10	9	4	1	4	4	5	5	4	5	5	4	5	5	4.66667	3	3	4	3	3	3	5	4	3	4	3.5	4	3	4	4	4	3	4	3	5	2	3.6	3	2	3	1	1	1	2	1	5	1	1
429	0	12	5	3	1	1	5	4	4	5	5	5	4	4	4	4.44444	4	2	3	3	3	3	3	4	3	4	3.2	3	3	2	1	2	2	3	2	2	2	2.2	3	4	3	4	3	6	1	3	3	3	2
430	0	10	8	2	4	1	5	4	5	5	5	5	5	5	4	4.77778	4	3	5	3	4	4	2	4	4	3	3.6	3	4	4	3	4	5	4	3	3	3	3.6	3	3	3	3	3	4	3	2	2	3	2
431	1	11	8	4	3	2	2	1	3	3	4	3	3	4	3	2.88889	3	3	4	2	3	4	3	4	3	4	3.3	4	5	5	5	5	5	5	5	4	5	4.8	5	4	4	5	6	4	5	6	4	4	3
432	0	10	3	3	5	5	4	5	5	4	5	5	4	5	4	4.55556	3	3	4	3	4	3	4	4	4	5	3.7	3	3	3	3	3	5	3	3	3	3	3.2	1	2	3	3	2	2	2	3	3	1	2
433	0	10	8	3	2	2	4	4	4	4	5	5	4	4	4	4.22222	5	4	4	4	3	4	5	4	4	4	4.1	3	4	4	5	4	3	3	4	4	5	3.9	5	5	4	4	5	4	6	5	6	6	6
434	0	13	9	5	3	5	5	5	4	3	4	3	5	5	5	4.33333	4	4	4	3	5	4	5	4	4	4	4.1	3	3	3	4	3	1	3	4	3	3	3	2	3	1	3	3	1	1	3	1	2	1
435	0	10	4	5	2	3	5	4	5	4	4	5	4	4	4	4.33333	2	4	1	4	3	1	4	2	4	2	2.7	2	4	3	3	1	4	3	2	2	3	2.7	4	4	4	6	5	3	3	4	6	3	4
436	0	14	6	5	5	5	3	2	4	3	2	3	2	2	2	2.55556	5	5	5	5	5	5	5	5	5	4	4.9	3	4	5	5	5	5	4	5	4	4	4.4	3	3	4	2	3	2	2	2	2	3	2
437	1	11	5	3	2	2	5	5	5	4	4	5	4	4	5	4.55556	4	1	3	3	4	3	3	3	2	2	2.8	3	3	3	3	4	3	3	3	3	3	3.1	2	2	3	3	3	3	2	3	2	2	4
438	1	11	10	5	4	5	1	3	2	4	4	1	4	4	4	3	5	4	5	5	5	5	5	4	5	5	4.8	4	5	3	3	5	4	4	4	5	4	4.1	1	3	1	3	3	1	2	1	2	3	2
439	1	10	8	5	1	2	3	3	3	2	3	4	3	2	2	2.77778	2	2	1	3	1	1	1	2	3	2	1.8	4	4	4	4	4	3	4	4	4	3	3.8	3	3	3	4	3	3	4	3	4	4	3
440	1	14	4	5	2	5	4	4	3	4	3	4	4	4	4	3.77778	3	4	5	3	3	3	4	4	4	4	3.7	2	4	3	3	2	2	1	3	4	3	2.7	5	6	5	5	5	4	5	5	5	4	4
441	1	12	5	4	1	1	5	4	4	5	5	5	5	5	5	4.77778	4	4	2	2	3	3	3	3	3	4	3.1	5	4	3	3	4	5	4	4	5	5	4.2	6	4	6	5	6	5	4	2	3	4	4
442	1	10	10	3	5	3	2	1	4	4	1	2	3	2	2	2.33333	3	4	4	4	4	4	3	4	4	3	3.7	5	4	5	5	5	5	5	5	4	5	4.8	3	2	3	4	4	2	3	4	3	3	3
443	0	11	5	2	1	3	3	1	3	3	3	1	1	4	2	2.33333	5	5	5	5	4	5	5	5	5	5	4.9	4	4	5	5	5	5	4	4	3	3	4.2	5	4	5	4	5	5	4	4	5	5	5
444	1	10	6	4	1	3	3	3	3	2	3	2	3	3	3	2.77778	5	5	5	4	5	5	5	4	4	5	4.7	4	4	4	4	4	5	5	4	5	5	4.4	1	2	1	2	2	1	3	1	1	4	2
445	0	11	5	3	2	5	2	2	3	3	3	4	4	3	3	3	5	5	5	4	4	5	5	4	4	5	4.6	4	3	4	5	5	4	4	5	3	4	4.1	3	3	2	2	1	3	1	4	3	3	3
446	0	11	6	2	3	2	1	3	3	2	2	3	1	3	1	2.11111	5	5	4	4	4	4	5	4	4	3	4.2	3	3	4	4	4	3	3	3	3	3	3.3	4	5	5	3	4	5	6	5	4	2	4
447	1	14	3	4	5	3	5	4	5	5	4	4	3	3	3	4	1	2	2	3	3	3	3	3	2	4	2.6	1	1	3	3	4	3	3	3	3	3	2.7	3	3	2	5	3	4	3	4	4	4	5
448	1	13	10	5	5	5	3	1	3	4	1	3	4	3	2	2.66667	3	4	3	4	3	3	4	3	2	4	3.3	5	5	5	5	5	5	5	4	5	5	4.9	3	1	1	1	2	3	2	2	2	3	2
449	1	13	6	5	3	2	3	3	2	3	3	2	3	2	2	2.55556	5	4	5	5	5	5	5	5	5	5	4.9	5	4	5	5	5	4	4	5	5	4	4.6	3	4	1	3	1	2	3	4	3	4	2
450	0	14	7	5	4	3	2	2	2	3	2	3	3	3	2	2.44444	5	5	5	4	4	5	5	5	4	5	4.7	5	5	5	5	5	5	5	4	5	5	4.9	3	2	3	4	3	3	2	5	3	3	4
451	0	14	7	3	4	5	4	4	4	2	3	3	5	4	4	3.66667	3	3	3	3	3	3	3	3	4	3	3.1	3	4	4	3	3	3	5	4	3	3	3.5	2	2	1	1	3	3	1	2	1	2	4
452	0	13	10	5	1	3	4	1	3	2	5	4	3	5	4	3.44444	5	5	5	4	4	4	4	4	3	5	4.3	4	5	4	4	4	4	5	5	4	4	4.3	3	2	3	2	5	3	4	3	3	2	1
453	1	11	8	1	1	2	2	3	1	3	3	1	1	3	2	2.11111	4	4	5	5	4	5	4	4	5	4	4.4	5	5	5	5	5	5	5	5	5	4	4.9	4	4	4	4	4	4	2	4	4	4	6
454	1	12	2	3	3	4	2	3	4	5	3	5	4	4	4	3.77778	4	4	4	3	3	4	4	3	3	1	3.3	3	3	3	3	3	3	3	3	3	3	3	3	4	5	4	4	4	5	5	4	4	6
455	0	14	9	4	5	3	1	2	2	2	3	2	3	3	2	2.22222	4	3	4	5	4	4	3	3	4	4	3.8	5	4	5	5	5	5	4	4	4	5	4.6	6	3	5	6	5	5	4	5	6	6	4
456	1	12	8	4	5	5	5	2	5	4	4	4	3	5	3	3.88889	2	3	4	3	3	4	3	4	3	4	3.3	3	3	3	3	2	4	4	3	3	1	2.9	2	4	4	2	1	2	3	3	2	1	3
457	0	12	9	1	1	3	5	4	5	5	4	5	5	4	4	4.55556	4	2	3	3	4	4	4	3	4	5	3.6	3	3	2	2	2	3	1	4	3	3	2.6	2	2	1	2	3	2	1	1	2	3	3
458	1	12	8	2	3	2	3	4	4	5	4	3	5	4	5	4.11111	4	5	5	5	4	5	5	5	4	4	4.6	4	5	5	5	4	5	4	4	5	4	4.5	4	3	4	3	3	3	4	2	2	2	1
459	0	10	7	3	2	3	3	2	3	3	3	3	4	4	3	3.11111	1	4	2	3	3	1	3	2	3	4	2.6	3	3	3	4	3	3	4	4	4	3	3.4	2	2	2	1	1	1	1	2	2	4	2
460	0	13	8	2	2	3	4	3	2	4	3	3	4	3	1	3	3	2	2	3	2	3	2	1	3	2	2.3	4	4	4	4	4	3	4	4	4	4	3.9	3	1	4	6	3	3	3	1	1	4	3
461	0	10	9	2	1	2	3	2	3	1	2	3	5	5	3	3	3	4	3	3	3	3	4	3	4	4	3.4	5	5	5	5	4	5	5	5	4	4	4.7	3	3	1	4	1	2	3	3	3	2	3
462	0	12	4	4	4	4	3	4	3	4	4	3	4	5	4	3.77778	4	3	4	4	3	3	4	4	4	3	3.6	4	3	3	5	3	4	4	2	4	3	3.5	3	3	4	4	5	4	2	3	2	2	4
463	0	12	10	3	1	3	4	4	4	4	4	3	5	4	5	4.11111	5	4	4	5	3	4	5	4	5	4	4.3	5	5	5	5	5	5	4	5	5	4	4.8	5	5	5	6	6	6	5	4	6	6	5
464	1	14	8	5	4	3	4	3	4	3	3	4	3	4	2	3.33333	5	5	5	4	4	5	5	5	5	4	4.7	4	4	3	3	2	4	3	1	3	3	3	3	3	4	3	6	3	3	3	2	3	4
465	1	12	3	4	5	4	4	5	5	5	5	5	5	5	5	4.88889	3	2	3	4	4	3	3	3	3	4	3.2	2	3	3	3	3	2	3	3	2	1	2.5	3	3	3	4	3	4	4	4	4	3	3
466	1	11	8	4	1	1	4	4	4	5	5	4	5	4	5	4.44444	4	4	4	2	3	3	4	3	4	4	3.5	3	3	3	3	2	3	3	2	3	3	2.8	3	2	1	2	3	2	3	1	1	1	1
467	0	14	9	3	4	4	3	4	1	1	3	3	1	2	2	2.22222	5	5	5	5	5	5	5	5	5	5	5	5	5	5	5	5	5	5	5	5	5	5	5	4	5	5	4	5	5	4	6	5	4
468	1	11	7	3	5	5	2	4	2	2	3	2	4	3	3	2.77778	4	4	4	3	4	4	4	4	4	4	3.9	5	4	5	5	5	5	5	5	5	5	4.9	4	5	4	5	5	4	4	4	4	4	4
469	1	14	1	3	1	3	3	3	3	2	4	4	2	2	2	2.77778	4	5	5	4	4	5	4	5	5	4	4.5	3	4	4	5	4	4	5	3	4	5	4.1	3	3	3	3	2	4	2	3	3	2	1
470	1	13	3	4	4	3	1	2	1	2	2	1	2	2	2	1.66667	5	5	5	5	5	5	5	5	4	4	4.8	5	5	4	5	4	5	5	5	5	5	4.8	4	4	4	3	5	3	5	5	5	3	3
471	1	11	10	2	5	1	5	5	4	4	4	5	5	5	4	4.55556	3	5	4	4	4	4	3	4	3	2	3.6	4	4	5	4	5	5	4	4	4	3	4.2	3	3	3	2	3	4	4	3	4	4	5
472	1	13	2	3	3	2	5	4	5	4	5	4	5	4	5	4.55556	3	3	2	3	3	4	4	4	3	4	3.3	3	3	4	2	5	4	4	3	3	4	3.5	1	3	3	2	5	2	3	2	2	3	3
473	0	11	1	3	2	2	1	3	1	2	3	2	3	2	2	2.11111	5	5	5	5	5	5	5	5	5	5	5	5	4	5	5	5	4	5	5	5	4	4.7	6	5	5	6	6	6	5	4	4	5	5
474	1	13	4	3	1	1	4	2	2	2	2	1	3	3	3	2.44444	3	2	4	2	3	3	3	4	3	4	3.1	3	3	4	3	3	3	2	2	2	3	2.8	4	4	4	4	4	4	4	4	6	4	4
475	1	13	7	4	4	5	2	3	3	4	4	1	3	2	3	2.77778	3	4	2	3	2	2	3	3	3	3	2.8	4	4	5	5	5	5	4	5	5	5	4.7	5	4	5	4	6	5	6	5	4	4	4
476	1	11	2	1	3	2	1	3	4	1	2	2	1	2	2	2	5	5	5	4	5	5	5	5	4	5	4.8	4	5	5	5	5	5	5	5	5	4	4.8	5	5	4	4	4	4	3	5	3	4	5
477	0	11	4	2	4	3	5	5	5	5	5	5	5	5	5	5	1	1	3	2	4	2	3	3	1	2	2.2	3	1	3	3	3	3	3	3	3	3	2.8	2	2	3	1	3	1	1	1	3	2	3
478	0	10	1	2	5	1	5	4	4	4	4	4	5	5	5	4.44444	4	4	5	3	4	5	5	5	4	4	4.3	3	3	3	2	2	2	1	3	2	1	2.2	3	4	4	4	3	3	4	4	1	3	4
479	0	11	2	2	2	2	4	4	3	2	4	2	4	3	3	3.22222	1	1	2	2	3	3	3	2	3	1	2.1	3	3	3	3	4	1	3	3	3	1	2.7	4	3	3	4	2	3	6	5	4	2	4
480	1	12	1	2	1	3	3	2	1	4	2	2	3	3	3	2.55556	5	5	5	4	4	5	5	4	5	5	4.7	3	4	2	5	4	4	5	5	4	4	4	3	1	3	3	4	2	3	1	1	2	1
481	1	12	2	5	3	1	5	5	5	3	5	5	5	5	5	4.77778	5	4	4	4	4	5	5	4	4	5	4.4	3	4	4	3	3	3	4	3	3	3	3.3	4	4	4	6	5	4	4	4	5	3	4
482	1	10	1	5	2	1	4	3	4	4	4	4	4	4	4	3.88889	4	2	3	3	3	3	4	4	3	4	3.3	3	3	3	4	2	3	3	4	3	3	3.1	2	2	3	1	1	2	1	2	3	1	2
483	0	10	3	2	3	4	5	4	5	5	5	5	4	5	5	4.77778	4	5	3	3	5	4	5	4	4	3	4	4	5	4	5	5	5	4	4	3	4	4.3	3	6	3	4	4	4	3	4	5	4	5
484	1	13	2	2	1	2	4	4	5	5	5	4	5	4	5	4.55556	2	2	3	2	2	3	3	3	4	1	2.5	2	3	3	3	3	3	2	3	1	1	2.4	3	2	3	2	3	1	4	4	1	3	1
485	0	14	2	4	1	1	3	4	3	1	4	4	4	3	3	3.22222	2	2	2	1	3	2	3	3	1	4	2.3	4	4	5	4	5	4	4	4	4	4	4.2	5	3	5	4	3	4	4	4	6	4	4
486	0	13	9	4	5	5	4	4	3	5	5	3	5	3	4	4	1	2	2	2	2	2	1	1	1	2	1.6	4	3	3	4	3	3	4	3	5	2	3.4	3	3	2	2	3	2	2	5	4	5	2
487	0	10	1	5	1	2	3	4	1	3	2	3	2	3	2	2.55556	1	2	3	3	1	3	3	2	3	2	2.3	3	4	4	4	3	4	4	4	4	4	3.8	1	4	3	2	3	3	3	4	3	3	4
488	1	11	3	2	1	3	2	1	2	2	3	3	3	4	3	2.55556	4	4	4	5	4	4	5	5	4	5	4.4	3	3	4	2	3	4	3	3	3	3	3.1	3	3	2	1	2	4	1	3	2	3	2
489	1	12	3	2	1	1	5	4	4	3	5	5	5	5	4	4.44444	4	3	5	4	3	4	4	4	4	4	3.9	3	3	3	3	4	3	4	2	3	4	3.2	3	3	4	4	6	2	4	2	1	3	3
490	0	14	6	3	5	5	5	4	5	4	5	4	5	4	5	4.55556	3	5	4	4	3	5	4	4	4	5	4.1	3	3	1	3	1	3	1	3	3	2	2.3	2	2	1	2	3	3	1	2	1	4	3
491	1	12	9	3	5	5	4	4	5	5	5	5	3	5	4	4.44444	2	3	4	1	3	3	3	3	1	4	2.7	3	3	4	4	4	3	3	3	4	3	3.4	2	2	4	4	5	4	2	4	3	3	2
492	1	11	10	1	5	4	5	5	5	5	4	5	5	5	5	4.88889	2	1	2	3	3	3	3	3	3	3	2.6	5	4	5	4	5	5	5	5	4	4	4.6	6	4	4	6	6	5	5	4	4	6	4
493	1	13	4	2	4	5	5	5	5	5	5	5	5	4	5	4.88889	5	3	4	3	3	3	4	4	4	3	3.6	3	3	3	3	4	3	2	4	1	2	2.8	2	3	2	3	3	1	2	3	2	3	2
494	1	11	4	1	2	2	5	5	4	5	5	5	4	5	5	4.77778	5	4	4	4	3	5	4	4	4	5	4.2	4	4	4	4	4	4	4	4	4	3	3.9	4	6	5	4	6	5	4	5	4	5	5
495	1	10	8	2	2	2	5	4	4	5	5	5	5	5	5	4.77778	5	5	4	4	3	4	4	4	4	4	4.1	3	2	3	3	3	2	3	3	1	3	2.6	3	2	1	3	3	3	3	2	3	3	5
496	0	10	4	2	2	2	3	2	2	1	3	3	4	1	3	2.44444	5	4	5	5	4	5	5	4	4	4	4.5	4	4	3	3	3	4	4	3	4	3	3.5	3	3	4	3	3	3	4	4	2	4	3
497	1	11	6	3	2	2	1	2	1	3	2	3	2	3	2	2.11111	4	5	5	5	5	5	4	5	5	5	4.8	4	3	4	3	5	5	4	4	5	5	4.2	4	5	4	5	6	6	5	4	5	4	6
498	0	14	9	1	4	5	5	4	4	4	5	5	4	4	5	4.44444	4	2	4	3	4	3	4	3	4	4	3.5	4	4	3	4	4	4	5	5	5	5	4.3	4	4	4	4	4	3	3	4	3	4	3
499	0	12	10	2	5	5	2	1	3	2	3	2	2	4	2	2.33333	4	4	5	4	4	5	4	3	4	5	4.2	5	4	4	3	4	4	3	4	4	3	3.8	4	3	4	5	3	5	4	4	3	3	4
500	1	11	10	3	3	3	3	1	2	4	1	2	2	2	2	2.11111	5	5	5	4	4	5	5	4	5	5	4.7	5	5	5	5	5	4	5	5	5	4	4.8	5	4	4	6	5	5	6	4	6	6	5
501	1	12	9	4	2	2	5	4	5	5	5	5	5	5	5	4.88889	2	3	1	3	1	3	3	3	3	1	2.3	3	3	3	3	1	3	4	3	3	3	2.9	4	4	4	4	3	3	3	2	3	3	3
502	0	11	3	4	5	4	4	3	3	3	3	5	3	4	2	3.33333	3	2	3	3	3	2	3	3	3	3	2.8	4	4	2	4	4	3	4	5	3	3	3.6	2	2	4	3	2	4	2	2	1	2	1
503	1	13	3	1	1	2	2	4	3	3	3	1	2	3	3	2.66667	5	5	4	5	4	5	5	5	4	5	4.7	5	5	5	5	4	5	4	4	4	4	4.5	4	4	4	3	3	3	4	4	4	6	4
504	1	11	10	2	5	4	5	5	5	4	5	5	5	5	5	4.88889	4	3	4	3	2	4	4	3	4	3	3.4	3	5	3	3	2	3	3	3	1	2	2.8	2	1	3	3	3	2	1	3	2	3	3
505	1	14	9	4	4	3	4	4	5	3	5	4	4	3	4	4	2	1	3	1	2	1	3	3	1	1	1.8	3	3	3	5	3	4	4	2	3	4	3.4	3	3	4	3	1	3	1	4	1	2	2
506	1	10	10	5	3	5	3	3	1	1	3	3	3	3	3	2.55556	5	4	4	3	3	3	3	4	5	5	3.9	3	5	3	5	5	5	4	5	5	3	4.3	4	4	5	4	6	4	5	5	6	4	5
507	1	13	3	2	2	2	4	4	5	5	5	5	4	5	4	4.55556	4	4	5	4	4	4	5	4	5	4	4.3	4	4	4	4	4	4	5	4	4	4	4.1	4	5	4	3	3	3	4	4	3	4	4
508	1	10	4	5	2	2	2	2	2	2	2	1	3	3	2	2.11111	3	2	3	3	3	2	3	3	4	4	3	5	5	5	5	5	4	5	5	4	3	4.6	1	1	4	2	3	3	2	3	3	3	4
509	0	13	8	3	1	1	5	5	5	5	4	5	5	4	5	4.77778	3	2	2	2	1	3	3	3	3	2	2.4	1	1	3	3	2	1	2	2	3	3	2.1	2	3	4	1	3	1	2	3	3	3	3
510	0	12	9	5	4	4	3	4	4	5	3	4	4	4	5	4	4	3	4	3	3	3	5	3	3	3	3.4	4	4	5	3	4	4	3	4	3	3	3.7	3	3	3	4	4	3	1	4	1	3	3
511	1	10	4	1	1	1	4	5	4	5	4	4	5	3	5	4.33333	5	4	4	4	5	4	3	5	5	4	4.3	3	4	4	4	3	3	4	4	4	4	3.7	3	3	3	3	3	3	4	5	2	1	1
512	0	11	9	5	4	2	3	4	1	3	3	4	3	3	1	2.77778	3	2	3	3	4	3	3	3	4	3	3.1	4	3	5	4	4	4	3	4	4	5	4	3	3	3	4	3	3	5	3	4	3	3
513	0	14	4	3	5	4	3	3	3	4	4	3	5	4	4	3.66667	2	4	2	2	1	3	3	3	1	2	2.3	4	4	3	3	4	1	4	4	3	2	3.2	1	2	3	3	1	3	1	2	1	3	3
514	1	14	8	2	5	5	5	5	5	5	5	4	4	5	5	4.77778	3	1	2	3	3	3	4	3	3	3	2.8	4	4	4	5	4	4	4	4	4	4	4.1	3	3	2	4	3	2	2	3	2	4	2
515	1	10	7	3	1	2	3	3	4	4	1	3	4	2	4	3.11111	4	3	4	4	3	3	4	4	4	3	3.6	4	4	5	4	4	4	5	4	4	5	4.3	3	3	4	3	1	4	3	5	3	3	3
516	0	10	5	5	5	5	3	4	4	4	4	4	5	2	2	3.55556	4	4	5	4	5	4	5	4	5	5	4.5	5	5	4	5	5	5	4	4	5	4	4.6	3	3	4	1	3	3	1	4	2	1	2
517	0	14	10	4	3	4	2	3	3	1	3	1	1	2	2	2	2	4	3	3	3	3	3	4	4	4	3.3	4	5	4	4	5	5	5	5	5	5	4.7	3	2	3	3	2	1	2	1	1	3	3
518	1	12	3	2	1	1	3	5	5	3	5	5	4	4	4	4.22222	4	4	4	4	4	4	4	4	4	4	4	3	3	3	3	3	3	3	3	3	3	3	2	2	2	4	2	2	1	2	3	2	2
519	0	14	1	1	1	2	4	1	2	4	4	4	5	4	4	3.55556	5	5	5	4	4	4	5	4	4	4	4.4	3	4	3	3	4	3	3	3	1	3	3	5	6	4	6	6	3	4	5	4	4	4
520	0	11	4	2	1	3	4	5	4	4	5	4	5	5	4	4.44444	4	3	4	3	4	4	3	4	4	3	3.6	3	4	3	3	3	2	3	3	2	2	2.8	2	1	2	1	1	2	1	1	2	1	1
521	1	14	1	1	3	3	3	2	2	3	3	2	3	4	3	2.77778	4	5	4	5	3	4	4	3	5	5	4.2	3	3	3	1	3	3	3	3	3	3	2.8	2	2	2	2	1	1	1	1	1	2	2
522	0	14	10	4	1	5	4	3	2	5	3	2	5	4	2	3.33333	5	5	5	5	4	5	5	5	5	4	4.8	5	5	5	5	5	5	5	4	4	4	4.7	3	3	3	3	1	2	2	3	4	3	2
523	0	12	5	5	3	3	4	3	3	3	4	4	3	5	3	3.55556	3	5	4	4	5	4	4	4	4	4	4.1	4	5	5	5	4	5	5	5	3	3	4.4	4	3	2	4	2	3	4	3	2	3	2
524	1	13	5	1	1	1	2	4	3	2	3	2	3	2	2	2.55556	5	4	4	5	4	4	4	4	5	5	4.4	3	4	2	3	4	2	4	4	3	3	3.2	2	3	3	3	3	3	1	3	1	3	2
525	1	13	9	1	2	3	3	2	5	4	3	3	4	4	3	3.44444	3	1	1	1	3	2	2	2	2	1	1.8	4	3	4	4	3	4	4	4	4	3	3.7	2	1	3	1	2	2	1	1	3	3	1
526	0	12	5	4	4	5	5	5	4	5	4	5	4	5	5	4.66667	2	2	1	3	4	3	3	4	1	2	2.5	1	3	3	1	1	1	1	3	2	3	1.9	3	2	4	2	3	2	2	2	1	1	2
527	0	10	4	2	2	4	3	2	3	5	3	2	3	2	3	2.88889	5	5	5	5	4	5	5	5	5	4	4.8	4	5	4	5	4	4	5	5	4	5	4.5	3	4	4	6	4	4	4	5	5	6	4
528	0	11	10	2	2	4	5	5	5	5	5	5	5	5	5	5	4	3	3	3	2	4	4	3	3	3	3.2	3	1	2	5	4	4	4	3	3	4	3.3	2	2	3	1	1	3	2	2	1	3	3
529	1	13	5	1	3	2	3	4	3	1	4	3	2	3	2	2.77778	5	5	5	5	5	5	4	5	5	5	4.9	5	3	3	4	5	4	4	4	4	3	3.9	4	3	3	5	4	4	1	3	3	3	4
530	0	11	5	2	1	2	3	4	3	1	3	2	5	2	3	2.88889	5	4	4	4	4	5	4	4	4	5	4.3	5	5	4	4	5	5	4	5	5	5	4.7	3	2	4	2	4	4	3	3	4	4	3
531	1	11	9	5	5	3	4	3	4	5	3	2	5	4	3	3.66667	5	5	4	5	5	4	5	4	5	5	4.7	4	4	5	4	5	5	5	5	4	5	4.6	1	2	2	3	1	2	3	2	2	3	1
532	0	10	10	2	4	5	4	5	3	5	3	2	5	4	5	4	4	4	4	4	4	3	1	4	4	5	3.7	4	5	5	5	4	5	4	5	4	5	4.6	2	2	2	4	5	3	2	4	2	2	1
533	1	10	2	3	2	2	3	2	4	3	3	3	3	3	2	2.88889	5	5	5	4	4	5	5	4	4	4	4.5	4	4	5	5	4	4	3	4	4	3	4	4	5	5	6	5	4	4	4	3	5	5
534	0	14	7	3	3	2	4	4	4	4	4	3	5	5	4	4.11111	4	4	4	3	4	4	5	4	3	5	4	4	4	3	3	5	5	3	3	5	4	3.9	5	4	6	4	5	4	5	5	4	4	5
535	1	14	7	5	5	5	4	1	3	2	4	2	3	4	3	2.88889	5	5	5	5	4	5	4	5	5	5	4.8	5	5	5	5	4	5	5	5	5	5	4.9	4	6	3	4	5	3	3	4	4	4	5
536	1	13	7	2	4	4	3	3	2	2	2	4	3	2	2	2.55556	5	5	5	5	4	4	5	5	5	4	4.7	5	5	5	5	5	5	5	5	4	5	4.9	2	1	2	2	3	1	2	1	2	2	1
537	1	12	10	2	3	5	5	4	4	4	4	4	3	4	4	4	5	5	4	3	3	4	3	4	4	4	3.9	5	4	4	5	4	4	4	4	5	4	4.3	1	2	3	3	3	2	2	2	3	4	2
538	0	11	1	3	4	3	2	1	2	5	3	3	3	2	2	2.55556	5	5	5	5	4	5	5	5	5	5	4.9	5	5	5	5	5	5	4	4	4	5	4.7	4	5	6	5	3	6	4	5	4	4	6
539	1	10	9	2	5	5	2	1	2	1	3	2	3	3	2	2.11111	5	4	5	5	4	5	5	5	5	5	4.8	4	4	4	5	3	4	5	4	5	5	4.3	3	4	4	5	4	4	6	5	4	4	4
540	1	11	9	5	5	5	3	2	2	4	2	3	4	2	4	2.88889	5	5	5	3	5	5	5	5	5	5	4.8	4	4	5	5	5	5	5	4	5	5	4.7	4	5	4	4	3	5	4	5	4	6	4
541	0	11	3	2	1	1	4	2	3	3	4	3	4	2	4	3.22222	4	4	3	4	5	3	3	4	3	4	3.7	3	4	4	4	3	4	3	3	2	2	3.2	4	4	3	5	3	3	5	4	4	6	6
542	0	14	8	4	4	5	5	4	4	5	3	4	5	4	4	4.22222	2	1	2	3	1	3	4	3	1	1	2.1	2	2	3	3	3	3	1	3	3	3	2.6	3	2	4	4	2	4	2	3	4	3	2
543	0	10	4	4	4	4	1	2	3	4	3	3	3	2	3	2.66667	2	2	3	3	3	3	3	3	3	1	2.6	4	4	5	4	4	4	5	4	5	5	4.4	4	3	3	3	6	4	6	4	4	6	5
544	1	10	4	5	1	1	2	4	1	1	4	3	3	4	2	2.66667	2	2	1	2	3	3	2	3	2	4	2.4	5	5	4	4	4	4	5	5	4	4	4.4	3	3	2	3	2	1	3	4	3	1	1
545	1	13	10	2	3	5	1	3	4	1	2	2	3	2	2	2.22222	5	5	4	3	4	4	5	5	5	4	4.4	4	5	5	5	5	5	5	5	5	5	4.9	5	4	6	4	5	4	4	6	3	4	6
546	0	12	7	1	3	4	5	5	4	4	5	4	5	4	5	4.55556	3	3	4	3	1	4	2	4	3	3	3	5	4	5	5	5	5	5	5	5	4	4.8	4	5	6	6	6	5	6	5	5	5	5
547	1	10	6	1	3	1	2	3	2	2	3	1	3	4	4	2.66667	2	3	4	3	3	4	3	3	3	3	3.1	3	3	4	4	4	3	3	4	3	3	3.4	1	4	3	3	1	3	2	4	3	5	3
548	1	14	10	3	5	5	2	1	2	3	2	1	2	2	2	1.88889	2	2	1	3	3	3	3	3	3	3	2.6	4	4	5	4	5	5	5	4	2	5	4.3	1	2	5	4	4	2	3	2	2	3	3
549	0	10	9	4	3	4	4	4	4	4	4	5	5	4	4	4.22222	2	1	1	3	3	1	3	2	3	2	2.1	3	4	3	4	3	3	3	4	3	2	3.2	2	3	4	4	3	3	3	3	2	3	3
550	1	13	3	3	1	2	5	5	5	5	4	5	5	5	5	4.88889	3	3	1	3	3	2	2	4	1	4	2.6	4	3	5	3	3	4	4	4	3	4	3.7	4	4	4	6	4	4	2	4	3	4	4
551	1	10	9	4	5	3	4	4	2	4	3	4	4	4	3	3.55556	2	2	3	2	1	2	1	3	2	3	2.1	4	5	3	4	4	5	4	4	3	4	4	2	2	2	3	6	3	1	4	3	3	2
552	1	11	5	3	4	5	3	4	4	5	4	4	3	4	2	3.66667	5	5	5	3	4	4	4	5	5	5	4.5	4	4	5	5	4	5	5	4	4	5	4.5	5	3	3	3	4	4	5	5	6	4	6
553	1	12	6	5	3	1	5	5	5	5	5	5	5	5	5	5	2	2	2	3	3	2	3	3	1	3	2.4	3	3	3	2	3	1	3	3	2	1	2.4	2	2	4	4	3	3	2	1	2	1	3
554	0	14	10	5	1	3	4	4	4	4	5	4	4	4	4	4.11111	3	4	3	3	3	3	3	4	3	4	3.3	4	4	5	5	5	5	5	5	4	4	4.6	5	3	3	6	2	4	5	2	5	3	3
555	1	11	8	3	5	5	4	5	4	4	4	4	4	3	4	4	2	2	2	3	3	1	3	3	2	3	2.4	3	3	3	4	3	3	4	3	3	3	3.2	1	1	3	2	2	3	3	1	2	1	2
556	0	13	2	3	3	1	3	2	2	2	3	2	3	2	3	2.44444	5	5	4	5	5	5	4	5	5	4	4.7	4	5	5	5	5	5	4	5	5	4	4.7	3	3	4	5	3	4	4	4	3	4	3
557	0	11	9	5	3	4	4	4	5	5	4	4	4	3	3	4	4	4	4	3	4	3	4	4	4	4	3.8	5	5	5	4	5	5	4	5	4	5	4.7	4	4	3	3	5	4	4	4	4	5	4
558	1	13	9	4	3	2	3	4	1	4	3	4	5	4	4	3.55556	3	2	2	1	3	3	4	3	1	2	2.4	3	4	3	4	4	4	3	3	4	3	3.5	4	4	6	5	5	5	4	4	5	4	5
559	1	13	9	5	3	4	3	4	3	3	5	2	4	3	4	3.44444	1	2	3	3	1	3	3	3	3	3	2.5	4	5	5	4	3	5	4	4	5	4	4.3	1	1	3	3	1	2	1	2	3	1	1
560	1	14	4	4	1	1	4	4	3	4	4	3	5	4	5	4	4	3	4	3	3	4	4	3	4	4	3.6	4	4	5	4	5	3	5	5	3	4	4.2	3	3	4	5	3	3	5	5	3	5	4
561	1	13	4	4	5	4	5	5	5	5	5	5	5	5	5	5	4	3	3	3	3	3	3	4	3	4	3.3	3	4	3	3	4	3	4	3	4	3	3.4	2	3	2	3	1	2	2	1	1	2	1
562	1	10	8	2	4	3	2	2	3	2	2	4	3	4	2	2.66667	5	4	4	5	3	4	4	4	4	5	4.2	5	5	5	5	5	5	5	4	5	5	4.9	3	3	1	2	1	2	1	2	1	2	1
563	1	14	6	4	5	5	2	4	3	3	2	1	3	1	2	2.33333	5	5	5	5	5	5	5	5	5	5	5	4	5	5	5	5	5	5	5	4	5	4.8	6	6	4	6	5	5	5	5	6	4	5
564	0	10	5	5	5	4	5	5	3	4	5	4	3	5	4	4.22222	3	4	3	4	3	3	3	3	4	4	3.4	4	4	4	5	4	5	5	5	5	4	4.5	4	3	6	6	4	3	4	4	3	3	3
565	0	14	1	2	1	1	4	3	3	2	4	1	2	4	4	3	5	4	4	4	4	4	4	4	3	3	3.9	3	4	3	4	4	4	4	4	3	3	3.6	4	3	6	6	6	4	6	6	3	4	4
566	0	10	8	4	2	1	4	3	3	1	3	3	4	3	3	3	5	5	5	5	4	5	4	4	5	4	4.6	3	3	3	4	4	2	1	3	2	3	2.8	3	1	2	2	3	3	2	2	2	3	3
567	1	12	5	1	3	2	4	3	2	3	2	2	4	4	3	3	4	4	4	4	5	4	3	5	5	5	4.3	1	3	2	3	3	3	3	3	3	3	2.7	3	3	4	3	4	5	5	4	4	3	6
568	1	14	1	1	1	2	5	5	5	4	4	4	3	5	4	4.33333	4	3	3	3	3	3	3	3	3	4	3.2	1	3	3	1	3	3	3	3	2	1	2.3	2	3	3	1	1	2	2	2	3	2	1
569	1	14	6	3	1	2	4	3	2	3	2	2	4	4	2	2.88889	4	4	4	4	3	5	4	5	5	4	4.2	4	4	5	5	4	5	4	5	4	5	4.5	3	5	3	5	5	4	4	4	4	4	4
570	0	14	4	2	1	1	5	5	5	4	5	5	5	5	5	4.88889	3	4	4	3	3	3	3	3	3	4	3.3	4	3	3	2	5	4	3	3	4	3	3.4	3	2	4	4	4	4	5	1	3	4	3
571	0	14	1	3	5	2	5	4	4	4	5	4	5	4	5	4.44444	4	4	5	5	4	4	5	4	4	5	4.4	4	4	3	3	4	5	4	5	3	4	3.9	3	3	3	2	5	3	4	4	2	4	4
572	1	13	9	5	4	4	4	4	2	3	4	4	3	4	4	3.55556	5	5	5	5	5	5	5	5	4	5	4.9	5	5	5	5	5	5	5	5	4	5	4.9	5	6	5	6	6	6	6	4	5	6	5
573	1	13	7	5	3	5	1	2	2	2	2	3	1	3	1	1.88889	5	5	5	5	4	5	5	5	5	5	4.9	5	5	5	5	5	5	5	5	4	4	4.8	1	2	4	1	1	2	3	2	3	4	3
574	1	11	9	1	4	4	4	4	4	5	4	4	4	4	4	4.11111	3	3	4	3	4	3	3	3	3	3	3.2	2	3	3	3	3	4	3	2	3	3	2.9	5	4	5	6	4	4	4	4	4	6	4
575	1	11	9	4	5	5	4	4	3	4	4	4	3	4	4	3.77778	4	4	3	3	3	4	4	4	4	4	3.7	4	3	5	5	4	5	4	4	4	4	4.2	5	4	3	4	4	6	3	4	4	4	5
576	1	11	7	2	1	1	2	3	3	2	3	3	2	4	3	2.77778	3	2	2	3	4	4	3	5	4	5	3.5	4	5	5	4	5	4	5	5	5	3	4.5	6	5	4	6	5	4	5	5	4	6	6
577	1	10	9	2	4	3	2	2	4	4	3	3	4	2	2	2.88889	4	4	2	4	3	4	3	4	5	4	3.7	4	5	5	5	4	5	5	4	5	5	4.7	4	3	3	5	5	3	4	3	1	3	4
578	1	13	10	4	3	5	5	4	4	5	5	4	5	5	5	4.66667	3	1	2	3	2	3	3	2	2	3	2.4	3	3	3	3	3	4	1	3	2	3	2.8	3	3	3	2	3	4	3	1	3	3	5
579	1	14	8	5	4	5	1	3	2	1	3	2	2	2	2	2	4	4	5	3	2	3	3	3	4	4	3.5	4	4	5	5	5	5	5	4	4	4	4.5	3	3	5	5	3	5	2	3	3	5	5
580	0	11	7	3	4	4	2	3	1	3	3	2	2	1	2	2.11111	5	5	5	5	4	4	5	5	5	5	4.8	3	3	4	4	3	4	3	4	3	3	3.4	3	2	3	2	4	3	3	3	4	3	3
581	1	11	6	4	4	1	2	4	3	2	2	3	2	1	4	2.55556	3	4	3	3	4	3	3	3	4	4	3.4	5	5	5	4	4	5	5	4	5	5	4.7	3	3	3	3	3	4	2	3	4	1	3
582	1	11	8	5	3	4	1	1	1	3	4	3	4	4	3	2.66667	3	1	3	3	1	3	4	3	4	4	2.9	5	4	5	4	5	5	5	5	4	4	4.6	4	5	5	4	6	4	4	4	3	4	5
583	0	12	10	2	1	1	3	2	2	2	1	1	2	4	2	2.11111	3	3	1	2	3	3	3	3	3	3	2.7	5	4	5	5	5	5	5	5	4	4	4.7	1	3	2	4	3	1	3	3	2	2	3
584	0	10	2	1	3	3	4	5	4	3	5	5	4	4	5	4.33333	5	4	5	3	4	4	3	4	4	5	4.1	3	3	3	3	2	3	3	3	1	1	2.5	2	2	2	4	3	2	3	3	3	2	3
585	1	11	10	4	1	2	3	4	3	4	2	3	2	3	2	2.88889	2	1	2	3	1	2	2	2	1	2	1.8	3	4	4	4	4	5	4	4	3	4	3.9	2	2	2	2	3	3	3	3	3	4	4
586	1	13	5	5	4	5	3	2	3	2	2	1	2	4	2	2.33333	5	5	5	5	5	4	5	4	4	4	4.6	4	5	3	4	4	4	4	4	4	4	4	5	5	3	4	3	4	3	4	5	5	6
587	0	13	8	3	4	3	5	4	5	4	5	5	5	5	5	4.77778	4	2	2	3	3	3	3	3	3	4	3	3	3	3	3	2	4	3	3	5	2	3.1	1	2	2	2	2	2	2	1	2	1	2
588	1	14	9	5	5	5	5	5	5	5	5	5	4	5	5	4.88889	4	4	3	4	3	2	3	5	3	4	3.5	4	4	5	4	4	5	4	4	4	4	4.2	3	3	4	2	3	2	3	2	3	4	3
589	1	11	10	5	5	5	3	4	4	5	5	3	5	4	4	4.11111	5	4	4	3	3	3	3	2	4	4	3.5	5	4	4	4	5	5	5	5	5	5	4.7	4	4	4	6	4	4	4	5	5	4	4
590	0	10	4	4	3	3	4	4	4	3	3	3	5	4	4	3.77778	1	3	2	3	3	3	2	3	3	4	2.7	5	4	4	4	5	4	4	4	5	4	4.3	4	5	4	6	4	5	4	4	6	6	6
591	1	12	8	4	2	3	3	4	3	2	4	5	4	5	2	3.55556	4	4	4	4	4	4	5	4	3	5	4.1	4	5	4	5	4	4	5	5	4	4	4.4	2	1	3	3	3	3	4	4	3	4	3
592	1	14	2	1	3	2	5	5	3	5	4	5	4	4	4	4.33333	4	4	4	3	3	3	4	3	4	4	3.6	3	3	3	3	3	4	4	3	3	3	3.2	2	2	3	5	3	2	1	4	2	1	4
593	1	14	10	1	4	1	1	1	1	3	2	2	3	2	2	1.88889	4	3	1	3	3	3	3	2	2	3	2.7	5	5	5	5	5	5	5	5	5	5	5	3	2	4	5	3	4	2	1	1	2	4
594	1	10	8	5	5	5	3	4	5	3	3	1	3	2	4	3.11111	3	3	3	2	5	3	4	3	3	3	3.2	5	5	5	5	5	5	5	4	5	5	4.9	5	5	4	5	3	4	6	4	4	5	5
595	1	10	8	4	4	3	5	5	5	5	5	5	5	4	5	4.88889	4	2	4	3	2	4	4	3	3	3	3.2	2	3	3	3	2	1	3	3	3	3	2.6	5	3	6	4	4	4	2	5	4	6	5
596	1	14	6	2	2	1	5	5	5	4	5	5	5	5	4	4.77778	4	2	4	3	3	3	4	4	4	3	3.4	3	3	3	3	3	4	3	3	3	2	3	3	2	2	2	3	3	3	3	3	2	3
597	0	14	1	1	2	2	5	4	5	4	5	4	5	5	5	4.66667	3	3	2	1	4	3	1	3	3	2	2.5	3	3	2	3	2	3	3	3	1	3	2.6	2	1	4	1	3	2	1	2	1	2	3
598	0	11	10	4	5	5	3	2	2	2	2	1	2	4	1	2.11111	5	4	5	5	4	4	5	4	5	5	4.6	5	5	5	5	5	5	5	5	5	5	5	4	3	3	4	4	5	4	4	3	4	4
599	0	11	6	1	4	4	4	5	5	5	4	4	5	4	5	4.55556	3	2	1	3	3	3	3	3	3	4	2.8	3	3	3	1	3	1	3	3	3	3	2.6	2	2	1	1	2	1	1	1	3	1	1
600	0	14	9	5	2	4	5	5	5	5	5	5	4	4	5	4.77778	3	2	2	3	1	3	3	2	4	1	2.4	4	3	3	5	4	4	4	4	3	3	3.7	2	1	1	2	3	1	1	4	2	3	2
601	0	14	4	1	1	2	1	1	2	2	1	3	3	3	1	1.88889	4	3	4	4	4	5	4	4	4	5	4.1	4	5	5	5	4	5	5	5	4	5	4.7	5	4	5	5	4	3	3	2	2	4	5
602	1	13	6	2	4	5	4	4	3	4	4	5	5	5	5	4.33333	5	4	5	4	5	5	4	4	4	4	4.4	3	3	3	3	2	4	5	1	4	3	3.1	3	4	4	4	1	3	3	4	2	3	4
603	1	11	9	4	2	2	1	4	3	3	3	3	3	2	2	2.66667	2	1	1	2	3	3	4	3	3	3	2.5	4	4	5	4	4	4	4	4	2	4	3.9	3	3	3	2	3	2	2	3	5	3	3
604	0	10	8	1	3	3	1	2	2	4	1	3	1	1	2	1.88889	5	5	5	5	5	5	5	4	4	5	4.8	5	5	5	5	5	5	5	4	4	5	4.8	3	3	2	2	1	2	1	1	3	1	3
605	0	14	10	5	5	5	4	4	2	2	3	4	4	5	4	3.55556	5	2	5	5	5	5	5	5	4	4	4.5	4	5	4	4	4	5	4	5	3	3	4.1	2	3	2	3	4	3	2	1	1	4	3
606	0	13	5	3	3	3	5	4	4	4	4	5	5	5	5	4.55556	4	4	2	3	4	3	4	3	4	4	3.5	4	4	3	4	5	4	4	4	5	3	4	5	5	4	4	4	4	5	4	4	4	3
607	1	10	10	2	2	3	4	2	2	4	3	3	4	2	2	2.88889	2	2	4	3	3	3	3	4	4	2	3	4	4	4	5	4	5	4	4	3	4	4.1	6	4	3	6	3	4	2	4	4	6	5
608	0	14	1	4	4	2	5	5	4	5	5	5	5	5	5	4.88889	3	4	2	2	3	3	3	3	3	3	2.9	2	3	1	3	3	2	3	4	1	1	2.3	1	3	2	2	2	3	2	3	2	3	2
609	0	13	9	3	4	3	3	4	3	4	3	4	4	3	4	3.55556	5	4	4	5	5	4	4	5	4	4	4.4	4	4	3	5	4	5	4	3	4	5	4.1	3	3	4	4	3	3	2	3	3	5	2
610	0	11	1	2	4	2	3	1	4	1	4	3	3	4	2	2.77778	5	5	5	5	5	5	4	4	5	5	4.8	3	4	4	4	3	4	4	3	4	4	3.7	5	4	4	5	5	6	4	5	4	6	4
611	0	10	5	1	4	1	4	4	4	5	5	5	3	5	5	4.44444	4	3	4	3	3	4	3	3	4	4	3.5	4	4	4	4	5	5	4	3	3	4	4	3	3	2	3	3	3	4	1	4	4	2
612	0	11	7	5	5	5	2	3	3	1	4	1	4	2	2	2.44444	5	5	5	5	4	4	5	4	4	5	4.6	5	5	5	5	5	5	5	5	5	5	5	4	3	4	2	6	1	1	3	3	3	4
613	1	12	7	5	4	5	3	4	4	3	2	5	3	2	3	3.22222	5	4	5	4	4	4	3	4	4	4	4.1	3	3	3	3	3	4	2	3	4	3	3.1	3	3	4	3	3	3	4	4	4	6	4
614	0	12	4	5	4	4	5	5	5	5	5	4	5	4	5	4.77778	4	4	4	4	5	5	4	4	3	4	4.1	3	3	3	3	2	4	4	3	3	1	2.9	4	4	4	3	5	4	5	4	5	4	5
615	1	10	9	1	2	2	3	4	4	5	4	5	4	4	4	4.11111	5	5	4	5	4	4	5	4	5	5	4.6	2	4	2	3	3	1	3	3	3	1	2.5	3	3	3	2	4	3	5	3	1	3	4
616	1	13	2	5	4	5	3	2	3	3	3	4	3	3	4	3.11111	2	3	2	1	1	3	3	1	1	3	2	3	4	3	3	3	3	2	3	1	4	2.9	2	2	6	3	4	3	2	2	4	2	3
617	0	14	2	4	1	3	3	2	1	4	3	4	1	4	2	2.66667	5	5	5	5	5	5	5	5	5	5	5	5	4	4	5	4	5	3	5	5	5	4.5	5	5	4	6	5	5	4	4	4	5	5
618	0	14	10	5	5	4	2	2	3	3	4	3	3	4	3	3	5	4	5	4	5	5	5	5	5	5	4.8	5	5	5	5	5	5	5	5	5	5	5	4	4	5	6	4	4	5	4	5	6	4
619	1	14	10	5	4	4	5	5	5	4	5	5	5	5	5	4.88889	3	4	4	5	2	4	4	4	3	2	3.5	4	4	3	4	3	4	5	3	3	3	3.6	3	2	1	2	3	1	1	2	2	4	1
620	1	14	10	4	2	3	5	5	4	4	5	5	4	4	5	4.55556	3	3	3	1	3	3	3	2	3	3	2.7	4	4	5	4	4	4	4	4	4	4	4.1	1	2	3	2	2	4	3	2	2	3	3
621	0	10	10	5	1	3	3	2	2	2	3	5	2	3	2	2.66667	5	5	5	4	5	5	4	5	5	5	4.8	4	3	4	3	3	4	4	5	3	3	3.6	3	3	2	4	4	3	2	5	4	4	4
622	1	14	9	3	4	3	4	4	3	4	5	5	5	4	4	4.22222	3	2	4	3	4	3	4	4	3	4	3.4	3	3	3	3	2	3	3	2	3	3	2.8	3	2	2	1	3	5	4	3	3	4	3
623	1	10	5	1	1	3	3	4	3	4	3	4	4	4	3	3.55556	2	2	4	3	3	3	1	3	4	4	2.9	3	3	4	3	2	3	4	4	3	1	3	3	3	4	5	4	4	3	4	4	6	5
624	1	13	5	1	2	1	3	4	2	4	3	4	4	2	4	3.33333	5	4	5	4	4	4	5	4	4	4	4.3	3	3	3	5	4	5	5	4	4	3	3.9	4	4	3	4	4	1	4	4	4	5	4
625	1	10	6	1	2	2	3	5	5	4	4	4	4	4	5	4.22222	2	1	4	3	3	2	1	2	1	2	2.1	4	3	3	4	3	3	3	3	3	3	3.2	3	6	6	4	5	3	4	4	4	4	4
626	0	12	1	2	5	3	1	2	3	2	1	2	1	3	1	1.77778	5	5	5	4	3	5	4	4	5	5	4.5	5	5	5	5	5	5	5	5	5	4	4.9	5	3	3	4	2	3	4	4	4	2	4
627	1	11	10	1	5	5	5	4	5	4	3	5	4	5	5	4.44444	3	3	3	3	4	3	3	3	4	4	3.3	3	2	3	3	3	3	3	3	3	3	2.9	3	1	3	2	2	2	2	2	2	3	2
628	1	10	4	5	5	3	2	2	1	2	3	3	4	2	2	2.33333	5	5	5	5	5	5	5	5	4	4	4.8	4	5	4	4	4	4	4	3	3	4	3.9	4	3	3	4	5	4	1	4	3	5	5
629	0	12	1	4	5	4	5	3	4	5	3	1	4	5	5	3.88889	5	5	5	5	4	4	5	5	5	5	4.8	4	5	5	5	5	5	5	5	4	4	4.7	4	6	5	4	3	3	4	4	4	4	5
630	0	10	5	3	4	5	3	2	3	2	1	4	3	1	1	2.22222	4	4	3	4	3	3	3	5	4	4	3.7	5	5	5	5	5	5	5	4	5	5	4.9	5	4	4	5	3	4	5	4	5	5	4
631	1	11	2	2	3	3	2	2	3	3	3	3	1	3	2	2.44444	5	4	5	4	4	4	4	5	4	5	4.4	4	4	5	4	5	5	5	5	5	5	4.7	3	4	4	3	4	3	2	4	3	4	5
632	1	11	2	4	2	5	2	1	1	3	3	2	3	2	2	2.11111	3	3	4	3	4	3	3	4	1	4	3.2	5	5	5	5	5	4	4	4	5	4	4.6	3	4	4	6	5	4	1	2	2	3	4
633	1	11	5	3	5	4	5	5	3	4	5	4	4	5	5	4.44444	5	4	4	4	5	4	4	4	4	4	4.2	3	2	3	2	3	1	3	3	3	1	2.4	2	3	2	2	2	3	2	3	3	2	3
634	0	13	10	4	5	5	5	5	4	5	5	5	5	4	5	4.77778	4	5	5	4	4	4	4	4	4	5	4.3	5	5	5	5	5	5	5	4	4	3	4.6	3	4	4	5	4	5	4	4	4	3	5
635	0	14	10	3	5	5	4	3	5	4	4	4	5	5	4	4.22222	1	2	1	1	1	3	3	1	1	3	1.7	4	3	3	4	4	4	4	4	3	4	3.7	5	6	4	4	5	5	5	6	3	6	4
636	0	13	5	1	1	2	4	3	3	2	4	5	3	4	3	3.44444	3	2	2	1	3	2	3	3	1	1	2.1	3	4	4	4	4	3	3	4	3	5	3.7	6	5	6	5	6	6	5	4	4	4	5
637	0	11	2	5	2	5	5	5	5	4	5	5	4	4	5	4.66667	5	4	5	4	4	4	4	4	4	5	4.3	4	4	4	5	3	2	4	4	4	3	3.7	3	3	4	6	6	4	4	4	4	4	4
638	1	14	7	5	5	5	3	3	4	5	5	4	4	4	2	3.77778	2	2	2	3	2	1	1	3	3	1	2	3	2	3	1	4	3	3	3	1	3	2.6	3	2	5	3	3	2	1	2	1	5	3
639	0	11	3	4	5	4	2	3	3	1	3	3	3	3	3	2.66667	5	4	5	5	4	5	4	5	5	5	4.7	4	4	4	5	3	3	5	4	4	1	3.7	4	3	3	2	3	4	3	2	3	5	2
640	1	12	1	3	2	1	4	4	3	2	4	1	3	3	2	2.88889	5	4	5	4	5	5	5	4	4	5	4.6	4	5	4	5	5	5	5	4	4	3	4.4	5	5	6	5	6	4	5	4	6	4	5
641	1	12	3	2	1	1	4	5	5	4	5	5	5	4	4	4.55556	4	3	4	5	4	4	4	4	3	5	4	4	3	3	3	2	3	3	4	1	3	2.9	3	2	2	1	2	3	1	2	1	2	2
642	1	11	2	5	2	4	3	3	2	2	3	2	1	2	2	2.22222	5	5	4	5	5	5	4	4	5	5	4.7	4	5	5	5	5	5	5	5	4	4	4.7	2	3	1	3	3	2	1	1	2	1	1
643	1	14	10	2	5	3	4	5	5	5	5	5	4	4	5	4.66667	4	4	4	4	3	3	4	4	3	4	3.7	3	3	3	3	3	2	3	3	3	3	2.9	3	3	4	1	3	2	1	2	3	3	5
644	0	10	2	3	1	1	4	2	4	4	4	3	4	4	4	3.66667	4	4	5	4	5	4	5	4	5	5	4.5	3	3	2	3	4	2	3	2	3	1	2.6	3	1	2	2	2	4	3	4	4	4	1
645	0	10	1	1	1	2	3	2	4	2	3	3	5	2	2	2.88889	5	5	4	4	5	5	4	5	5	5	4.7	4	5	4	5	4	5	5	5	4	5	4.6	3	2	3	2	1	2	4	4	3	3	4
646	1	13	6	4	4	4	5	4	4	4	5	5	5	5	5	4.66667	3	1	3	3	3	3	3	2	4	4	2.9	3	3	3	3	3	4	3	1	1	3	2.7	1	1	1	3	1	3	3	4	1	4	3
647	1	10	9	5	3	5	3	2	2	3	3	4	3	4	3	3	5	5	5	4	4	5	5	5	4	5	4.7	4	3	5	4	3	5	4	4	4	4	4	4	3	5	4	5	3	2	4	3	3	3
648	1	12	3	3	1	3	2	3	3	4	3	3	4	2	4	3.11111	2	1	3	1	1	2	3	3	1	2	1.9	4	3	3	3	3	4	4	3	3	3	3.3	3	2	3	1	1	2	3	1	3	1	1
649	1	13	3	1	3	4	2	3	4	4	4	4	3	4	4	3.55556	5	5	5	5	5	4	5	4	5	4	4.7	5	5	4	5	4	5	4	4	4	5	4.5	2	1	4	4	2	1	3	4	3	4	4
650	1	14	1	5	3	1	1	2	3	2	1	2	3	3	2	2.11111	4	5	5	4	5	4	5	5	4	4	4.5	3	4	3	3	5	3	3	1	4	1	3	4	3	6	4	5	5	4	6	6	4	4
651	1	14	9	3	2	2	4	5	4	4	4	3	2	4	4	3.77778	5	5	5	5	4	4	5	4	5	5	4.7	3	3	3	1	4	3	4	3	3	3	3	3	3	2	3	1	3	4	2	3	3	4
652	1	12	2	3	1	2	3	4	4	5	4	4	3	5	5	4.11111	4	5	5	3	3	4	4	4	4	4	4	4	3	4	5	3	4	4	4	3	4	3.8	2	2	3	3	2	4	1	1	3	2	3
653	1	12	10	5	3	5	2	2	1	4	1	2	2	4	2	2.22222	5	4	5	5	5	4	4	4	5	5	4.6	5	5	5	5	5	5	4	4	5	4	4.7	4	4	4	4	5	4	2	3	3	4	5
654	0	13	5	5	4	5	1	2	3	3	3	3	3	4	2	2.66667	4	4	5	3	5	4	4	4	4	1	3.8	3	4	4	4	3	5	4	3	4	3	3.7	4	3	4	3	4	4	4	3	3	4	4
655	0	14	8	5	5	5	5	4	5	5	5	5	4	5	5	4.77778	3	4	2	3	3	3	3	3	3	4	3.1	4	5	5	4	4	5	5	4	5	5	4.6	4	4	3	4	4	3	4	4	4	6	4
656	1	14	3	1	3	5	4	4	5	4	4	3	4	5	5	4.22222	2	2	2	3	1	1	2	3	2	2	2	3	4	3	4	3	4	4	3	5	3	3.6	4	3	6	6	6	6	5	4	5	5	4
657	1	11	8	5	5	5	3	4	2	4	2	4	4	1	2	2.88889	3	4	2	3	2	3	3	3	3	3	2.9	3	4	4	3	4	3	4	5	5	3	3.8	4	4	6	6	4	4	3	4	3	5	4
658	1	10	9	4	5	3	5	5	5	4	5	5	4	4	5	4.66667	4	3	2	2	3	4	4	3	3	4	3.2	4	3	4	5	4	4	4	4	4	2	3.8	5	3	4	1	5	4	4	4	6	4	4
659	0	12	5	2	5	2	4	4	4	4	4	4	4	3	4	3.88889	2	2	1	1	3	2	1	3	3	1	1.9	3	3	2	3	3	1	3	3	3	1	2.5	1	1	3	1	3	1	1	2	2	3	2
660	1	12	5	3	3	3	4	3	4	4	5	5	5	5	5	4.44444	1	2	2	1	3	2	2	3	1	1	1.8	3	3	3	3	3	3	4	4	1	3	3	3	3	4	4	1	2	1	3	3	1	1
661	0	13	6	3	4	2	4	2	1	4	3	3	4	4	2	3	3	3	3	3	3	3	2	4	1	3	2.8	3	3	3	5	3	3	3	3	1	2	2.9	3	3	3	4	3	3	5	3	4	4	2
662	1	10	3	1	1	2	3	2	4	3	3	3	3	2	3	2.88889	4	3	3	1	3	3	1	4	3	3	2.8	5	4	4	4	5	5	5	4	5	4	4.5	6	4	4	5	4	4	4	4	4	3	4
663	0	11	3	5	1	3	1	3	1	3	2	3	1	2	1	1.88889	5	5	5	5	5	5	5	5	5	5	5	5	5	4	5	4	5	5	5	5	5	4.8	1	1	2	2	3	1	2	2	3	2	3
664	0	11	2	2	2	2	3	4	4	5	2	2	4	3	4	3.44444	5	2	3	4	3	4	4	4	4	4	3.7	3	4	3	3	3	3	3	1	3	3	2.9	5	3	4	4	6	6	5	4	4	4	6
665	1	14	9	3	5	4	5	5	4	5	5	5	4	4	5	4.66667	5	4	3	5	4	4	4	4	4	5	4.2	5	3	5	3	3	4	4	4	4	4	3.9	2	2	3	1	3	1	1	2	3	3	4
666	1	10	9	5	4	5	1	4	1	3	3	2	3	2	3	2.44444	3	2	2	4	1	4	3	3	3	4	2.9	5	5	5	4	5	5	5	4	4	5	4.7	1	2	2	1	2	2	3	2	3	3	1
667	0	13	2	5	4	4	4	4	4	3	4	5	5	4	4	4.11111	3	1	2	1	2	1	1	2	2	3	1.8	4	3	4	5	4	4	4	4	4	4	4	2	3	3	3	3	4	1	3	2	2	3
668	1	12	8	4	2	1	4	4	5	4	4	5	3	5	5	4.33333	3	2	2	2	3	1	3	2	3	3	2.4	2	2	1	3	3	2	3	3	1	3	2.3	3	3	1	3	2	3	2	1	2	3	2
669	1	13	5	1	2	1	5	5	5	5	5	5	5	5	5	5	2	4	3	1	3	3	4	3	3	4	3	1	3	3	2	3	1	1	3	3	3	2.3	3	2	2	3	3	1	2	2	2	1	2
670	1	14	4	1	1	1	4	3	3	4	4	3	4	4	2	3.44444	2	3	2	1	1	2	1	3	3	3	2.1	1	2	3	3	4	4	3	3	3	3	2.9	5	3	3	5	5	5	4	5	5	5	5
671	0	10	6	1	2	5	3	2	3	3	2	2	3	2	2	2.44444	2	1	2	1	3	3	1	3	1	2	1.9	3	3	3	4	3	4	3	3	3	3	3.2	3	4	3	3	3	2	2	4	3	4	4
672	0	13	2	2	2	2	5	4	4	5	5	4	4	4	5	4.44444	4	4	4	5	3	4	4	4	4	5	4.1	4	5	4	5	5	4	4	4	4	4	4.3	4	5	5	6	6	4	5	4	6	4	4
673	1	13	7	3	4	5	4	4	3	4	1	3	3	4	3	3.22222	5	4	5	5	5	5	5	5	4	5	4.8	3	3	2	4	4	3	4	2	4	3	3.2	3	3	3	3	4	3	3	3	3	3	2
674	1	13	1	2	2	4	3	1	3	3	3	2	1	3	2	2.33333	5	4	4	4	4	4	4	4	4	5	4.2	3	3	3	3	3	4	4	3	4	3	3.3	4	5	5	6	6	3	5	4	3	4	4
675	0	10	6	2	5	1	4	3	5	1	5	4	4	4	3	3.66667	5	5	4	4	5	4	3	4	4	5	4.3	4	5	5	4	5	5	4	4	5	4	4.5	3	3	2	3	3	4	3	2	4	3	2
676	1	13	8	4	5	5	4	3	4	2	2	5	3	4	4	3.44444	4	3	3	4	4	3	5	4	3	4	3.7	5	5	5	5	5	5	4	5	5	4	4.8	5	6	4	6	5	3	5	4	4	6	5
677	1	12	6	4	1	3	4	5	5	5	4	3	3	4	5	4.22222	5	5	5	4	5	5	4	5	5	4	4.7	1	3	3	3	3	2	3	3	3	1	2.5	5	6	6	4	5	5	4	4	4	5	5
678	0	10	10	1	4	5	3	4	3	3	3	4	3	4	4	3.44444	4	3	3	3	3	4	3	4	5	4	3.6	4	3	4	4	4	5	4	4	4	4	4	4	5	4	5	4	4	5	2	5	4	5
679	0	14	4	2	2	2	5	5	5	4	5	5	5	5	5	4.88889	5	5	4	5	3	4	4	4	4	5	4.3	3	3	3	3	2	4	3	4	1	4	3	5	3	6	5	5	5	5	6	4	6	5
680	0	14	4	5	5	5	4	4	4	3	5	5	4	4	3	4	2	3	2	3	3	3	1	3	3	4	2.7	5	5	5	5	5	5	4	5	5	4	4.8	5	6	6	5	5	4	4	6	6	4	4
681	1	12	9	5	2	5	3	4	2	2	4	3	3	2	2	2.77778	4	4	5	5	4	5	4	4	5	5	4.5	3	3	3	2	3	4	4	4	4	1	3.1	3	3	3	4	3	3	4	3	4	3	2
682	0	14	1	1	3	1	2	4	3	3	4	4	4	3	3	3.33333	5	5	5	5	5	5	5	5	5	4	4.9	4	4	4	4	5	5	5	4	5	4	4.4	4	6	5	4	5	3	5	4	4	6	4
683	1	14	2	2	1	2	3	4	2	5	3	2	5	3	3	3.33333	4	4	5	3	4	3	4	4	4	3	3.8	4	4	4	5	4	5	4	3	4	4	4.1	5	6	4	6	6	4	4	3	4	3	4
684	1	10	7	2	1	3	5	5	4	5	5	4	5	5	5	4.77778	4	3	4	3	3	3	4	4	3	3	3.4	3	4	3	4	5	4	4	4	3	4	3.8	3	3	3	3	3	2	3	3	4	3	1
685	1	14	5	3	1	2	5	4	4	5	5	5	4	5	4	4.55556	2	4	3	3	3	3	4	3	3	3	3.1	3	4	3	5	3	4	5	4	4	3	3.8	4	3	3	5	5	4	3	4	3	4	5
686	0	14	8	3	5	4	1	2	2	2	1	3	3	3	1	2	4	5	4	2	3	3	3	4	5	5	3.8	5	5	4	5	4	5	5	5	5	4	4.7	3	3	3	5	5	3	4	3	3	3	4
687	1	12	4	5	5	5	2	2	1	2	2	2	2	2	2	1.88889	4	4	4	3	4	4	4	5	5	4	4.1	4	4	5	5	5	5	5	4	4	5	4.6	2	1	2	1	2	3	2	1	1	3	2
688	1	14	7	4	2	5	4	5	4	1	2	3	3	5	4	3.44444	5	5	5	4	4	5	5	5	4	5	4.7	4	4	4	3	1	3	3	4	3	3	3.2	5	5	6	6	5	5	6	6	4	4	4
689	1	12	7	4	5	4	5	5	5	5	4	5	5	4	5	4.77778	2	1	1	2	2	1	3	3	3	3	2.1	3	1	3	3	3	4	1	2	3	3	2.6	3	4	3	2	3	3	3	3	4	2	3
690	0	14	4	2	2	2	3	4	2	5	3	5	3	4	4	3.66667	3	2	2	3	1	3	3	3	3	3	2.6	3	1	4	3	3	3	2	4	3	3	2.9	4	2	1	1	3	4	4	4	4	3	4
691	0	13	5	1	2	5	4	3	5	5	4	4	3	4	2	3.77778	3	2	3	3	5	4	5	4	5	5	3.9	5	4	5	5	5	5	5	4	4	5	4.7	4	5	6	4	5	4	5	5	4	5	4
692	0	12	10	2	1	5	5	5	4	3	5	5	5	5	5	4.66667	4	4	5	4	3	4	5	4	4	4	4.1	5	4	5	4	4	5	4	4	5	4	4.4	4	3	4	6	4	3	2	4	3	3	4
693	1	11	3	3	5	5	3	1	1	3	3	4	2	3	2	2.44444	5	5	5	4	5	4	5	5	4	5	4.7	5	4	5	5	5	5	5	4	5	5	4.8	3	3	5	4	2	5	4	1	3	3	4
694	0	11	8	1	2	3	1	2	2	3	3	2	2	2	2	2.11111	4	5	4	3	3	4	4	4	4	4	3.9	5	5	5	5	5	5	5	5	5	5	5	2	2	2	1	1	3	1	2	1	4	3
695	1	10	9	5	5	5	4	5	4	4	4	5	4	4	3	4.11111	2	4	4	3	3	3	3	4	4	4	3.4	3	3	3	3	3	2	3	3	2	3	2.8	1	1	2	1	1	1	2	4	1	2	3
696	1	10	8	2	2	3	1	1	1	1	3	2	3	3	2	1.88889	4	3	3	3	3	4	3	4	3	3	3.3	5	5	5	4	5	5	4	4	5	5	4.7	5	5	4	4	4	4	4	4	4	6	2
697	0	13	4	3	4	3	5	5	4	5	5	5	5	4	5	4.77778	3	1	1	3	3	3	2	3	3	2	2.4	1	3	2	3	3	2	1	1	1	1	1.8	2	3	2	2	3	2	3	3	3	1	1
698	0	13	8	5	5	5	1	3	4	2	2	4	5	3	2	2.88889	3	4	3	4	3	4	4	3	4	4	3.6	5	5	5	4	4	5	4	5	4	5	4.6	4	3	6	4	6	3	5	3	4	6	3
699	0	13	8	3	3	3	5	5	5	5	5	5	5	5	5	5	4	2	2	3	3	2	3	3	3	4	2.9	3	1	3	1	3	1	3	4	3	3	2.5	1	2	2	1	1	3	1	1	1	1	3
700	0	12	4	2	2	2	4	5	3	4	4	4	4	4	4	4	2	1	1	1	2	2	2	2	1	3	1.7	3	3	2	3	1	3	3	3	3	2	2.6	3	2	3	2	2	3	4	2	2	4	3
701	0	14	8	1	2	3	5	5	5	4	5	4	4	5	5	4.66667	3	3	2	4	3	4	4	3	3	3	3.2	4	3	3	5	3	4	3	4	3	4	3.6	2	3	4	2	2	1	2	1	3	2	2
702	0	14	3	4	5	4	5	5	4	5	4	5	5	4	5	4.66667	4	2	4	3	3	3	3	3	4	3	3.2	3	3	3	3	1	3	3	3	3	2	2.7	2	2	5	1	3	2	1	4	2	2	2
703	1	14	5	3	1	2	3	1	2	2	2	2	3	2	2	2.11111	5	5	5	5	4	5	5	5	5	5	4.9	4	4	4	4	5	3	4	3	4	3	3.8	4	6	5	6	4	4	5	4	4	4	5
704	1	13	8	1	1	1	2	2	2	4	1	2	2	3	2	2.22222	2	2	3	3	3	4	3	4	3	5	3.2	4	5	5	5	4	5	3	5	5	3	4.4	3	3	2	3	1	4	3	2	3	4	4
705	1	13	10	4	1	1	4	4	4	3	3	4	3	4	1	3.33333	5	5	5	5	5	5	4	5	5	5	4.9	4	5	4	5	4	5	5	5	4	5	4.6	3	3	3	3	3	1	3	2	2	3	4
706	1	11	10	3	4	5	4	3	4	4	3	4	5	5	5	4.11111	2	3	2	3	3	1	1	3	3	3	2.4	3	4	3	4	3	2	4	4	3	3	3.3	1	2	2	1	2	2	2	2	2	1	2
707	1	11	5	2	4	2	5	4	5	4	5	5	4	5	4	4.55556	4	4	4	1	3	3	3	3	4	3	3.2	4	4	4	3	3	4	3	4	3	3	3.5	3	3	2	1	3	3	1	3	3	5	2
708	0	13	5	2	1	1	4	5	4	3	5	4	5	5	4	4.33333	4	4	5	5	3	4	5	4	4	4	4.2	3	1	3	4	5	3	3	4	3	2	3.1	1	2	4	2	1	2	2	2	3	3	2
709	0	11	2	3	1	3	2	3	3	2	3	3	2	3	3	2.66667	5	5	5	5	5	5	5	5	5	5	5	5	5	5	5	5	4	5	5	5	3	4.7	3	3	4	3	3	5	3	4	2	4	1
710	0	14	7	4	4	4	3	1	3	2	3	4	3	3	2	2.66667	3	3	3	3	3	3	4	4	2	3	3.1	3	4	3	3	4	4	3	3	3	4	3.4	5	5	5	6	6	5	5	4	6	6	5
711	1	12	2	5	5	5	3	4	3	3	2	2	3	2	2	2.66667	5	5	5	5	4	5	5	5	5	5	4.9	4	5	5	5	5	5	5	5	5	5	4.9	3	3	4	5	2	3	3	4	4	3	2
712	0	11	5	2	1	1	5	4	4	5	4	5	5	4	4	4.44444	2	2	1	2	2	2	1	3	1	4	2	4	3	4	4	2	4	3	2	4	3	3.3	3	3	3	1	2	4	3	3	1	4	4
713	1	12	5	1	2	2	4	4	4	5	5	5	4	5	5	4.55556	5	4	5	4	4	4	4	5	4	4	4.3	3	3	4	4	3	3	3	5	2	3	3.3	3	2	2	5	3	3	2	3	2	6	3
714	0	11	10	1	3	5	4	3	4	5	4	3	4	4	3	3.77778	2	2	1	3	2	3	2	3	3	4	2.5	3	3	3	3	3	4	3	2	3	3	3	6	6	6	5	5	5	5	5	3	5	6
715	1	14	5	3	3	2	4	4	5	4	4	5	4	5	4	4.33333	3	2	2	3	1	3	3	3	1	4	2.5	3	3	3	3	3	3	4	2	3	3	3	3	3	3	4	3	3	2	4	2	4	1
716	0	14	10	5	5	5	5	4	4	5	4	5	3	5	4	4.33333	4	5	4	4	4	4	4	4	4	3	4	4	3	4	4	3	4	3	3	4	3	3.5	2	4	4	3	4	3	4	2	2	4	3
717	0	11	4	1	3	3	5	5	4	5	5	5	5	5	5	4.88889	4	2	4	4	3	4	3	3	4	4	3.5	3	3	2	2	1	3	4	3	2	1	2.4	3	3	4	4	3	2	2	1	2	4	2
718	1	10	5	3	1	1	5	5	4	4	5	4	3	5	5	4.44444	5	5	5	3	4	4	5	3	5	5	4.4	3	3	4	5	4	4	4	4	4	3	3.8	5	4	6	3	5	4	4	4	6	4	6
719	0	14	9	4	4	1	3	4	1	4	3	4	3	4	4	3.33333	2	1	2	2	2	2	2	2	4	3	2.2	4	4	4	3	5	5	5	4	4	4	4.2	3	2	1	2	1	1	3	3	1	2	4
720	0	12	6	5	4	5	4	4	4	4	3	4	5	4	4	4	5	4	5	3	5	5	4	4	4	4	4.3	3	4	4	2	5	4	4	4	3	3	3.6	2	2	1	1	2	2	2	1	2	3	4
721	0	12	3	4	5	3	3	2	4	4	2	4	4	4	3	3.33333	2	1	3	2	1	3	3	3	3	1	2.2	5	4	4	5	5	5	4	5	4	5	4.6	5	4	5	5	5	4	4	6	6	4	5
722	1	12	5	3	1	1	5	5	4	5	5	5	5	5	5	4.88889	2	3	2	3	2	4	3	3	1	3	2.6	3	3	3	4	4	4	3	3	3	3	3.3	1	4	4	1	2	3	4	3	2	1	3
723	1	12	8	1	1	2	3	3	3	2	3	3	3	4	4	3.11111	3	2	3	3	4	4	4	3	3	3	3.2	4	4	4	4	3	4	4	4	4	4	3.9	4	4	4	4	5	4	5	5	6	3	3
724	0	12	9	5	3	4	4	5	1	3	3	3	5	4	4	3.55556	3	3	3	2	3	3	3	2	1	3	2.6	5	5	5	5	5	5	4	5	4	5	4.8	5	4	5	4	3	4	5	5	4	6	5
725	0	14	10	4	5	5	3	3	3	4	4	4	3	4	2	3.33333	5	5	5	4	4	5	5	5	5	5	4.8	4	4	4	5	4	5	4	4	3	5	4.2	4	5	6	5	6	4	5	5	5	4	5
726	0	11	4	2	3	1	3	4	3	3	2	4	3	3	2	3	2	3	1	1	2	3	1	3	1	4	2.1	2	3	3	3	5	3	3	2	1	1	2.6	4	3	3	4	4	2	5	1	2	1	5
727	1	10	9	3	2	2	3	2	3	4	3	3	3	2	2	2.77778	2	1	2	3	3	2	1	3	3	2	2.2	4	5	5	4	3	4	5	5	5	4	4.4	3	1	1	1	2	3	2	2	2	2	4
728	0	10	10	5	4	5	4	3	4	3	4	5	4	4	4	3.88889	2	2	1	2	3	1	3	3	1	4	2.2	5	5	5	5	5	5	5	4	5	4	4.8	3	3	3	4	3	2	4	3	2	4	4
729	1	12	10	4	4	4	5	4	4	3	4	4	3	4	2	3.66667	5	5	5	5	4	5	5	5	4	5	4.8	5	4	4	5	5	5	5	4	4	4	4.5	3	1	3	3	2	1	4	4	3	3	3
730	1	10	7	5	5	5	4	1	2	4	4	4	4	2	2	3	3	3	1	1	3	3	5	3	3	3	2.8	4	5	4	5	5	5	5	5	4	5	4.7	3	3	3	3	3	2	3	3	3	4	6
731	0	13	8	5	4	4	5	5	5	5	5	5	5	5	5	5	2	3	1	3	3	3	3	4	3	4	2.9	1	3	3	4	3	1	3	3	3	3	2.7	1	1	2	2	2	1	2	1	3	3	3
732	1	13	6	1	2	2	5	5	5	4	5	5	5	5	5	4.88889	4	4	2	3	3	4	4	3	4	3	3.4	3	2	3	3	3	1	1	3	1	2	2.2	3	3	4	4	5	2	4	3	4	4	4
733	1	11	10	4	4	3	4	5	5	4	4	5	5	5	3	4.44444	1	2	2	1	3	1	1	3	1	3	1.8	3	3	3	4	3	4	3	3	3	3	3.2	2	3	2	3	1	3	4	1	1	1	2
734	0	11	10	5	5	5	5	5	5	5	4	5	4	5	4	4.66667	3	1	1	1	3	3	4	4	3	3	2.6	3	1	3	3	2	2	2	3	2	2	2.3	1	3	1	4	2	2	2	1	1	4	3
735	0	14	6	2	1	2	4	5	3	3	3	5	3	4	4	3.77778	5	5	5	5	4	5	4	5	5	5	4.8	3	3	3	4	5	4	4	4	4	4	3.8	6	4	4	3	6	6	5	4	5	5	5
736	0	13	5	5	3	5	5	5	5	3	5	5	5	5	5	4.77778	4	5	5	4	3	4	4	4	3	4	4	4	5	4	5	4	4	5	5	4	4	4.4	3	3	5	6	2	4	5	4	4	5	5
737	0	11	9	3	1	3	4	3	3	1	3	4	4	3	3	3.11111	4	5	5	4	4	4	4	4	4	4	4.2	3	2	1	4	3	4	3	3	3	2	2.8	1	3	2	1	2	1	2	1	1	2	1
738	1	11	8	1	4	5	5	5	5	4	5	5	4	5	5	4.77778	2	2	3	3	3	2	3	2	4	3	2.7	3	3	3	3	3	3	3	3	3	3	3	3	2	1	1	2	3	2	1	2	2	3
739	1	10	2	4	4	2	2	3	2	2	3	3	1	2	2	2.22222	5	5	5	3	4	5	5	5	4	5	4.6	2	3	3	4	1	3	3	3	3	3	2.8	4	5	4	4	5	6	5	5	4	4	5
740	0	12	1	3	1	1	4	4	3	3	5	5	5	5	5	4.33333	2	1	3	2	3	2	1	3	3	3	2.3	4	3	3	3	4	4	4	3	3	3	3.4	1	3	2	2	1	3	1	2	2	2	3
741	1	12	5	4	2	3	4	4	3	4	5	4	3	4	4	3.88889	4	4	4	4	4	4	4	3	3	5	3.9	5	4	3	4	5	3	5	4	4	3	4	3	3	4	4	3	3	3	2	3	3	2
742	0	14	10	4	1	1	4	5	5	5	5	4	4	5	5	4.66667	5	4	4	3	5	4	3	4	4	5	4.1	3	3	3	3	3	4	3	3	3	3	3.1	3	2	1	3	3	1	3	1	2	3	1
743	1	14	5	2	5	1	3	4	3	4	3	4	3	2	3	3.22222	2	2	1	1	3	1	1	2	2	3	1.8	4	3	5	4	4	5	4	3	5	3	4	3	2	2	3	3	3	4	3	2	2	3
744	1	14	7	5	5	4	5	5	4	4	5	4	4	5	4	4.44444	2	2	1	1	2	2	1	1	2	2	1.6	3	3	3	3	3	1	4	3	2	2	2.7	4	2	1	1	3	4	3	3	3	1	1
745	0	14	10	4	5	2	5	4	3	5	5	5	4	4	5	4.44444	4	5	4	5	4	4	4	4	4	5	4.3	4	4	3	5	3	4	4	5	5	5	4.2	2	4	3	3	3	3	4	4	2	3	2
746	0	13	9	3	4	4	3	3	2	2	1	1	2	2	1	1.88889	4	5	5	5	5	5	5	5	5	5	4.9	5	5	5	5	5	5	5	5	5	5	5	5	6	4	5	5	4	6	4	4	5	3
747	0	13	3	1	2	3	4	4	3	4	3	4	5	4	5	4	5	5	5	3	5	4	4	4	4	4	4.3	4	5	5	4	4	5	5	5	4	5	4.6	4	5	6	5	3	6	4	4	5	4	6
748	1	13	6	3	1	2	1	2	2	1	1	3	2	2	1	1.66667	5	5	5	5	5	5	4	5	5	5	4.9	5	5	5	5	5	5	5	5	5	4	4.9	3	3	4	3	4	3	4	2	4	4	3
749	1	10	6	2	1	2	5	4	5	5	4	5	4	5	4	4.55556	2	2	1	1	1	4	3	2	1	3	2	3	3	3	5	3	4	4	3	1	3	3.2	4	2	4	2	3	2	5	3	2	3	2
750	0	12	3	4	2	4	5	5	5	4	5	5	4	4	4	4.55556	3	1	2	2	2	3	3	2	3	3	2.4	3	4	3	3	4	4	5	4	4	4	3.8	4	6	3	4	5	3	4	3	2	2	3
751	0	13	9	5	5	5	4	4	4	4	3	3	3	3	4	3.55556	5	4	5	3	4	5	4	4	5	5	4.4	4	5	5	5	4	4	4	5	5	3	4.4	5	6	4	5	4	6	5	6	3	4	3
752	0	14	7	3	5	5	4	2	1	3	3	5	3	4	2	3	5	4	5	5	4	4	4	5	4	5	4.5	3	3	4	3	3	2	4	4	4	4	3.4	4	1	4	5	2	4	3	3	3	1	3
753	1	13	5	5	5	4	3	1	3	2	3	2	2	3	3	2.44444	3	4	5	5	4	4	5	4	5	4	4.3	5	5	4	5	5	5	5	5	5	5	4.9	3	4	4	4	6	4	6	4	2	5	5
754	0	12	9	4	5	4	4	5	4	1	3	4	4	4	4	3.66667	3	4	4	3	4	4	5	4	4	4	3.9	4	3	3	3	3	3	2	3	3	3	3	2	1	2	2	1	2	3	2	1	2	1
755	1	11	7	3	2	1	5	5	5	5	5	4	5	5	5	4.88889	4	4	4	3	3	3	2	4	3	5	3.5	3	4	3	3	3	4	3	1	4	5	3.3	4	4	5	3	4	4	3	5	4	3	3
756	0	14	6	2	3	2	5	5	5	5	4	5	4	5	5	4.77778	2	2	3	3	3	1	2	2	3	3	2.4	3	2	2	3	2	3	3	3	3	3	2.7	3	2	4	1	3	4	4	4	3	3	3
757	1	10	9	4	5	5	4	5	3	5	4	4	4	5	5	4.33333	5	5	5	3	5	4	4	4	4	4	4.3	3	4	4	3	4	4	5	3	3	4	3.7	1	2	3	3	1	1	2	2	3	2	5
758	0	14	10	1	4	4	2	1	2	4	3	3	3	3	2	2.55556	4	5	2	4	4	4	3	4	4	4	3.8	4	4	5	5	5	5	4	5	4	4	4.5	3	3	5	4	4	5	4	4	3	6	4
759	1	10	7	1	1	3	5	5	5	5	5	4	5	5	5	4.88889	1	2	2	1	2	1	1	1	3	2	1.6	4	3	3	4	4	4	4	5	4	4	3.9	5	6	6	5	4	4	4	6	6	5	4
760	0	10	3	4	1	1	5	4	4	5	5	5	4	4	4	4.44444	4	3	4	3	3	3	4	3	3	4	3.4	1	2	3	3	3	3	2	2	3	2	2.4	1	1	4	2	3	1	2	1	2	3	2
761	0	14	9	2	4	4	5	5	4	4	5	5	5	5	4	4.66667	4	2	4	1	2	4	3	4	4	4	3.2	4	4	4	4	4	5	5	4	3	4	4.1	4	5	4	5	5	4	4	4	4	6	4
762	0	10	6	1	1	1	2	1	3	1	3	1	2	2	2	1.88889	5	5	5	5	5	5	5	5	4	5	4.9	5	5	5	5	5	5	4	5	5	5	4.9	3	1	4	4	2	2	1	3	3	4	4
763	1	14	8	5	2	3	2	4	4	3	4	2	3	4	4	3.33333	5	5	5	4	5	5	4	5	5	5	4.8	4	5	4	4	4	5	5	4	4	4	4.3	6	3	5	4	5	5	6	5	4	4	5
764	0	11	6	5	3	1	5	4	4	5	4	5	5	5	5	4.66667	2	1	3	1	3	3	2	3	3	3	2.4	1	3	1	3	1	3	2	1	2	2	1.9	1	2	2	3	2	3	2	3	1	3	3
765	0	13	9	4	5	5	3	4	4	3	4	3	4	2	4	3.44444	3	3	4	3	1	3	4	3	4	3	3.1	4	4	4	5	5	5	5	4	4	4	4.4	4	4	5	5	6	3	5	4	3	5	3
766	0	12	4	4	1	3	5	4	4	5	4	5	5	5	5	4.66667	3	3	4	4	1	3	3	3	3	4	3.1	1	3	3	3	1	1	1	3	1	1	1.8	2	1	2	1	3	2	1	2	1	4	1
767	1	12	10	1	5	4	4	4	4	3	4	5	3	3	4	3.77778	5	4	5	3	4	4	4	4	3	4	4	4	5	5	5	4	5	4	4	4	3	4.3	1	2	2	3	3	1	2	1	1	4	2
768	1	10	8	2	3	4	2	1	4	3	2	4	3	3	2	2.66667	4	5	4	4	4	5	4	5	4	5	4.4	4	4	3	3	5	1	3	4	2	1	3	2	1	1	2	2	3	1	1	2	3	2
769	1	12	9	1	2	3	3	3	4	3	3	4	4	4	4	3.55556	4	2	5	3	3	4	3	4	3	3	3.4	4	4	4	5	3	5	5	3	5	4	4.2	3	3	4	3	3	2	1	3	3	4	3
770	1	10	6	2	1	3	4	5	5	5	3	4	5	4	4	4.33333	2	4	4	3	3	4	4	4	4	3	3.5	2	3	3	3	1	1	2	1	3	2	2.1	3	2	3	3	1	3	3	3	3	4	3
771	0	10	4	4	4	3	5	4	3	3	4	3	3	4	4	3.66667	5	4	4	3	3	4	4	4	3	4	3.8	4	3	4	5	4	5	5	4	3	5	4.2	5	4	6	6	5	3	6	5	4	5	4
772	1	13	7	4	1	2	3	2	2	3	2	2	3	3	3	2.55556	4	4	4	3	4	4	5	3	4	4	3.9	4	5	5	5	5	5	5	4	5	4	4.7	3	2	3	2	2	3	1	2	3	3	1
773	0	10	2	4	5	3	3	1	3	1	3	1	3	2	3	2.22222	5	5	5	5	5	5	5	5	5	5	5	4	3	5	3	4	5	3	5	5	4	4.1	5	5	3	2	5	4	5	4	4	5	3
774	1	10	10	5	5	5	4	3	5	3	3	4	5	4	4	3.88889	5	5	5	5	4	5	4	5	4	5	4.7	3	3	3	4	3	5	4	3	4	2	3.4	4	5	6	3	5	4	5	4	4	4	6
775	1	14	10	5	4	4	1	3	4	1	3	3	4	3	3	2.77778	5	5	5	5	5	5	5	5	5	5	5	5	5	4	5	5	5	5	5	5	4	4.8	6	6	5	5	4	4	5	5	4	6	6
776	0	14	1	4	1	5	4	4	3	3	5	4	3	4	4	3.77778	1	1	1	3	3	2	1	3	1	3	1.9	3	2	3	3	3	1	4	3	1	2	2.5	3	3	4	2	4	2	2	3	1	3	4
777	0	14	9	4	3	3	1	3	3	2	3	3	3	2	3	2.55556	3	4	4	3	4	4	4	3	4	4	3.7	4	3	4	4	4	3	4	5	3	3	3.7	4	4	5	6	6	4	4	5	5	4	5
778	0	11	6	5	4	5	3	2	2	5	4	4	3	2	2	3	3	2	2	1	3	4	3	3	1	2	2.4	3	4	3	3	4	3	4	3	3	3	3.3	2	2	1	3	4	2	1	2	3	3	4
779	0	14	1	2	2	3	4	4	5	4	4	4	5	4	5	4.33333	5	5	5	4	4	5	4	5	4	4	4.5	4	5	3	5	5	5	4	4	5	5	4.5	4	5	6	6	6	5	4	6	4	5	5
780	1	14	8	4	3	4	3	3	4	3	2	3	3	2	4	3	2	2	1	1	2	2	3	3	3	3	2.2	4	5	5	5	5	5	5	5	5	4	4.8	3	3	3	3	2	3	3	2	3	4	4
781	0	10	8	3	4	5	1	4	3	2	4	2	2	2	2	2.44444	4	4	2	3	3	3	4	3	3	4	3.3	3	4	5	4	4	4	5	4	5	3	4.1	5	4	6	4	6	6	6	5	6	5	5
782	0	14	9	5	5	2	4	4	5	5	4	3	5	4	4	4.22222	3	4	3	3	3	3	4	5	4	3	3.5	5	4	4	4	5	5	4	4	3	4	4.2	3	2	4	5	3	4	4	4	3	3	4
783	1	13	7	2	4	3	4	3	3	4	4	5	3	4	4	3.77778	3	2	1	3	3	4	3	4	1	3	2.7	4	5	5	4	5	5	5	4	5	4	4.6	4	4	3	3	5	4	5	4	4	4	5
784	0	13	4	3	1	2	1	4	3	3	2	1	3	2	2	2.33333	5	5	5	4	4	4	5	5	5	5	4.7	3	3	3	4	4	1	4	4	4	3	3.3	4	3	4	4	3	2	2	3	3	4	4
785	0	10	1	2	3	1	5	5	4	3	4	4	4	3	5	4.11111	4	4	5	3	5	4	5	4	4	5	4.3	3	1	4	3	1	2	3	4	3	3	2.7	1	3	4	2	2	1	1	3	3	2	3
786	1	13	9	3	1	3	4	4	5	2	4	3	4	3	5	3.77778	4	5	4	4	4	5	5	5	4	4	4.4	4	4	4	3	4	5	4	5	4	4	4.1	5	3	4	4	4	3	4	5	4	6	6
787	0	12	10	3	5	4	4	2	1	5	4	4	3	3	4	3.33333	5	4	4	4	4	4	5	5	4	4	4.3	2	3	3	4	3	3	3	3	3	3	3	3	2	2	3	4	4	3	2	3	3	3
788	0	10	5	5	2	4	3	3	4	3	4	3	4	4	2	3.33333	4	3	4	3	3	4	3	3	4	4	3.5	4	4	4	4	4	5	4	4	4	4	4.1	3	2	3	3	5	4	2	3	4	4	3
789	0	11	9	5	3	4	2	1	3	3	2	3	3	3	2	2.44444	5	5	5	5	3	5	5	5	5	4	4.7	5	5	4	5	5	5	5	5	5	5	4.9	4	4	5	5	3	4	3	4	3	6	5
790	0	12	10	4	5	5	3	5	5	4	5	5	5	2	5	4.33333	5	3	5	4	3	4	4	4	3	4	3.9	5	5	5	4	4	5	4	4	5	3	4.4	1	1	3	3	2	2	2	1	2	3	2
791	1	14	10	5	5	5	3	1	2	1	3	3	3	3	2	2.33333	5	5	5	4	5	5	5	5	4	5	4.8	5	4	5	5	5	5	5	5	5	4	4.8	3	2	3	2	3	1	3	4	4	3	4
792	1	14	1	1	1	1	4	5	4	3	3	5	3	4	4	3.88889	5	5	4	5	5	5	5	5	4	5	4.8	3	3	1	2	4	2	3	4	2	2	2.6	4	4	4	6	5	1	5	4	2	3	3
793	1	12	5	4	2	4	5	5	5	5	5	4	5	5	5	4.88889	3	4	4	3	3	4	4	5	4	3	3.7	3	3	3	4	3	4	3	3	3	4	3.3	2	3	2	2	2	3	2	2	2	2	4
794	1	13	8	1	4	3	2	2	1	3	2	4	1	3	1	2.11111	5	5	5	5	5	5	5	5	5	4	4.9	5	5	5	5	5	5	4	5	5	4	4.8	3	2	3	2	3	3	2	2	1	3	3
795	0	13	2	3	2	2	1	3	4	2	3	1	3	3	3	2.55556	5	5	4	5	4	5	5	5	5	4	4.7	4	5	5	5	5	5	4	5	4	5	4.7	5	5	4	5	6	4	5	5	6	6	4
796	1	10	1	3	5	2	3	1	2	1	4	3	2	1	2	2.11111	4	4	3	4	3	3	3	4	4	4	3.6	3	3	3	3	4	4	4	3	2	3	3.2	3	3	5	1	2	4	2	4	3	3	4
797	1	11	9	5	5	4	4	5	4	5	4	5	4	3	4	4.22222	2	2	1	1	1	3	1	1	1	1	1.4	3	4	4	4	4	4	4	4	5	4	4	3	3	4	3	3	3	2	3	3	1	1
798	1	11	7	2	4	1	5	5	5	4	4	4	4	5	3	4.33333	4	5	4	5	5	5	3	4	4	3	4.2	3	5	5	5	4	5	4	5	4	5	4.5	4	3	4	3	4	4	3	4	4	3	5
799	0	12	10	5	4	5	4	3	4	5	5	4	5	5	5	4.44444	5	4	4	4	3	4	4	4	4	4	4	3	4	4	4	3	5	4	4	3	3	3.7	3	3	5	2	3	3	3	2	2	3	3
800	0	12	4	3	2	2	5	5	4	4	4	5	5	5	5	4.66667	3	2	4	3	4	4	1	3	3	1	2.8	4	3	3	4	2	3	4	3	3	3	3.2	4	3	4	2	4	4	3	3	4	4	2
801	0	11	7	5	4	4	3	5	3	5	2	3	3	2	2	3.11111	5	5	5	4	4	4	4	5	5	4	4.5	5	4	5	5	5	5	4	5	5	5	4.8	4	3	4	4	5	5	5	3	4	5	5
802	0	12	8	5	5	4	5	5	5	5	4	5	4	5	5	4.77778	4	4	3	3	5	3	3	4	3	4	3.6	3	4	3	4	3	4	4	5	4	4	3.8	3	2	3	4	3	3	3	3	2	4	3
803	1	13	1	1	5	1	2	4	4	4	3	2	4	3	3	3.22222	4	4	4	5	4	5	5	4	4	4	4.3	3	4	3	5	4	5	5	5	4	4	4.2	6	4	5	6	5	6	3	4	4	6	4
804	1	14	10	2	3	4	4	5	4	3	5	4	4	3	4	4	4	4	4	4	4	3	4	5	5	4	4.1	5	4	5	5	5	5	4	4	4	4	4.5	3	2	3	3	1	3	4	1	3	1	2
805	1	11	4	2	3	3	5	4	5	5	5	5	5	5	5	4.88889	2	3	2	3	4	2	3	3	3	4	2.9	1	3	2	3	3	1	3	1	1	1	1.9	1	1	2	4	2	1	2	1	2	2	1
806	1	11	5	1	1	1	4	3	3	2	3	1	4	4	3	3	3	3	3	2	3	3	3	4	3	2	2.9	4	4	3	3	3	2	3	4	3	3	3.2	3	1	5	4	4	4	2	3	1	4	5
807	1	11	10	5	5	5	3	3	3	2	5	5	4	5	3	3.66667	4	3	4	4	3	4	4	3	4	3	3.6	3	3	3	3	3	4	3	4	3	4	3.3	3	3	3	3	1	4	1	2	2	4	3
[truncated: 62 more columns]
